# Supplementary material
Source: PubMed Central journal article supplement (PMC5027975)
Supplement: NIHMS790059-supplement-supplement_1.pdf [file NIHMS790059-supplement-supplement_1.pdf]

**Supplementary Table 1.** Heat map of all 314 metabolites profiled in this study. Red and blue shaded cells indicate  $p \leq 0.05$  (red indicates that the mean values are significantly higher for that comparison; blue values significantly lower). Light red and light blue shaded cells indicate  $0.05 < p < 0.10$  (light red indicates that the mean values trend higher for that comparison; light green values trend lower).

**Supplementary Table 2.** Box plots of all 314 metabolites profiled in this study. The top and bottom bars with whiskers represent the entire spread of the data points for the samples, excluding extreme points, which are indicated with small circles. Within the boxplot, the plus (+) indicates the mean value, and the horizontal dividing line is the median value. The top and bottom of the box represent the seventy-fifth and twenty-fifth percentile, with the whiskers indicating the maximum and minimum points. The *p-values* for all comparisons are referenced in Supplementary Table 1.

| Biochemical Name                   | PUBCHEM   | Fold of Change   |                    |                   |                   | ANOVA Comparisons |          |                    |          |                   |         |                   |          |
|------------------------------------|-----------|------------------|--------------------|-------------------|-------------------|-------------------|----------|--------------------|----------|-------------------|---------|-------------------|----------|
|                                    |           | WT p22<br>WT p15 | TWI p22<br>TWI p15 | TWI p15<br>WT p15 | TWI p22<br>WT p22 | WT p22<br>WT p15  |          | TWI p22<br>TWI p15 |          | TWI p15<br>WT p15 |         | TWI p22<br>WT p22 |          |
|                                    |           | p-value          | q-value            | p-value           | q-value           | p-value           | q-value  | p-value            | q-value  | p-value           | q-value | p-value           | q-value  |
| glycine                            | 750       | 1.08             | 1.16               | 0.96              | 1.03              | 0.1437            | 0.053    | 0.0109             | 0.0127   | 0.5496            | 0.975   | 0.5418            | 0.8072   |
| sarcosine (N-Methylglycine)        | 1088      | 1.05             | 1                  | 1.05              | 0.99              | 0.5571            | 0.138    | 0.8411             | 0.4022   | 0.5402            | 0.9698  | 0.8611            | 0.8756   |
| dimethylglycine                    | 673       | 0.42             | 0.56               | 0.88              | 1.16              | 1.86E-05          | 2.63E-05 | 0.0025             | 0.0041   | 0.3394            | 0.9698  | 0.3987            | 0.7435   |
| betaine                            | 247       | 1.05             | 0.75               | 1.02              | 0.72              | 0.4659            | 0.1223   | 0.0001             | 0.0003   | 0.8038            | 0.9997  | 2.65E-05          | 0.0016   |
| serine                             | 5951      | 0.55             | 0.65               | 1.02              | 1.2               | 1.81E-11          | 4.09E-10 | 1.96E-08           | 1.95E-07 | 0.7149            | 0.9841  | 0.002             | 0.0302   |
| 3-phosphoserine                    | 68841     | 1.41             | 1.91               | 0.71              | 0.96              | 0.0734            | 0.0315   | 0.0043             | 0.0061   | 0.1841            | 0.9698  | 0.9063            | 0.8846   |
| threonine                          | 6288      | 0.41             | 0.56               | 1.09              | 1.5               | 4.20E-12          | 1.42E-10 | 3.63E-08           | 2.97E-07 | 0.279             | 0.9698  | 2.18E-05          | 0.0016   |
| N-acetylthreonine                  | 152204    | 0.73             | 0.72               | 1.05              | 1.03              | 6.28E-05          | 7.10E-05 | 4.37E-05           | 0.0001   | 0.5295            | 0.9698  | 0.6184            | 0.8213   |
| allo-threonine                     | 99289     | 0.27             | 0.68               | 0.97              | 2.4               | 1.23E-05          | 1.86E-05 | 0.1186             | 0.0932   | 0.6545            | 0.9841  | 0.0031            | 0.0366   |
| homoserine                         | 12647     | 0.85             | 0.63               | 1                 | 0.74              | 0.2798            | 0.0856   | 0.0002             | 0.0005   | 0.7479            | 0.9866  | 0.0077            | 0.0674   |
| alanine                            | 5950      | 0.96             | 0.99               | 0.97              | 1                 | 0.3829            | 0.1061   | 0.8618             | 0.4039   | 0.4542            | 0.9698  | 0.9618            | 0.8846   |
| N-acetylaniline                    | 88064     | 1.15             | 1.35               | 0.9               | 1.06              | 0.2774            | 0.0855   | 0.0038             | 0.0056   | 0.2465            | 0.9698  | 0.3921            | 0.736    |
| aspartate                          | 5960      | 1.7              | 1.54               | 1.07              | 0.97              | 1.63E-08          | 6.40E-08 | 8.89E-07           | 5.16E-06 | 0.2489            | 0.9698  | 0.7139            | 0.8465   |
| N-acetylaspartate (NAA)            | 65065     | 1.33             | 1.21               | 1                 | 0.91              | 1.19E-08          | 5.39E-08 | 1.22E-05           | 4.72E-05 | 0.9539            | 0.9997  | 0.0116            | 0.0674   |
| glutamate                          | 611       | 1.27             | 1.19               | 1.02              | 0.95              | 1.13E-05          | 1.83E-05 | 0.0007             | 0.0013   | 0.6352            | 0.9841  | 0.3152            | 0.6879   |
| glutamine                          | 5961      | 0.97             | 0.98               | 1                 | 1                 | 0.3433            | 0.0987   | 0.4069             | 0.255    | 0.97              | 0.9997  | 0.8741            | 0.8759   |
| N-acetylglutamate                  | 70914     | 1.21             | 1.32               | 0.89              | 0.96              | 0.0065            | 0.0046   | 0.0002             | 0.0005   | 0.0672            | 0.9698  | 0.5599            | 0.8195   |
| N-acetylglutamine                  | 182230    | 1.38             | 1.36               | 0.97              | 0.95              | 1.02E-06          | 2.56E-06 | 1.82E-06           | 9.09E-06 | 0.5091            | 0.9698  | 0.3833            | 0.7342   |
| N-acetyl-aspartyl-glutamate (NAAG) | 5255      | 0.86             | 0.88               | 1.02              | 1.05              | 0.0005            | 0.0004   | 0.0025             | 0.0041   | 0.5049            | 0.9698  | 0.1983            | 0.5815   |
| gamma-aminobutyrate (GABA)         | 119       | 1.33             | 1.31               | 0.98              | 0.96              | 1.97E-05          | 2.73E-05 | 3.20E-05           | 0.0001   | 0.6311            | 0.9841  | 0.5131            | 0.7996   |
| glutamate, gamma-methyl ester      | 68662     | 0.95             | 0.8                | 0.94              | 0.79              | 0.6335            | 0.1514   | 0.067              | 0.0597   | 0.4148            | 0.9698  | 0.0324            | 0.1876   |
| pyroglutamine*                     | 134508    | 2.26             | 1.67               | 1.01              | 0.75              | 2.98E-06          | 6.12E-06 | 0.0006             | 0.0012   | 0.9955            | 0.9997  | 0.0576            | 0.2896   |
| histidine                          | 6274      | 0.84             | 0.96               | 0.97              | 1.11              | 0.0197            | 0.0109   | 0.593              | 0.3236   | 0.6943            | 0.9841  | 1.1359            | 0.4954   |
| 1-methylimidazoleacetate           | 75810     | 1.35             | 1.28               | 1.02              | 0.96              | 0.0726            | 0.0315   | 0.0503             | 0.046    | 0.9493            | 0.9997  | 0.9084            | 0.8846   |
| lysine                             | 5962      | 0.85             | 0.88               | 0.98              | 1.01              | 0.0062            | 0.0045   | 0.0182             | 0.0193   | 0.7814            | 0.9997  | 0.8665            | 0.8759   |
| N6-acetyllysine                    | 92832     | 1.14             | 1.02               | 1.04              | 0.93              | 0.1618            | 0.0575   | 0.6755             | 0.3561   | 0.7375            | 0.9841  | 0.5049            | 0.7996   |
| 2-aminoadipate                     | 469       | 3.18             | 3.35               | 0.92              | 0.97              | 3.75E-09          | 2.12E-08 | 2.70E-09           | 4.18E-08 | 0.4946            | 0.9698  | 0.5828            | 0.8195   |
| pipecolate                         | 849       | 0.7              | 0.69               | 0.9               | 0.89              | 0.0169            | 0.0097   | 0.0037             | 0.0055   | 0.6765            | 0.9841  | 0.3019            | 0.6792   |
| 5-aminovalerate                    | 138       | 0.75             | 0.71               | 1.07              | 1.01              | 0.0004            | 0.0004   | 5.62E-05           | 0.0002   | 0.3014            | 0.9698  | 0.7619            | 0.8511   |
| phenylalanine                      | 6140      | 0.92             | 1.05               | 1.07              | 1.22              | 0.0789            | 0.0333   | 0.2454             | 0.1666   | 0.1335            | 0.9698  | 9.34E-05          | 0.0044   |
| tyrosine                           | 6057      | 0.86             | 0.85               | 1.06              | 1.05              | 0.0763            | 0.0324   | 0.0588             | 0.0532   | 0.4176            | 0.9698  | 0.4934            | 0.7985   |
| 3-(4-hydroxyphenyl)lactate         | 9378      | 1.03             | 0.82               | 1                 | 0.79              | 0.5733            | 0.1405   | 0.0963             | 0.0803   | 0.7937            | 0.9997  | 0.0523            | 0.2762   |
| tryptophan                         | 6305      | 0.81             | 0.96               | 1.05              | 1.25              | 0.0048            | 0.0036   | 0.5661             | 0.3164   | 0.4284            | 0.9698  | 0.0027            | 0.0346   |
| 3-indoxyl sulfate                  | 10258     | 3.85             | 2.44               | 1.1               | 0.7               | 1.34E-08          | 5.68E-08 | 2.51E-05           | 8.75E-05 | 0.7602            | 0.9946  | 0.0165            | 0.1253   |
| 5-hydroxyindoleacetate             | 1826      | 0.72             | 1                  | 0.96              | 1.33              | 0.0344            | 0.0167   | 0.8237             | 0.4018   | 0.8471            | 0.9997  | 0.0322            | 0.1876   |
| C-glycosyltryptophan*              |           | 0.89             | 0.9                | 0.94              | 0.94              | 0.0259            | 0.0134   | 0.0387             | 0.0372   | 0.2076            | 0.9698  | 0.278             | 0.6579   |
| leucine                            | 6106      | 0.9              | 1.02               | 1.06              | 1.19              | 0.0223            | 0.0121   | 0.6873             | 0.3591   | 0.2187            | 0.9698  | 0.0003            | 0.0105   |
| isovalerylcarnitine                | 6426851   | 1.24             | 1.41               | 1.01              | 1.15              | 0.2003            | 0.0667   | 0.0214             | 0.0221   | 0.6395            | 0.9841  | 0.52              | 0.7996   |
| beta-hydroxyisovalerylcarnitine    |           | 1.43             | 1.77               | 0.95              | 1.18              | 3.00E-05          | 3.57E-05 | 1.19E-08           | 1.50E-07 | 0.4949            | 0.9698  | 0.0303            | 0.1857   |
| isoleucine                         | 6306      | 0.8              | 0.88               | 1.08              | 1.18              | 2.71E-05          | 3.54E-05 | 0.0072             | 0.0093   | 0.0913            | 0.9698  | 0.0006            | 0.0158   |
| 2-methylbutyrylcarnitine (C5)      | 6426901   | 0.9              | 1.05               | 1.15              | 1.35              | 0.4665            | 0.1223   | 0.7183             | 0.3664   | 0.295             | 0.9698  | 0.0387            | 0.2177   |
| valine                             | 6287      | 0.71             | 0.81               | 1.1               | 1.26              | 6.71E-07          | 1.88E-06 | 0.0006             | 0.0012   | 0.0924            | 0.9698  | 0.0002            | 0.0086   |
| isobutyrylcarnitine                | 168379    | 0.78             | 1.25               | 1.08              | 1.73              | 0.2617            | 0.0815   | 0.0963             | 0.0803   | 0.8023            | 0.9997  | 0.0042            | 0.0452   |
| methionine                         | 6137      | 0.98             | 0.98               | 1.04              | 1.03              | 0.7169            | 0.1684   | 0.7049             | 0.3633   | 0.4946            | 0.9698  | 0.5047            | 0.7996   |
| N-acetylmethionine                 | 448580    | 1.11             | 1.26               | 1.07              | 1.21              | 0.106             | 0.0423   | 0.0006             | 0.0012   | 0.2973            | 0.9698  | 0.0028            | 0.0346   |
| S-adenosylhomocysteine (SAH)       | 439155    | 1.14             | 0.97               | 1.12              | 0.95              | 0.0156            | 0.0093   | 0.5676             | 0.3164   | 0.0357            | 0.9698  | 0.3522            | 0.7243   |
| cystathionine                      | 439258    | 0.76             | 0.81               | 0.95              | 1.02              | 0.5712            | 0.1405   | 0.3511             | 0.2272   | 0.7272            | 0.9841  | 0.9819            | 0.8889   |
| 2-aminobutyrate                    | 439691    | 0.16             | 0.18               | 1.08              | 1.23              | 1.20E-14          | 8.12E-13 | 5.80E-14           | 8.06E-12 | 0.506             | 0.9698  | 0.1254            | 0.4706   |
| 2-hydroxybutyrate (AHB)            | 440864    | 0.49             | 0.47               | 1.07              | 1.03              | 1.66E-06          | 3.88E-06 | 3.39E-07           | 2.24E-06 | 0.415             | 0.9698  | 0.8188            | 0.8662   |
| cysteine                           | 5862      | 1.29             | 1.17               | 1.1               | 1                 | 0.0074            | 0.0051   | 0.1206             | 0.0937   | 0.2432            | 0.9698  | 0.9242            | 0.8846   |
| hypotaurine                        | 107812    | 0.85             | 0.94               | 1.14              | 1.27              | 0.1886            | 0.0631   | 0.8093             | 0.3994   | 0.5061            | 0.9698  | 0.0863            | 0.3739   |
| taurine                            | 1123      | 0.68             | 0.67               | 1.01              | 1                 | 1.70E-08          | 6.40E-08 | 1.50E-08           | 1.74E-07 | 0.9205            | 0.9997  | 0.9595            | 0.8846   |
| arginine                           | 232       | 1.09             | 1.05               | 1.04              | 1.01              | 0.036             | 0.0172   | 0.1917             | 0.1375   | 0.2444            | 0.9698  | 0.7487            | 0.8511   |
| urea                               | 1176      | 0.67             | 1.03               | 0.86              | 1.32              | 0.0062            | 0.0045   | 0.9986             | 0.4432   | 0.3887            | 0.9698  | 0.0462            | 0.2503   |
| ornithine                          | 6262      | 0.85             | 0.87               | 0.88              | 0.9               | 0.7215            | 0.1684   | 0.7831             | 0.3906   | 0.5373            | 0.9698  | 0.5918            | 0.8195   |
| proline                            | 145742    | 0.71             | 0.79               | 0.97              | 1.09              | 6.92E-07          | 1.88E-06 | 0.0002             | 0.0005   | 0.6918            | 0.9841  | 0.1031            | 0.4068   |
| citrulline                         | 9750      | 0.93             | 0.75               | 1.04              | 0.83              | 0.1546            | 0.0561   | 1.79E-06           | 9.09E-06 | 0.4028            | 0.9698  | 0.0009            | 0.0186   |
| argininosuccinate                  | 16950;828 | 1.16             | 1.17               | 1.03              | 1.04              | 0.0147            | 0.009    | 0.0058             | 0.0077   | 0.5618            | 0.9839  | 0.3381            | 0.7105   |
| homocitrulline                     | 65072     | 1.3              | 1.45               | 0.82              | 0.92              | 0.0194            | 0.0108   | 0.0031             | 0.0048   | 0.1776            | 0.9698  | 0.5353            | 0.806    |
| dimethylarginine (SDMA + ADMA)     | 123831    | 0.69             | 1.19               | 0.74              | 1.28              | 0.0199            | 0.0109   | 0.2299             | 0.1608   | 0.0535            | 0.9698  | 0.104             | 0.4068   |
| N-delta-acetylornithine*           | 9920500   | 4.44             | 2.89               | 1.19              | 0.77              | 1.48E-09          | 1.14E-08 | 4.37E-06           | 1.96E-05 | 0.1335            | 0.9698  | 0.1248            | 0.4706   |
| trans-4-hydroxyproline             | 5810      | 0.38             | 0.36               | 1.02              | 0.95              | 6.48E-11          | 1.10E-09 | 1.03E-11           | 7.17E-10 | 0.8277            | 0.9997  | 0.5254            | 0.7996   |
| pro-hydroxy-pro                    | 11673055  | 0.29             | 0.41               | 1.04              | 1.44              | 8.25E-09          | 4.00E-08 | 1.68E-06           | 9.09E-06 | 0.8512            | 0.9997  | 0.0327            | 0.1876   |
| creatine                           | 586       | 1.02             | 1.03               | 1                 | 1.02              | 0.677             | 0.1607   | 0.3435             | 0.2234   | 0.9886            | 0.9997  | 0.582             | 0.8195   |
| creatinine                         | 588       | 1.09             | 1.01               | 0.99              | 0.92              | 0.1357            | 0.0514   | 0.9501             | 0.4293   | 0.9478            | 0.9997  | 0.135             | 0.4954   |
| putrescine                         | 1045      | 0.34             | 1.28               | 0.93              | 3.48              | 5.12E-08          | 1.74E-07 | 0.1021             | 0.0831   | 0.9592            | 0.9997  | 9.31E-10          | 2.62E-07 |
| spermine                           | 1103      | 0.35             | 0.38               | 0.9               | 0.97              | 4.94E-06          | 9.07E-06 | 2.72E-05           | 9.22E-05 | 0.5715            | 0.9839  | 0.9589            | 0.8846   |
| spermidine                         | 1102      | 0.65             | 0.68               | 0.97              | 1.01              | 2.26E-06          | 4.79E-06 | 1.40E-05           | 5.26E-05 | 0.696             | 0.9841  | 0.7845            | 0.8532   |

|                                                                         |          |      |      |      |      |          |          |          |          |        |        |        |        |
|-------------------------------------------------------------------------|----------|------|------|------|------|----------|----------|----------|----------|--------|--------|--------|--------|
| 5-methylthioadenosine (MTA)                                             | 439176   | 0.69 | 0.71 | 1.02 | 1.03 | 6.86E-06 | 1.16E-05 | 1.67E-05 | 6.12E-05 | 0.8289 | 0.9997 | 0.5902 | 0.8195 |
| 4-guanidinobutanoate                                                    | 500      | 0.98 | 0.84 | 0.9  | 0.77 | 0.7466   | 0.173    | 0.0263   | 0.0265   | 0.1763 | 0.9698 | 0.002  | 0.0302 |
| glutathione, reduced (GSH)                                              | 124886   | 1.07 | 1.18 | 0.95 | 1.05 | 0.9095   | 0.1998   | 0.4474   | 0.2731   | 0.6713 | 0.9841 | 0.6516 | 0.8342 |
| glutathione, oxidized (GSSG)                                            | 65359    | 1.01 | 0.93 | 1.04 | 0.96 | 0.7855   | 0.1795   | 0.074    | 0.0644   | 0.3217 | 0.9698 | 0.2714 | 0.6536 |
| cysteine-glutathione disulfide                                          | 4247235  | 1.51 | 1.37 | 1.12 | 1.02 | 1.21E-05 | 1.86E-05 | 0.0003   | 0.0007   | 0.1655 | 0.9698 | 0.8233 | 0.8662 |
| cysteinylglycine                                                        | 439498   | 1.85 | 2.15 | 0.8  | 0.93 | 0.0175   | 0.0099   | 0.0023   | 0.0039   | 0.3143 | 0.9698 | 0.8415 | 0.8743 |
| 5-oxoproline                                                            | 7405     | 1.19 | 1.16 | 0.97 | 0.95 | 0.0081   | 0.0054   | 0.0281   | 0.0281   | 0.7305 | 0.9841 | 0.3859 | 0.7342 |
| ophthalmate                                                             | 7018721  | 0.38 | 0.38 | 1.08 | 1.1  | 6.19E-10 | 6.00E-09 | 1.29E-09 | 2.24E-08 | 0.5331 | 0.9698 | 0.3524 | 0.7243 |
| gamma-glutamylglutamate                                                 | 92865    | 1.61 | 1.49 | 1.04 | 0.96 | 4.17E-07 | 1.29E-06 | 5.21E-06 | 2.26E-05 | 0.6847 | 0.9841 | 0.5995 | 0.8195 |
| gamma-glutamylglutamine                                                 | 150914   | 1.19 | 1.17 | 0.97 | 0.96 | 0.0027   | 0.0021   | 0.0029   | 0.0045   | 0.4382 | 0.9698 | 0.4203 | 0.7684 |
| gamma-glutamylleucine                                                   | 151023   | 0.76 | 0.94 | 1.07 | 1.34 | 0.008    | 0.0054   | 0.524    | 0.3013   | 0.4365 | 0.9698 | 0.0056 | 0.0546 |
| gamma-glutamylphenylalanine                                             | 111299   | 0.91 | 1.09 | 1.09 | 1.3  | 0.588    | 0.1426   | 0.4897   | 0.2872   | 0.4983 | 0.9698 | 0.0633 | 0.3019 |
| gamma-glutamylthreonine*                                                |          | 0.56 | 0.62 | 1.18 | 1.3  | 3.38E-06 | 6.75E-06 | 5.26E-05 | 0.0002   | 0.1204 | 0.9698 | 0.0144 | 0.1129 |
| gamma-glutamyltyrosine                                                  | 94340    | 0.82 | 0.95 | 1.08 | 1.25 | 0.1264   | 0.0485   | 0.8648   | 0.4039   | 0.652  | 0.9841 | 0.0735 | 0.3337 |
| carnosine                                                               | 439224   | 1.72 | 1.91 | 0.99 | 1.1  | 4.79E-07 | 1.41E-06 | 1.72E-08 | 1.84E-07 | 0.9259 | 0.9997 | 0.2409 | 0.6338 |
| homocarnosine                                                           | 10243361 | 2.31 | 2.52 | 0.92 | 1.01 | 4.35E-10 | 4.92E-09 | 4.68E-11 | 1.63E-09 | 0.3544 | 0.9698 | 0.954  | 0.8846 |
| anserine                                                                | 112072   | 1.26 | 1.27 | 0.98 | 0.98 | 0.0112   | 0.0074   | 0.0088   | 0.0108   | 0.824  | 0.9997 | 0.901  | 0.8846 |
| glycylleucine                                                           | 92843    | 1.26 | 1.14 | 1.23 | 1.11 | 0.1738   | 0.0602   | 0.2386   | 0.1644   | 0.482  | 0.9698 | 0.6065 | 0.8195 |
| serylleucine                                                            | 7015695  | 1.32 | 1.63 | 0.86 | 1.07 | 0.3066   | 0.0909   | 0.1036   | 0.0837   | 0.4859 | 0.9698 | 0.9487 | 0.8846 |
| serylphenylalanine                                                      |          | 1.37 | 1.37 | 1.08 | 1.08 | 0.016    | 0.0095   | 0.0191   | 0.0202   | 0.5395 | 0.9698 | 0.5903 | 0.8195 |
| 1,5-anhydroglucitol (1,5-AG)                                            | 64960    | 0.4  | 1.17 | 0.66 | 1.94 | 0.0017   | 0.0014   | 0.3582   | 0.2308   | 0.1656 | 0.9698 | 0.0059 | 0.0556 |
| glucose                                                                 | 79025    | 0.33 | 0.82 | 0.39 | 0.98 | 0.0164   | 0.0096   | 0.4889   | 0.2872   | 0.0627 | 0.9698 | 0.931  | 0.8846 |
| glucose-6-phosphate (G6P)                                               | 5958     | 0.59 | 0.96 | 0.64 | 1.05 | 0.0065   | 0.0046   | 0.8326   | 0.4018   | 0.0242 | 0.9698 | 0.7328 | 0.849  |
| fructose-6-phosphate                                                    | 69507    | 0.61 | 0.9  | 0.68 | 1.01 | 0.0032   | 0.0024   | 0.45     | 0.2735   | 0.0216 | 0.9698 | 0.9785 | 0.8887 |
| Isobar: fructose 1,6-diphosphate, glucose 1,6-diphosphate, myo-inositol |          | 1.24 | 1.51 | 0.67 | 0.82 | 0.1838   | 0.0621   | 0.2891   | 0.1916   | 0.265  | 0.9698 | 0.1668 | 0.5556 |
| dihydroxyacetone phosphate (DHAP)                                       | 668      | 1.08 | 1.26 | 0.83 | 0.96 | 0.2605   | 0.0815   | 0.0196   | 0.0205   | 0.1137 | 0.9698 | 0.7621 | 0.8511 |
| 1,3-dihydroxyacetone                                                    | 670      | 0.77 | 1.37 | 0.75 | 1.33 | 0.3675   | 0.1027   | 0.4311   | 0.2647   | 0.2211 | 0.9698 | 0.6467 | 0.8342 |
| 3-phosphoglycerate                                                      | 724      | 0.72 | 0.81 | 0.81 | 0.91 | 0.0148   | 0.009    | 0.2186   | 0.1537   | 0.043  | 0.9698 | 0.4422 | 0.7719 |
| lactate                                                                 | 612      | 1.05 | 0.97 | 1.07 | 0.99 | 0.4036   | 0.11     | 0.58     | 0.319    | 0.2524 | 0.9698 | 0.8126 | 0.8662 |
| glycerate                                                               | 752      | 0.88 | 0.71 | 1.08 | 0.87 | 0.3579   | 0.1012   | 0.0084   | 0.0105   | 0.6134 | 0.9841 | 0.1757 | 0.556  |
| ribose 5-phosphate                                                      | 447634   | 1.4  | 1.43 | 0.86 | 0.87 | 0.026    | 0.0134   | 0.0176   | 0.0193   | 0.2099 | 0.9698 | 0.2762 | 0.6579 |
| sedoheptulose-7-phosphate                                               | 616      | 0.68 | 1.12 | 0.64 | 1.05 | 0.0257   | 0.0134   | 0.4764   | 0.2845   | 0.0161 | 0.9698 | 0.6094 | 0.8195 |
| ribulose/xylulose 5-phosphate                                           |          | 1.04 | 1.38 | 0.78 | 1.03 | 0.5216   | 0.1311   | 0.0044   | 0.0061   | 0.0341 | 0.9698 | 0.8245 | 0.8662 |
| ribulose                                                                | 151261   | 1.1  | 1.37 | 0.86 | 1.07 | 0.4181   | 0.1131   | 0.0104   | 0.0123   | 0.1831 | 0.9698 | 0.5808 | 0.8195 |
| ribose                                                                  | 5779     | 1.27 | 1.26 | 0.98 | 0.98 | 0.0287   | 0.0144   | 0.0619   | 0.0555   | 0.8669 | 0.9997 | 0.8486 | 0.8756 |
| ribitol                                                                 | 6912     | 1.09 | 0.94 | 1.01 | 0.87 | 0.3403   | 0.0983   | 0.3602   | 0.231    | 0.9039 | 0.9997 | 0.0862 | 0.3739 |
| xylulose                                                                | 5289590  | 0.9  | 1.05 | 0.89 | 1.04 | 0.6124   | 0.1474   | 0.6114   | 0.3298   | 0.5401 | 0.9698 | 0.6878 | 0.8457 |
| xylonate                                                                | 6602431  | 1.02 | 0.98 | 0.92 | 0.88 | 0.5025   | 0.1278   | 0.9866   | 0.4415   | 0.9176 | 0.9997 | 0.4496 | 0.7719 |
| xylulose                                                                | 135191   | 1.34 | 0.98 | 1.53 | 1.12 | 0.3024   | 0.0903   | 0.1629   | 0.1199   | 0.056  | 0.9698 | 0.6276 | 0.8258 |
| arabinose                                                               | 66308    | 0.81 | 0.79 | 0.85 | 0.83 | 0.0354   | 0.0171   | 0.018    | 0.0193   | 0.1119 | 0.9698 | 0.062  | 0.3011 |
| arabitol                                                                | 94154    | 1.68 | 1.21 | 0.99 | 0.71 | 1.36E-05 | 2.01E-05 | 0.0917   | 0.0773   | 0.9811 | 0.9997 | 0.0014 | 0.0252 |
| maltoepentaose                                                          | 13489094 | 0.97 | 1    | 0.97 | 1    | 0.1683   | 0.0592   | 1        | 0.4432   | 0.1683 | 0.9698 | 1      | 0.8967 |
| maltoetraose                                                            | 446495   | 0.23 | 0.46 | 0.5  | 1    | 0.0006   | 0.0006   | 0.0214   | 0.0221   | 0.1702 | 0.9698 | 1      | 0.8967 |
| maltootriose                                                            | 439586   | 0.32 | 0.46 | 0.8  | 1.14 | 0.0017   | 0.0014   | 0.0104   | 0.0123   | 0.7343 | 0.9841 | 0.7084 | 0.8465 |
| maltose                                                                 | 10991489 | 0.55 | 0.64 | 0.74 | 0.86 | 0.0027   | 0.0021   | 0.0051   | 0.007    | 0.1205 | 0.9698 | 0.1871 | 0.5815 |
| fructose                                                                | 5984     | 1.06 | 1.1  | 0.85 | 0.88 | 0.4942   | 0.1271   | 0.4119   | 0.257    | 0.3853 | 0.9698 | 0.4645 | 0.782  |
| sorbitol                                                                | 5780     | 1.67 | 1.17 | 1.13 | 0.79 | 0.0001   | 0.0001   | 0.1021   | 0.0831   | 0.406  | 0.9698 | 0.0664 | 0.3065 |
| mannose                                                                 | 18950    | 0.61 | 0.76 | 0.84 | 1.05 | 0.0016   | 0.0013   | 0.0491   | 0.0453   | 0.2627 | 0.9698 | 0.762  | 0.8511 |
| mannose-6-phosphate                                                     | 439198   | 0.61 | 0.94 | 0.68 | 1.05 | 0.0029   | 0.0022   | 0.6867   | 0.3591   | 0.0217 | 0.9698 | 0.673  | 0.8451 |
| mannitol                                                                | 6251     | 0.79 | 0.86 | 0.76 | 0.83 | 0.1275   | 0.0486   | 0.5645   | 0.3164   | 0.0854 | 0.9698 | 0.4331 | 0.7719 |
| UDP-galactose                                                           | 18068    | 0.86 | 0.76 | 0.98 | 0.86 | 0.4418   | 0.1176   | 0.1005   | 0.0828   | 0.929  | 0.9997 | 0.3221 | 0.6975 |
| UDP-glucuronate                                                         | 17473    | 0.61 | 0.64 | 0.94 | 0.98 | 4.35E-08 | 1.55E-07 | 2.73E-07 | 1.90E-06 | 0.3312 | 0.9698 | 0.7837 | 0.8532 |
| guanosine 5'-diphospho-fucose                                           |          | 0.87 | 0.8  | 0.96 | 0.88 | 0.0185   | 0.0104   | 0.0001   | 0.0004   | 0.5436 | 0.9698 | 0.0172 | 0.1275 |
| N-acetylglucosamine                                                     | 24139    | 2.42 | 2.3  | 1.21 | 1.15 | 6.43E-06 | 1.12E-05 | 3.00E-06 | 1.44E-05 | 0.6096 | 0.9841 | 0.4322 | 0.7719 |
| N-acetylneuraminate                                                     | 439197   | 0.93 | 0.93 | 0.95 | 0.95 | 0.1491   | 0.0544   | 0.159    | 0.1189   | 0.3311 | 0.9698 | 0.3489 | 0.7243 |
| erythronate*                                                            | 2781043  | 1.34 | 1.4  | 0.89 | 0.94 | 0.0338   | 0.0165   | 0.0075   | 0.0095   | 0.2778 | 0.9698 | 0.6518 | 0.8342 |
| citrate                                                                 | 311      | 0.69 | 1.02 | 0.72 | 1.06 | 0.0732   | 0.0315   | 0.9104   | 0.4162   | 0.1298 | 0.9698 | 0.6821 | 0.8451 |
| cis-aconitate                                                           | 643757   | 0.76 | 0.8  | 0.91 | 0.96 | 0.0132   | 0.0084   | 0.0238   | 0.0244   | 0.4866 | 0.9698 | 0.6584 | 0.8389 |
| succinylcarnitine                                                       |          | 1.51 | 1.71 | 0.87 | 0.98 | 0.017    | 0.0097   | 0.0152   | 0.0169   | 0.5781 | 0.9841 | 0.6112 | 0.8195 |
| succinate                                                               | 1110     | 0.92 | 0.77 | 1.12 | 0.94 | 0.3334   | 0.0968   | 0.0018   | 0.0031   | 0.1259 | 0.9698 | 0.3839 | 0.7342 |
| fumarate                                                                | 444972   | 0.75 | 0.88 | 0.88 | 1.03 | 0.0063   | 0.0045   | 0.1611   | 0.1192   | 0.2569 | 0.9698 | 0.7258 | 0.8479 |
| malate                                                                  | 525      | 1.02 | 1.09 | 0.95 | 1.03 | 0.7586   | 0.1752   | 0.2398   | 0.1644   | 0.5423 | 0.9698 | 0.7862 | 0.8532 |
| pyrophosphate (PPi)                                                     | 644102   | 1.23 | 1.15 | 1.01 | 0.95 | 0.4756   | 0.1232   | 0.9355   | 0.4254   | 0.8782 | 0.9997 | 0.4326 | 0.7719 |
| phosphate                                                               | 1061     | 1.05 | 1    | 1.02 | 0.97 | 0.0506   | 0.0229   | 0.8561   | 0.4039   | 0.4184 | 0.9698 | 0.308  | 0.6792 |
| caproate (6:0)                                                          | 8892     | 0.78 | 0.65 | 1.04 | 0.87 | 0.0149   | 0.009    | 0.0001   | 0.0003   | 0.6369 | 0.9841 | 0.1701 | 0.5556 |
| pelargonate (9:0)                                                       | 8158     | 0.92 | 0.97 | 1.01 | 1.07 | 0.1827   | 0.062    | 0.5623   | 0.3164   | 0.8286 | 0.9997 | 0.3266 | 0.7019 |
| myristate (14:0)                                                        | 11005    | 0.69 | 0.85 | 1    | 1.23 | 3.63E-06 | 7.05E-06 | 0.0142   | 0.0159   | 0.9509 | 0.9997 | 0.0035 | 0.0391 |
| myristoleate (14:1n5)                                                   | 5281119  | 0.65 | 0.79 | 1.03 | 1.26 | 0.0408   | 0.0192   | 0.1409   | 0.1066   | 0.7811 | 0.9997 | 0.3704 | 0.7342 |
| pentadecanoate (15:0)                                                   | 13849    | 0.91 | 0.9  | 1.02 | 1    | 0.3558   | 0.1011   | 0.2366   | 0.1638   | 0.8415 | 0.9997 | 0.9458 | 0.8846 |
| palmitate (16:0)                                                        | 985      | 1.14 | 1.13 | 1.04 | 1.04 | 0.0308   | 0.0152   | 0.0395   | 0.0374   | 0.4594 | 0.9698 | 0.53   | 0.8024 |
| palmitoleate (16:1n7)                                                   | 445638   | 0.69 | 0.89 | 0.94 | 1.23 | 0.0001   | 0.0001   | 0.1605   | 0.1192   | 0.5332 | 0.9698 | 0.0265 | 0.1657 |
| margarate (17:0)                                                        | 10465    | 1.08 | 1.09 | 0.89 | 0.9  | 0.1707   | 0.0594   | 0.1161   | 0.0918   | 0.0662 | 0.9698 | 0.101  | 0.4068 |
| 10-heptadecenoate (17:1n7)                                              | 5312435  | 0.93 | 1.03 | 0.79 | 0.88 | 0.4398   | 0.1175   | 0.7382   | 0.3722   | 0.0157 | 0.9698 | 0.158  | 0.54   |

|                                                    |          |      |      |      |      |          |          |          |          |        |        |          |        |
|----------------------------------------------------|----------|------|------|------|------|----------|----------|----------|----------|--------|--------|----------|--------|
| stearate (18:0)                                    | 5281     | 1.23 | 1.19 | 1.08 | 1.05 | 0.0021   | 0.0017   | 0.0074   | 0.0095   | 0.212  | 0.9698 | 0.4472   | 0.7719 |
| oleate (18:1n9)                                    | 445639   | 1.29 | 1.31 | 1    | 1.02 | 2.60E-05 | 3.46E-05 | 9.57E-06 | 3.92E-05 | 0.9753 | 0.9997 | 0.6939   | 0.8465 |
| cis-vaccenate (18:1n7)                             | 5282761  | 1.38 | 1.35 | 1.01 | 0.98 | 0.0001   | 0.0002   | 0.0003   | 0.0007   | 0.9263 | 0.9997 | 0.8843   | 0.8772 |
| nonadecanoate (19:0)                               | 12591    | 1.26 | 1.22 | 0.93 | 0.9  | 0.0227   | 0.0122   | 0.0173   | 0.0191   | 0.2556 | 0.9698 | 0.3067   | 0.6792 |
| 10-nonadecenoate (19:1n9)                          | 5312513  | 1.84 | 1.61 | 0.86 | 0.75 | 1.50E-05 | 2.17E-05 | 0.0004   | 0.0008   | 0.2373 | 0.9698 | 0.0234   | 0.1535 |
| arachidate (20:0)                                  | 10467    | 1.27 | 1.21 | 1.04 | 0.98 | 0.0015   | 0.0013   | 0.0089   | 0.0109   | 0.5711 | 0.9839 | 0.9021   | 0.8846 |
| eicosenoate (20:1n9 or 11)                         | 5282768  | 1.62 | 1.71 | 0.99 | 1.05 | 1.03E-05 | 1.70E-05 | 1.83E-06 | 9.09E-06 | 0.9921 | 0.9997 | 0.5236   | 0.7996 |
| erucate (22:1n9)                                   | 5281116  | 1.83 | 1.94 | 0.97 | 1.03 | 1.90E-06 | 4.31E-06 | 6.53E-07 | 3.95E-06 | 0.9862 | 0.9997 | 0.6794   | 0.8451 |
| lignocerate (24:0)                                 | 11197    | 1.25 | 1.63 | 0.83 | 1.07 | 0.0443   | 0.0202   | 0.0012   | 0.0022   | 0.348  | 0.9698 | 0.5912   | 0.8195 |
| eicosapentaenoate (EPA; 20:5n3)                    | 446284   | 0.84 | 1.11 | 0.92 | 1.21 | 0.4262   | 0.1144   | 0.6274   | 0.3358   | 0.6742 | 0.9841 | 0.3898   | 0.736  |
| docosapentaenoate (n3 DPA; 22:5n3)                 | 6441454  | 1.04 | 1.37 | 0.77 | 1.01 | 0.7219   | 0.1684   | 0.0682   | 0.0601   | 0.1179 | 0.9698 | 0.9397   | 0.8846 |
| docosahexaenoate (DHA; 22:6n3)                     | 445580   | 1.19 | 1.45 | 0.87 | 1.05 | 0.0854   | 0.0356   | 0.0041   | 0.0059   | 0.3152 | 0.9698 | 0.751    | 0.8511 |
| linoleate (18:2n6)                                 | 5280450  | 0.87 | 0.98 | 0.92 | 1.04 | 0.3489   | 0.0999   | 0.7528   | 0.3768   | 0.7309 | 0.9841 | 0.776    | 0.8532 |
| linolenate [alpha or gamma; (18:3n3 or 6)]         | 5280934  | 0.68 | 0.93 | 0.84 | 1.14 | 0.013    | 0.0084   | 0.4244   | 0.2625   | 0.2707 | 0.9698 | 0.4777   | 0.782  |
| dihomo-linolenate (20:3n3 or n6)                   | 5280581  | 0.92 | 1.05 | 0.91 | 1.04 | 0.5248   | 0.1315   | 0.6177   | 0.3319   | 0.3828 | 0.9698 | 0.7952   | 0.8546 |
| arachidonate (20:4n6)                              | 444899   | 1.24 | 1.4  | 0.96 | 1.09 | 0.0253   | 0.0133   | 0.0019   | 0.0033   | 0.7509 | 0.9866 | 0.4674   | 0.782  |
| adrenate (22:4n6)                                  | 5497181  | 1.03 | 0.97 | 0.92 | 0.87 | 0.8494   | 0.1897   | 0.8345   | 0.4018   | 0.7397 | 0.9841 | 0.4666   | 0.782  |
| docosapentaenoate (n6 DPA; 22:5n6)                 | 6441454  | 0.83 | 0.96 | 0.82 | 0.96 | 0.1786   | 0.0611   | 0.6089   | 0.3297   | 0.172  | 0.9698 | 0.5938   | 0.8195 |
| docosadienoate (22:2n6)                            | 5282807  | 1.17 | 1.18 | 0.97 | 0.99 | 0.117    | 0.0454   | 0.1141   | 0.0907   | 0.9741 | 0.9997 | 0.985    | 0.8889 |
| dihomo-linoleate (20:2n6)                          | 6439848  | 1.06 | 0.97 | 0.98 | 0.89 | 0.4718   | 0.123    | 0.7425   | 0.373    | 0.9441 | 0.9997 | 0.2672   | 0.6536 |
| mead acid (20:3n9)                                 | 5312531  | 0.72 | 0.96 | 0.92 | 1.22 | 0.0443   | 0.0202   | 0.847    | 0.4034   | 0.49   | 0.9698 | 0.2357   | 0.6321 |
| 15-methylpalmitate (isobar with 2-methylpalmitate) | 17903417 | 1.05 | 0.96 | 1.03 | 0.94 | 0.5854   | 0.1424   | 0.5718   | 0.317    | 0.6799 | 0.9841 | 0.4854   | 0.79   |
| 2-hydroxyglutarate                                 | 43       | 0.94 | 1.05 | 0.93 | 1.04 | 0.3026   | 0.0903   | 0.4056   | 0.255    | 0.2036 | 0.9698 | 0.558    | 0.8195 |
| palmitic amide                                     | 69421    | 0.82 | 0.76 | 0.99 | 0.91 | 0.2141   | 0.0699   | 0.0485   | 0.045    | 0.9765 | 0.9997 | 0.4185   | 0.7684 |
| oleamide                                           | 5283387  | 0.48 | 0.36 | 0.92 | 0.68 | 0.1872   | 0.0629   | 0.0064   | 0.0083   | 0.7879 | 0.9997 | 0.1958   | 0.5815 |
| stearamide                                         | 31292    | 0.46 | 0.38 | 0.89 | 0.73 | 0.0279   | 0.0142   | 0.0012   | 0.0022   | 0.9673 | 0.9997 | 0.1968   | 0.5815 |
| butyrylcarnitine                                   | 439829   | 0.98 | 1.43 | 1    | 1.46 | 0.8235   | 0.187    | 0.0044   | 0.0061   | 0.7896 | 0.9997 | 0.0049   | 0.0508 |
| propionylcarnitine                                 | 107738   | 1.63 | 2.07 | 1.01 | 1.28 | 2.91E-05 | 3.57E-05 | 5.07E-08 | 3.92E-07 | 0.9355 | 0.9997 | 0.0201   | 0.1413 |
| acetylcarnitine                                    | 1        | 1.03 | 1.31 | 1.04 | 1.32 | 0.6637   | 0.1581   | 3.13E-05 | 0.0001   | 0.4915 | 0.9698 | 1.55E-05 | 0.0016 |
| hydroxybutyrylcarnitine*                           | 53481617 | 0.35 | 0.82 | 1.03 | 2.41 | 3.87E-05 | 4.53E-05 | 0.2415   | 0.1647   | 0.997  | 0.9997 | 0.001    | 0.0186 |
| palmitoylcarnitine                                 | 461      | 1.35 | 1.04 | 0.96 | 0.74 | 0.505    | 0.1279   | 0.8992   | 0.4143   | 0.7159 | 0.9841 | 0.2516   | 0.6439 |
| deoxycarnitine                                     | 134      | 1.06 | 0.86 | 0.97 | 0.78 | 0.3904   | 0.1073   | 0.0311   | 0.0305   | 0.7378 | 0.9841 | 0.0017   | 0.0275 |
| carnitine                                          | 10917    | 1.38 | 1.74 | 0.97 | 1.22 | 4.06E-06 | 7.65E-06 | 2.00E-10 | 3.97E-09 | 0.5623 | 0.9839 | 0.0021   | 0.0302 |
| 3-dehydrocarnitine*                                | 6991982  | 1.08 | 1.47 | 0.94 | 1.28 | 0.3151   | 0.0926   | 4.98E-05 | 0.0002   | 0.4629 | 0.9698 | 0.0054   | 0.0539 |
| 3-hydroxybutyrate (BHBA)                           | 441      | 0.47 | 0.54 | 1.23 | 1.42 | 0.0027   | 0.0021   | 0.0022   | 0.0037   | 0.1706 | 0.9698 | 0.1938   | 0.5815 |
| 2-hydroxypalmitate                                 | 92836    | 0.75 | 0.73 | 1.13 | 1.1  | 0.014    | 0.0089   | 0.0182   | 0.0193   | 0.4383 | 0.9698 | 0.3764   | 0.7342 |
| 2-hydroxystearate                                  | 69417    | 0.97 | 0.77 | 1.16 | 0.92 | 0.7785   | 0.1785   | 0.078    | 0.067    | 0.3391 | 0.9698 | 0.5715   | 0.8195 |
| prostaglandin E2                                   | 5280360  | 0.75 | 1    | 0.88 | 1.16 | 0.2139   | 0.0699   | 0.9721   | 0.4364   | 0.8274 | 0.9997 | 0.2863   | 0.6627 |
| prostaglandin D2                                   | 448457   | 0.63 | 1.03 | 0.82 | 1.35 | 0.3242   | 0.0949   | 0.8298   | 0.4018   | 0.8616 | 0.9997 | 0.1735   | 0.5556 |
| 5-HETE                                             | 5280733  | 1.17 | 1.1  | 1.07 | 1.01 | 0.1758   | 0.0606   | 0.3325   | 0.2172   | 0.5072 | 0.9698 | 0.79     | 0.8532 |
| 12-HETE                                            | 5312983  | 1.18 | 1.55 | 1.1  | 1.45 | 0.0994   | 0.0407   | 0.0002   | 0.0004   | 0.3106 | 0.9698 | 0.0009   | 0.0186 |
| 15-HETE                                            | 5280724  | 1    | 1.01 | 1.05 | 1.06 | 0.9553   | 0.2092   | 0.8629   | 0.4039   | 0.5109 | 0.9698 | 0.3775   | 0.7342 |
| oleic ethanolamide                                 | 5283454  | 1.9  | 1.65 | 1.05 | 0.92 | 0.0002   | 0.0002   | 0.0032   | 0.0048   | 0.5107 | 0.9698 | 0.6276   | 0.8258 |
| palmitoyl ethanolamide                             | 4671     | 1.96 | 1.84 | 0.99 | 0.93 | 8.56E-07 | 2.23E-06 | 4.25E-06 | 1.96E-05 | 0.977  | 0.9997 | 0.5756   | 0.8195 |
| myo-inositol                                       | 892      | 1.24 | 1.29 | 0.89 | 0.93 | 0.001    | 0.0008   | 0.0004   | 0.0008   | 0.1374 | 0.9698 | 0.2508   | 0.6439 |
| chiro-inositol                                     |          | 2.73 | 3.17 | 0.82 | 0.95 | 0.0002   | 0.0002   | 0.0006   | 0.0012   | 0.9359 | 0.9997 | 0.6181   | 0.8213 |
| scyllo-inositol                                    | 892      | 1.24 | 1.34 | 0.96 | 1.03 | 0.0145   | 0.009    | 0.0009   | 0.0017   | 0.4824 | 0.9698 | 0.6967   | 0.8465 |
| inositol 1-phosphate (1P)                          | 440194   | 0.9  | 0.92 | 0.96 | 0.98 | 0.1682   | 0.0592   | 0.2099   | 0.1483   | 0.6675 | 0.9841 | 0.7643   | 0.8511 |
| inositol 2-phosphate (2P)                          |          | 0.81 | 0.82 | 0.86 | 0.88 | 0.1791   | 0.0611   | 0.1357   | 0.1032   | 0.3313 | 0.9698 | 0.2613   | 0.6536 |
| inositol 4-phosphate                               | 440043   | 1.07 | 1.32 | 0.61 | 0.76 | 0.272    | 0.0843   | 0.4224   | 0.2624   | 0.4044 | 0.9698 | 0.2587   | 0.6536 |
| choline                                            | 305      | 1.22 | 1.25 | 0.99 | 1.02 | 5.40E-08 | 1.75E-07 | 5.68E-09 | 7.90E-08 | 0.7209 | 0.9841 | 0.5923   | 0.8195 |
| choline phosphate                                  | 1014     | 0.62 | 0.56 | 1.05 | 0.94 | 2.21E-09 | 1.50E-08 | 2.36E-11 | 1.09E-09 | 0.4213 | 0.9698 | 0.2407   | 0.6338 |
| cytidine 5'-diphosphocholine                       | 13804    | 1    | 0.77 | 1.22 | 0.95 | 0.5328   | 0.133    | 0.0441   | 0.0412   | 0.031  | 0.9698 | 0.643    | 0.8342 |
| glycerophosphorylcholine (GPC)                     | 71920    | 2.5  | 1.8  | 1.03 | 0.74 | 1.17E-05 | 1.85E-05 | 0.0026   | 0.0042   | 0.8105 | 0.9997 | 0.0877   | 0.3743 |
| ethanolamine                                       | 700      | 0.78 | 0.75 | 1.06 | 1.01 | 0.0022   | 0.0018   | 0.0005   | 0.0009   | 0.4445 | 0.9698 | 0.8614   | 0.8756 |
| phosphoethanolamine                                | 1015     | 0.49 | 0.49 | 0.99 | 0.99 | 2.54E-10 | 3.44E-09 | 1.70E-10 | 3.94E-09 | 0.9997 | 0.9997 | 0.86     | 0.8756 |
| cytidine-5'-diphosphoethanolamine                  | 123727   | 0.6  | 0.72 | 0.85 | 1.01 | 2.85E-05 | 3.57E-05 | 0.0014   | 0.0024   | 0.1999 | 0.9698 | 0.9012   | 0.8846 |
| glycerophosphoethanolamine                         | 123874   | 3.46 | 2.74 | 0.94 | 0.75 | 6.01E-05 | 6.91E-05 | 0.0003   | 0.0007   | 0.6607 | 0.9841 | 0.3088   | 0.6792 |
| 1-palmitoylglycerophosphocholine (16:0)            | 86554    | 1.79 | 1.06 | 1.12 | 0.66 | 0.2177   | 0.0707   | 0.8532   | 0.4039   | 0.7221 | 0.9841 | 0.2857   | 0.6627 |
| 2-palmitoylglycerophosphocholine*                  | 15061532 | 2.03 | 1.11 | 1.25 | 0.68 | 0.1129   | 0.0441   | 0.9121   | 0.4162   | 0.5709 | 0.9839 | 0.2501   | 0.6439 |
| 1-palmitoleoylglycerophosphocholine (16:1)*        | 24779461 | 0.99 | 0.5  | 1.4  | 0.71 | 0.7724   | 0.1778   | 0.0054   | 0.0073   | 0.2341 | 0.9698 | 0.1432   | 0.5105 |
| 1-stearoylglycerophosphocholine (18:0)             | 497299   | 1.85 | 1.33 | 0.95 | 0.69 | 0.2782   | 0.0855   | 0.6604   | 0.3508   | 0.9163 | 0.9997 | 0.4491   | 0.7719 |
| 1-oleoylglycerophosphocholine (18:1)               | 16081932 | 1.89 | 1.09 | 1.15 | 0.66 | 0.1104   | 0.0435   | 0.9917   | 0.4423   | 0.6095 | 0.9841 | 0.2716   | 0.6536 |
| 2-oleoylglycerophosphocholine*                     |          | 1.44 | 1.19 | 0.94 | 0.78 | 0.1108   | 0.0435   | 0.787    | 0.3911   | 0.9426 | 0.9997 | 0.1592   | 0.54   |
| 2-arachidonoylglycerophosphocholine*               |          | 1.56 | 1.06 | 1.27 | 0.87 | 0.2105   | 0.0694   | 0.6889   | 0.3591   | 0.2669 | 0.9698 | 0.5845   | 0.8195 |
| 1-docosahexaenoylglycerophosphocholine (22:6n3)*   |          | 1.58 | 1.71 | 1.03 | 1.12 | 0.0117   | 0.0076   | 0.0029   | 0.0045   | 0.848  | 0.9997 | 0.4559   | 0.778  |
| 2-docosahexaenoylglycerophosphocholine*            |          | 1.79 | 1.37 | 1.11 | 0.85 | 0.1362   | 0.0514   | 0.379    | 0.2397   | 0.7326 | 0.9841 | 0.77     | 0.8511 |
| 1-palmitoylplasmylethanolamine*                    |          | 0.93 | 1    | 1.14 | 1.23 | 0.8362   | 0.188    | 0.8494   | 0.4034   | 0.4855 | 0.9698 | 0.4752   | 0.782  |
| 1-stearoylplasmylethanolamine*                     |          | 1.28 | 1.56 | 0.99 | 1.21 | 0.2589   | 0.0815   | 0.0739   | 0.0644   | 0.8582 | 0.9997 | 0.6046   | 0.8195 |
| 1-oleoylplasmylethanolamine*                       |          | 1.11 | 1.48 | 1.15 | 1.53 | 0.4987   | 0.1275   | 0.2804   | 0.1867   | 0.4277 | 0.9698 | 0.2326   | 0.6321 |
| 1-palmitoylglycerophosphoethanolamine              | 9547069  | 0.84 | 0.79 | 1.21 | 1.13 | 0.3335   | 0.0968   | 0.1785   | 0.1294   | 0.4455 | 0.9698 | 0.7083   | 0.8465 |
| 2-palmitoylglycerophosphoethanolamine*             |          | 1.99 | 1.27 | 1.17 | 0.75 | 0.1052   | 0.0423   | 0.5459   | 0.3101   | 0.7967 | 0.9997 | 0.4287   | 0.7719 |
| 1-stearoylglycerophosphoethanolamine               | 9547068  | 1.68 | 1.12 | 1.08 | 0.72 | 0.4071   | 0.1105   | 0.9023   | 0.4144   | 0.9708 | 0.9997 | 0.5016   | 0.7996 |

|                                                   |          |       |      |      |      |          |          |          |          |        |        |          |        |
|---------------------------------------------------|----------|-------|------|------|------|----------|----------|----------|----------|--------|--------|----------|--------|
| 1-oleoylglycerophosphoethanolamine                | 9547071  | 1.13  | 1.09 | 1.19 | 1.14 | 0.5498   | 0.1367   | 0.7946   | 0.3935   | 0.4275 | 0.9698 | 0.6472   | 0.8342 |
| 2-oleoylglycerophosphoethanolamine*               |          | 1.43  | 1.42 | 1.21 | 1.2  | 0.0653   | 0.0286   | 0.151    | 0.1136   | 0.296  | 0.9698 | 0.5388   | 0.8069 |
| 1-palmitoleoylglycerophosphoethanolamine*         |          | 0.73  | 0.74 | 1.36 | 1.39 | 0.1037   | 0.0419   | 0.266    | 0.178    | 0.2487 | 0.9698 | 0.0955   | 0.4014 |
| 2-palmitoleoylglycerophosphoethanolamine*         |          | 0.98  | 1.14 | 0.98 | 1.14 | 0.7077   | 0.1668   | 0.4927   | 0.2872   | 0.987  | 0.9997 | 0.7664   | 0.8511 |
| 2-linoleoylglycerophosphoethanolamine*            |          | 1.68  | 1.13 | 0.9  | 0.6  | 0.0427   | 0.0197   | 0.7199   | 0.3664   | 0.8471 | 0.9997 | 0.0606   | 0.2994 |
| 1-arachidonoylglycerophosphoethanolamine*         | 42607465 | 0.86  | 0.97 | 1.15 | 1.3  | 0.423    | 0.1139   | 0.8141   | 0.4003   | 0.4978 | 0.9698 | 0.2171   | 0.6072 |
| 2-arachidonoylglycerophosphoethanolamine*         |          | 1.68  | 1.14 | 1.02 | 0.69 | 0.0815   | 0.0341   | 0.8376   | 0.4019   | 0.8825 | 0.9997 | 0.1578   | 0.54   |
| 2-docosapentaenoylglycerophosphoethanolamine*     |          | 1.39  | 1.26 | 0.97 | 0.88 | 0.4456   | 0.1182   | 0.3707   | 0.2355   | 0.7126 | 0.9841 | 0.8151   | 0.8662 |
| 2-docosahexaenoylglycerophosphoethanolamine*      |          | 1.65  | 1.22 | 0.98 | 0.73 | 0.138    | 0.0518   | 0.6339   | 0.338    | 0.9686 | 0.9997 | 0.2871   | 0.6627 |
| 1-docosahexaenoylglycerophosphoethanolamine*      |          | 0.99  | 1.15 | 1.11 | 1.29 | 0.9922   | 0.2155   | 0.4654   | 0.2804   | 0.6461 | 0.9841 | 0.2348   | 0.6321 |
| 1-eicosenoylglycerophosphoethanolamine (20:1n9)*  |          | 1.34  | 1.97 | 0.94 | 1.39 | 0.2092   | 0.0693   | 0.0438   | 0.0411   | 0.8686 | 0.9997 | 0.515    | 0.7996 |
| 1-palmitoylglycerophosphoinositol*                |          | 0.85  | 1.06 | 0.89 | 1.12 | 0.9039   | 0.1992   | 0.8719   | 0.4045   | 0.9366 | 0.9997 | 0.718    | 0.8465 |
| 1-stearoylglycerophosphoinositol                  |          | 0.97  | 0.87 | 1.27 | 1.14 | 0.9975   | 0.2156   | 0.5381   | 0.3082   | 0.3017 | 0.9698 | 0.6736   | 0.8451 |
| 2-stearoylglycerophosphoinositol*                 |          | 1.1   | 0.86 | 1.3  | 1.02 | 0.5081   | 0.1282   | 0.4596   | 0.2781   | 0.1787 | 0.9698 | 0.9677   | 0.8846 |
| 1-oleoylglycerophosphoinositol*                   |          | 0.69  | 0.71 | 0.82 | 0.84 | 0.2294   | 0.0731   | 0.0986   | 0.0817   | 0.6506 | 0.9841 | 0.3564   | 0.7268 |
| 1-arachidonoylglycerophosphoinositol*             |          | 1.42  | 1.36 | 1.18 | 1.13 | 0.0422   | 0.0196   | 0.0907   | 0.0769   | 0.3151 | 0.9698 | 0.5234   | 0.7996 |
| 2-arachidonoylglycerophosphoinositol*             |          | 1.44  | 1.42 | 1.09 | 1.08 | 0.0519   | 0.0233   | 0.0901   | 0.0769   | 0.5734 | 0.9839 | 0.7708   | 0.8511 |
| 1-stearoylglycerophosphoserine*                   | 9547101  | 0.86  | 0.79 | 1.11 | 1.03 | 0.2275   | 0.0731   | 0.0747   | 0.0646   | 0.4065 | 0.9698 | 0.8232   | 0.8662 |
| 1-oleoylglycerophosphoserine                      | 9547099  | 1.03  | 1.07 | 1.05 | 1.09 | 0.8783   | 0.1948   | 0.5684   | 0.3164   | 0.6826 | 0.9841 | 0.4103   | 0.7599 |
| 2-oleoylglycerophosphoserine*                     |          | 1.41  | 1.19 | 1.23 | 1.04 | 0.0419   | 0.0196   | 0.2523   | 0.1705   | 0.3229 | 0.9698 | 0.9663   | 0.8846 |
| 1-palmitoylglycerophosphoglycerol*                | 3300276  | 0.91  | 1.28 | 0.7  | 0.98 | 0.8083   | 0.1841   | 0.3286   | 0.2157   | 0.2873 | 0.9698 | 0.7397   | 0.8501 |
| 1-palmitoylglycerophosphoserine*                  | 9547100  | 0.75  | 0.6  | 1.29 | 1.02 | 0.0288   | 0.0144   | 0.0003   | 0.0007   | 0.0482 | 0.9698 | 0.7909   | 0.8532 |
| 1-oleoylglycerophosphoglycerol*                   |          | 1.09  | 1.52 | 0.77 | 1.07 | 0.3032   | 0.0903   | 0.018    | 0.0193   | 0.21   | 0.9698 | 0.858    | 0.8756 |
| 2-oleoylglycerophosphoglycerol*                   |          | 1.46  | 2.09 | 0.88 | 1.26 | 0.0599   | 0.0266   | 0.004    | 0.0059   | 0.9134 | 0.9997 | 0.2959   | 0.6718 |
| glycerol                                          | 753      | 1.24  | 1.16 | 1.06 | 0.99 | 0.0002   | 0.0002   | 0.0079   | 0.0099   | 0.2317 | 0.9698 | 0.8699   | 0.8759 |
| glycerol 3-phosphate (G3P)                        | 754      | 1.2   | 0.83 | 1.04 | 0.72 | 0.0246   | 0.0131   | 0.032    | 0.0311   | 0.5382 | 0.9698 | 0.0004   | 0.0115 |
| 1-myristoylglycerol (1-monomyristin)              | 79050    | 0.75  | 0.86 | 0.83 | 0.95 | 0.1561   | 0.0564   | 0.4755   | 0.2845   | 0.3831 | 0.9698 | 0.8804   | 0.8772 |
| 1-palmitoylglycerol (1-monopalmitin)              | 14900    | 0.98  | 1.03 | 0.92 | 0.97 | 0.886    | 0.1959   | 0.7048   | 0.3633   | 0.379  | 0.9698 | 0.7168   | 0.8465 |
| 2-palmitoylglycerol (2-monopalmitin)              | 123409   | 1.18  | 1.04 | 1.14 | 1.01 | 0.229    | 0.0731   | 0.7221   | 0.3664   | 0.2226 | 0.9698 | 0.7091   | 0.8465 |
| 1-stearoylglycerol (1-monostearin)                | 24699    | 0.94  | 0.88 | 1    | 0.94 | 0.4729   | 0.123    | 0.1304   | 0.0997   | 0.9553 | 0.9997 | 0.4452   | 0.7719 |
| 1-oleoylglycerol (1-monoolein)                    | 5283468  | 1.18  | 1.64 | 0.84 | 1.16 | 0.2903   | 0.0876   | 0.0016   | 0.0028   | 0.1898 | 0.9698 | 0.2936   | 0.6718 |
| 2-oleoylglycerol (2-monoolein)                    | 5319879  | 0.81  | 1.03 | 0.84 | 1.07 | 0.3882   | 0.1071   | 0.827    | 0.4018   | 0.5143 | 0.9698 | 0.6658   | 0.8444 |
| 1-linoleoylglycerol (1-monolinolein)              | 5283469  | 0.98  | 1.06 | 0.91 | 0.99 | 0.8668   | 0.1929   | 0.8709   | 0.4045   | 0.6969 | 0.9841 | 0.9523   | 0.8846 |
| 2-linoleoylglycerol (2-monolinolein)              | 5365676  | 1.08  | 1.59 | 0.64 | 0.93 | 0.7068   | 0.1668   | 0.0391   | 0.0373   | 0.0366 | 0.9698 | 0.6843   | 0.8451 |
| 1-arachidonoylglycerol                            | 5282281  | 1.59  | 1.37 | 1.17 | 1.01 | 0.0029   | 0.0022   | 0.0328   | 0.0317   | 0.2711 | 0.9698 | 0.9189   | 0.8846 |
| 2-arachidonoyl glycerol                           | 5282280  | 1.35  | 1.49 | 0.93 | 1.02 | 0.1443   | 0.053    | 0.0131   | 0.0149   | 0.4373 | 0.9698 | 0.7212   | 0.8465 |
| 1-docosahexaenoylglycerol (1-monodocosahexaenoin) |          | 0.93  | 1.02 | 0.89 | 0.98 | 0.7248   | 0.1685   | 0.6738   | 0.3561   | 0.3336 | 0.9698 | 0.8409   | 0.8743 |
| 1,2-dipalmitoylglycerol                           | 99931    | 0.93  | 1.15 | 0.91 | 1.11 | 0.9773   | 0.2133   | 0.4933   | 0.2872   | 0.7195 | 0.9841 | 0.7215   | 0.8465 |
| 1,3-dipalmitoylglycerol                           | 68149    | 1.23  | 1.74 | 0.71 | 0.99 | 0.1579   | 0.0567   | 0.0092   | 0.0111   | 0.2399 | 0.9698 | 0.8848   | 0.8772 |
| palmitoyl sphingomyelin                           | 9939941  | 0.74  | 0.84 | 1    | 1.15 | 0.0002   | 0.0002   | 0.0137   | 0.0156   | 0.8112 | 0.9997 | 0.0658   | 0.3065 |
| stearoyl sphingomyelin                            | 6453725  | 1.12  | 1.12 | 0.92 | 0.92 | 0.1208   | 0.0466   | 0.1683   | 0.1226   | 0.2863 | 0.9698 | 0.2135   | 0.6072 |
| lanosterol                                        | 246983   | 1.16  | 0.53 | 1.07 | 0.49 | 0.3113   | 0.0919   | 0.0001   | 0.0003   | 0.6179 | 0.9841 | 2.81E-05 | 0.0016 |
| lathosterol                                       | 65728    | 0.78  | 0.68 | 0.93 | 0.81 | 0.0286   | 0.0144   | 0.0006   | 0.0012   | 0.5417 | 0.9698 | 0.04     | 0.2211 |
| desmosterol                                       | 439577   | 0.28  | 0.32 | 0.98 | 1.12 | 3.28E-09 | 2.02E-08 | 8.95E-08 | 6.55E-07 | 0.9285 | 0.9997 | 0.2269   | 0.6263 |
| cholesterol                                       | 11025495 | 1.01  | 1.13 | 0.9  | 1.01 | 0.8348   | 0.188    | 0.0534   | 0.0486   | 0.0902 | 0.9698 | 0.9596   | 0.8846 |
| 7-alpha-hydroxycholesterol                        | 107722   | 0.74  | 0.67 | 0.97 | 0.87 | 0.0297   | 0.0147   | 0.0052   | 0.0071   | 0.8834 | 0.9997 | 0.3811   | 0.7342 |
| 7-beta-hydroxycholesterol                         | 473141   | 0.88  | 0.75 | 1.05 | 0.9  | 0.2854   | 0.0865   | 0.0101   | 0.0121   | 0.4663 | 0.9698 | 0.3588   | 0.7268 |
| campesterol                                       | 173183   | 0.66  | 0.65 | 1.13 | 1.11 | 2.37E-05 | 3.21E-05 | 1.93E-05 | 6.90E-05 | 0.1687 | 0.9698 | 0.1913   | 0.5815 |
| corticosterone                                    | 5753     | 2.04  | 3.31 | 0.98 | 1.59 | 5.28E-06 | 9.42E-06 | 1.19E-10 | 3.30E-09 | 0.8791 | 0.9997 | 0.0003   | 0.01   |
| taurocholate                                      | 6675     | 0.55  | 0.5  | 1.13 | 1.03 | 0.0141   | 0.0089   | 0.0044   | 0.0061   | 0.4916 | 0.9698 | 0.8318   | 0.8707 |
| tauro(alpha + beta)muricholate                    | 168408   | 1.22  | 1.03 | 1.16 | 0.98 | 0.4534   | 0.1198   | 0.969    | 0.4364   | 0.41   | 0.9698 | 0.9708   | 0.8846 |
| inosine                                           | 6021     | 0.97  | 0.94 | 0.99 | 0.96 | 0.3552   | 0.1011   | 0.0303   | 0.0302   | 0.8516 | 0.9997 | 0.1373   | 0.4954 |
| hypoxanthine                                      | 790      | 0.98  | 0.97 | 1.08 | 1.08 | 0.5634   | 0.1391   | 0.4813   | 0.285    | 0.0404 | 0.9698 | 0.053    | 0.2762 |
| xanthine                                          | 1188     | 1.02  | 1.04 | 1.02 | 1.05 | 0.6098   | 0.1473   | 0.2061   | 0.1463   | 0.5416 | 0.9698 | 0.1737   | 0.5556 |
| xanthosine                                        | 64959    | 1.18  | 1.15 | 1.04 | 1.01 | 0.1426   | 0.0529   | 0.1885   | 0.1359   | 0.7484 | 0.9866 | 0.8716   | 0.8759 |
| urate                                             | 1175     | 1.1   | 1.9  | 1.18 | 2.04 | 0.3643   | 0.1022   | 0.0029   | 0.0045   | 0.3598 | 0.9698 | 0.0028   | 0.0346 |
| allantoin                                         | 204      | 0.55  | 0.76 | 0.89 | 1.23 | 0.0005   | 0.0004   | 0.0678   | 0.0601   | 0.5223 | 0.9698 | 0.1678   | 0.5556 |
| adenosine 5'-triphosphate (ATP)                   | 5957     | 1.22  | 1.47 | 0.92 | 1.11 | 0.1707   | 0.0594   | 0.031    | 0.0305   | 0.7024 | 0.9841 | 0.6352   | 0.8319 |
| adenosine 5'-diphosphate (ADP)                    | 6022     | 1.02  | 0.86 | 0.89 | 0.75 | 0.9937   | 0.2155   | 0.2049   | 0.1462   | 0.2888 | 0.9698 | 0.0248   | 0.159  |
| adenosine 5'-monophosphate (AMP)                  | 6083     | 1.1   | 1.1  | 0.98 | 0.98 | 0.1016   | 0.0413   | 0.1205   | 0.0937   | 0.7694 | 0.9997 | 0.7014   | 0.8465 |
| adenosine 2'-monophosphate (2'-AMP)               | 94136    | 0.83  | 1    | 0.99 | 1.19 | 0.0574   | 0.0256   | 0.8239   | 0.4018   | 0.6797 | 0.9841 | 0.0843   | 0.3739 |
| adenylosuccinate                                  | 195      | 1.29  | 1.09 | 0.93 | 0.79 | 0.0872   | 0.0361   | 0.5757   | 0.3179   | 0.6337 | 0.9841 | 0.1026   | 0.4068 |
| adenosine                                         | 60961    | 13.59 | 3.16 | 0.98 | 0.23 | 1.13E-06 | 2.74E-06 | 0.0249   | 0.0253   | 0.9926 | 0.9997 | 0.0007   | 0.0168 |
| adenine                                           | 190      | 1.13  | 0.96 | 1.04 | 0.88 | 0.0641   | 0.0283   | 0.5417   | 0.3089   | 0.3972 | 0.9698 | 0.103    | 0.4068 |
| N1-methyladenosine                                | 27476    | 0.92  | 0.72 | 0.89 | 0.7  | 0.4931   | 0.1271   | 0.0112   | 0.013    | 0.3654 | 0.9698 | 0.0065   | 0.0589 |
| N6-methyladenosine                                | 102175   | 0.92  | 1.17 | 0.92 | 1.17 | 0.4995   | 0.1275   | 0.1266   | 0.0974   | 0.5191 | 0.9698 | 0.1196   | 0.4613 |
| guanosine 5'- monophosphate (5'-GMP)              | 6804     | 0.53  | 0.55 | 0.79 | 0.82 | 0.0072   | 0.005    | 0.001    | 0.0018   | 0.631  | 0.9841 | 0.2178   | 0.6072 |
| guanosine                                         | 6802     | 0.69  | 0.59 | 0.94 | 0.8  | 6.62E-05 | 7.36E-05 | 3.86E-07 | 2.44E-06 | 0.4723 | 0.9698 | 0.0137   | 0.1101 |
| uridine                                           | 6029     | 0.9   | 0.95 | 0.96 | 1.01 | 0.0048   | 0.0036   | 0.1253   | 0.0969   | 0.2035 | 0.9698 | 0.8593   | 0.8756 |
| uracil                                            | 1174     | 0.64  | 0.6  | 1.13 | 1.06 | 2.98E-05 | 3.57E-05 | 7.85E-06 | 3.31E-05 | 0.2147 | 0.9698 | 0.4413   | 0.7719 |
| pseudouridine                                     | 15047    | 0.62  | 0.65 | 0.95 | 1    | 6.12E-09 | 3.20E-08 | 3.50E-08 | 2.97E-07 | 0.4244 | 0.9698 | 0.9142   | 0.8846 |
| 5,6-dihydrouracil                                 | 649      | 0.62  | 0.59 | 1.01 | 0.96 | 0.0005   | 0.0005   | 0.0002   | 0.0005   | 0.7875 | 0.9997 | 0.956    | 0.8846 |
| beta-alanine                                      | 239      | 1.25  | 1.06 | 1.06 | 0.9  | 0.025    | 0.0132   | 0.5137   | 0.2966   | 0.6676 | 0.9841 | 0.2133   | 0.6072 |

|                                                   |         |      |      |      |      |          |          |          |          |        |        |        |        |
|---------------------------------------------------|---------|------|------|------|------|----------|----------|----------|----------|--------|--------|--------|--------|
| cytidine 5'-monophosphate (5'-CMP)                | 6131    | 0.71 | 0.77 | 0.89 | 0.96 | 2.11E-06 | 4.62E-06 | 8.69E-05 | 0.0002   | 0.0531 | 0.9698 | 0.5181 | 0.7996 |
| cytidine                                          | 6175    | 0.7  | 0.68 | 0.95 | 0.92 | 0.0008   | 0.0007   | 0.0004   | 0.0008   | 0.6523 | 0.9841 | 0.471  | 0.782  |
| methylphosphate                                   | 13130   | 1.42 | 1.47 | 0.9  | 0.93 | 0.0001   | 0.0001   | 2.95E-05 | 9.77E-05 | 0.1655 | 0.9698 | 0.3829 | 0.7342 |
| nicotinamide                                      | 936     | 1.07 | 1.05 | 0.99 | 0.96 | 0.0749   | 0.032    | 0.2361   | 0.1638   | 0.731  | 0.9841 | 0.3325 | 0.7055 |
| nicotinamide adenine dinucleotide (NAD+)          | 5893    | 1.51 | 1.33 | 0.91 | 0.8  | 0.1088   | 0.0432   | 0.3696   | 0.2355   | 0.7044 | 0.9841 | 0.2688 | 0.6536 |
| riboflavin (Vitamin B2)                           | 493570  | 1.12 | 1.13 | 1.12 | 1.13 | 0.2596   | 0.0815   | 0.2551   | 0.1715   | 0.2176 | 0.9698 | 0.2136 | 0.6072 |
| flavin adenine dinucleotide (FAD)                 | 643975  | 1.33 | 1.35 | 0.96 | 0.98 | 0.0006   | 0.0006   | 0.0003   | 0.0006   | 0.5286 | 0.9698 | 0.7357 | 0.849  |
| flavin mononucleotide (FMN)                       | 710     | 0.82 | 0.67 | 1.11 | 0.91 | 0.0988   | 0.0407   | 0.001    | 0.0018   | 0.3267 | 0.9698 | 0.3332 | 0.7055 |
| pantothenate                                      | 6613    | 0.76 | 0.86 | 1    | 1.11 | 2.95E-05 | 3.57E-05 | 0.0055   | 0.0073   | 0.989  | 0.9997 | 0.0574 | 0.2896 |
| phosphopantetheine                                | 987     | 1.01 | 0.96 | 1.02 | 0.97 | 0.8433   | 0.1889   | 0.6974   | 0.3621   | 0.809  | 0.9997 | 0.7302 | 0.849  |
| 3'-dephosphocoenzyme A                            | 444485  | 1.14 | 1.09 | 0.98 | 0.93 | 0.1594   | 0.0569   | 0.4804   | 0.285    | 0.8412 | 0.9997 | 0.6015 | 0.8195 |
| coenzyme A                                        | 317     | 1.42 | 0.98 | 1.05 | 0.72 | 0.0033   | 0.0025   | 0.8928   | 0.4128   | 0.6249 | 0.9841 | 0.0081 | 0.0689 |
| glucarate (saccharate)                            | 33037   | 0.74 | 0.58 | 1.01 | 0.79 | 0.0142   | 0.0089   | 1.06E-05 | 4.20E-05 | 0.7988 | 0.9997 | 0.0193 | 0.1396 |
| ascorbate (Vitamin C)                             |         | 0.74 | 0.92 | 0.91 | 1.13 | 0.0078   | 0.0053   | 0.4319   | 0.2647   | 0.3615 | 0.9698 | 0.2626 | 0.6536 |
| dehydroascorbate                                  | 835     | 1.06 | 0.8  | 1.1  | 0.83 | 0.6235   | 0.1496   | 0.1678   | 0.1226   | 0.316  | 0.9698 | 0.3803 | 0.7342 |
| oxalate (ethanedioate)                            | 971     | 0.86 | 0.89 | 0.97 | 1.01 | 0.2816   | 0.0857   | 0.6017   | 0.3271   | 0.6123 | 0.9841 | 0.9547 | 0.8846 |
| alpha-tocopherol                                  | 14985   | 0.95 | 2.97 | 0.76 | 2.36 | 0.8346   | 0.188    | 0.0059   | 0.0077   | 0.7173 | 0.9841 | 0.0229 | 0.1535 |
| pyridoxal                                         | 1050    | 1.07 | 0.88 | 1.03 | 0.85 | 0.3924   | 0.1074   | 0.3139   | 0.207    | 0.6607 | 0.9841 | 0.158  | 0.54   |
| 1,6-anhydroglucose                                | 2724705 | 0.72 | 0.94 | 0.73 | 0.95 | 0.1421   | 0.0529   | 0.724    | 0.3664   | 0.1272 | 0.9698 | 0.6794 | 0.8451 |
| ergothioneine                                     | 3032311 | 1.18 | 1.11 | 1.14 | 1.07 | 0.3595   | 0.1013   | 0.5874   | 0.3218   | 0.4932 | 0.9698 | 0.7575 | 0.8511 |
| erythritol                                        | 222285  | 1.12 | 1.25 | 0.85 | 0.94 | 0.3727   | 0.1037   | 0.1041   | 0.0837   | 0.1463 | 0.9698 | 0.4775 | 0.782  |
| phosphoglycolate                                  | 529     | 0.71 | 1    | 0.77 | 1.09 | 0.2248   | 0.0727   | 0.7154   | 0.3664   | 0.318  | 0.9698 | 0.5581 | 0.8195 |
| stachydrine                                       | 115244  | 3.05 | 2.75 | 0.95 | 0.86 | 1.52E-09 | 1.14E-08 | 2.59E-08 | 2.41E-07 | 0.8747 | 0.9997 | 0.1968 | 0.5815 |
| 2-pyrrolidinone                                   | 12025   | 1.26 | 1.35 | 0.96 | 1.03 | 0.0376   | 0.0179   | 0.0129   | 0.0149   | 0.7009 | 0.9841 | 0.9334 | 0.8846 |
| 2-ethylhexanoate (isobar with 2-propylpentanoate) | 4072356 | 0.9  | 0.86 | 1.03 | 0.99 | 0.2486   | 0.0789   | 0.1081   | 0.0865   | 0.6855 | 0.9841 | 0.9429 | 0.8846 |
| glycerol 2-phosphate                              | 2526    | 1.29 | 1    | 1    | 0.77 | 0.017    | 0.0097   | 0.9497   | 0.4293   | 0.882  | 0.9997 | 0.0207 | 0.1424 |
| trizma acetate                                    | 6503    | 0.28 | 0.77 | 2.5  | 6.89 | 0.5787   | 0.1413   | 0.506    | 0.2934   | 0.4498 | 0.9698 | 0.5181 | 0.7996 |

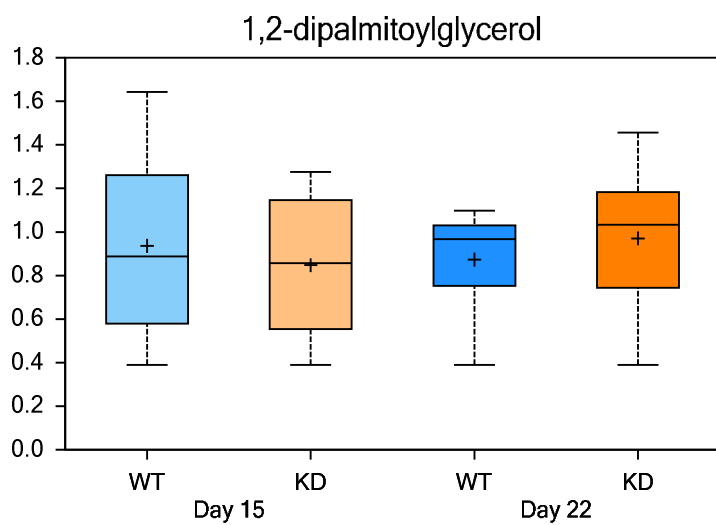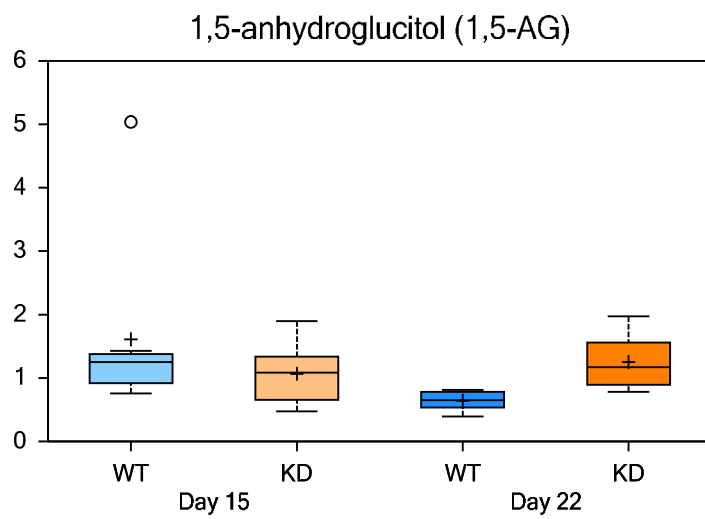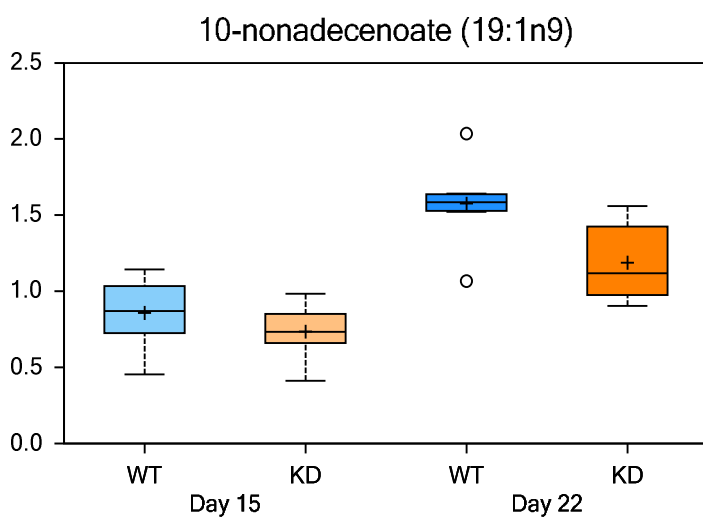

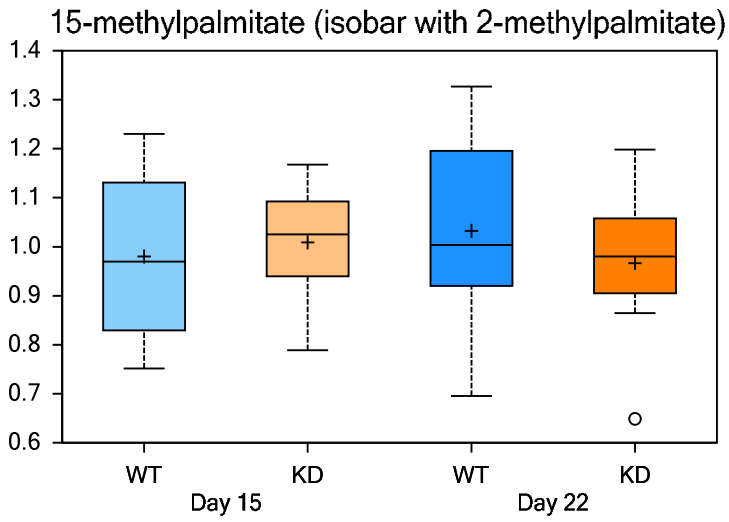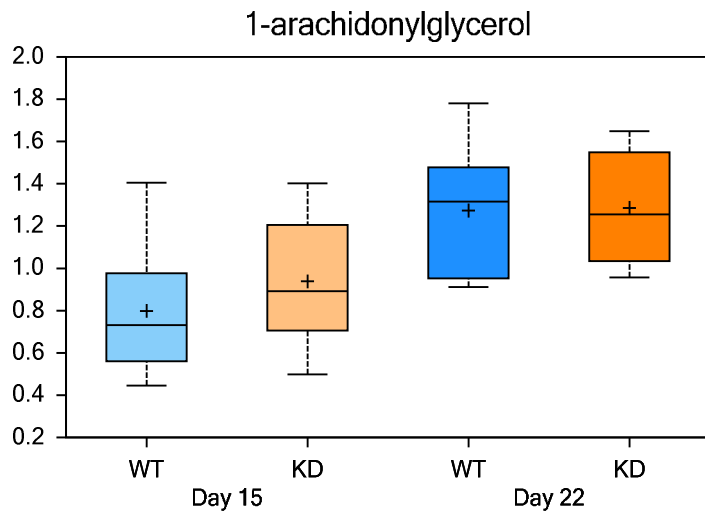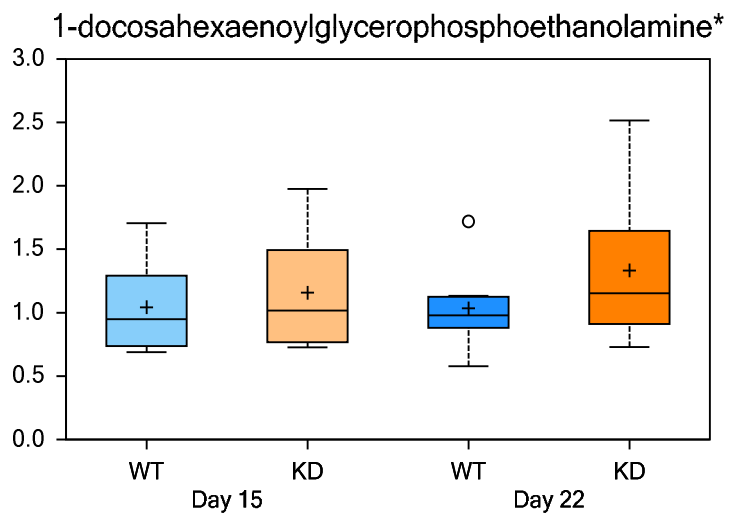



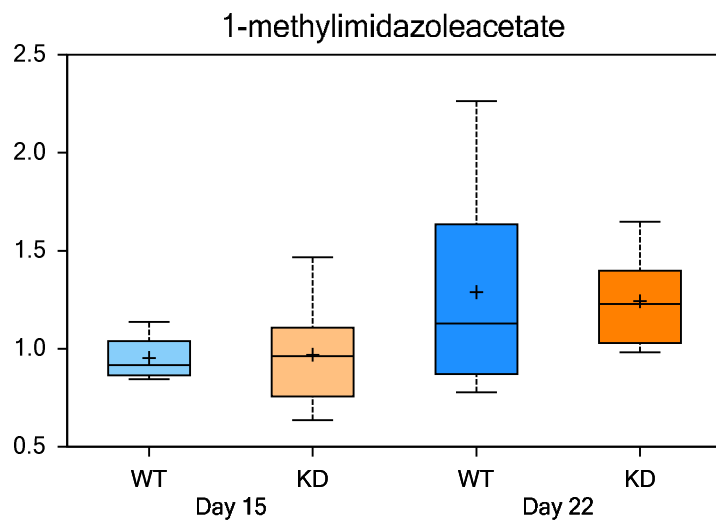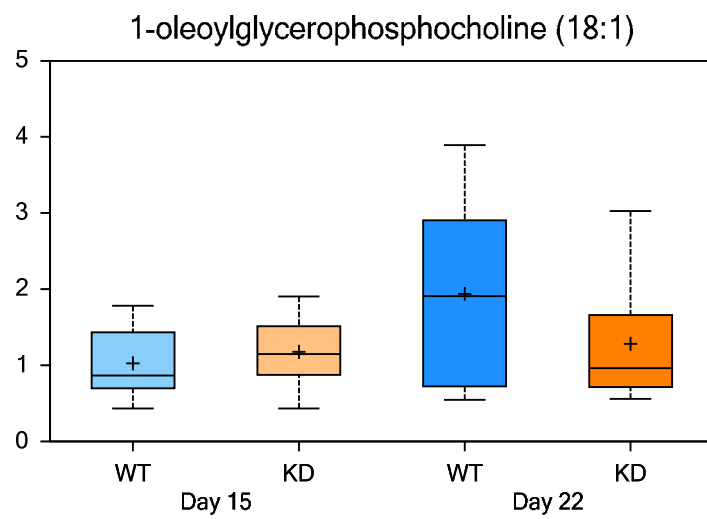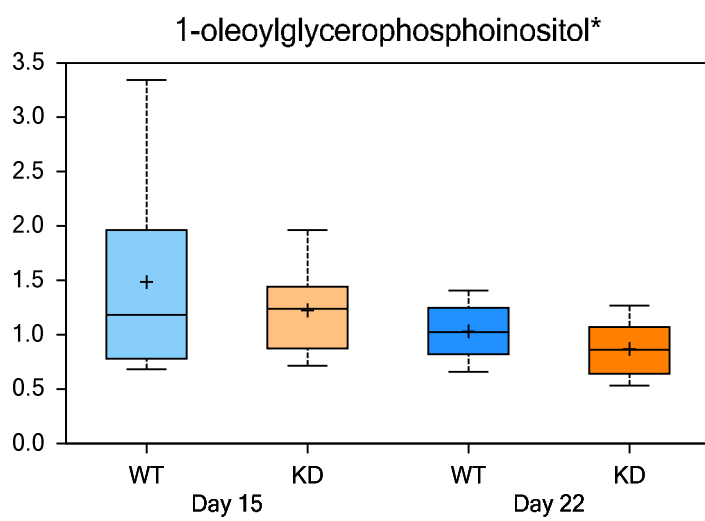

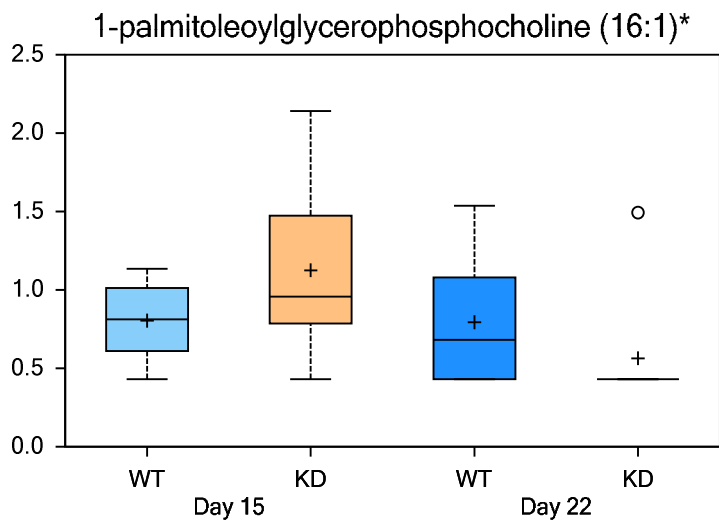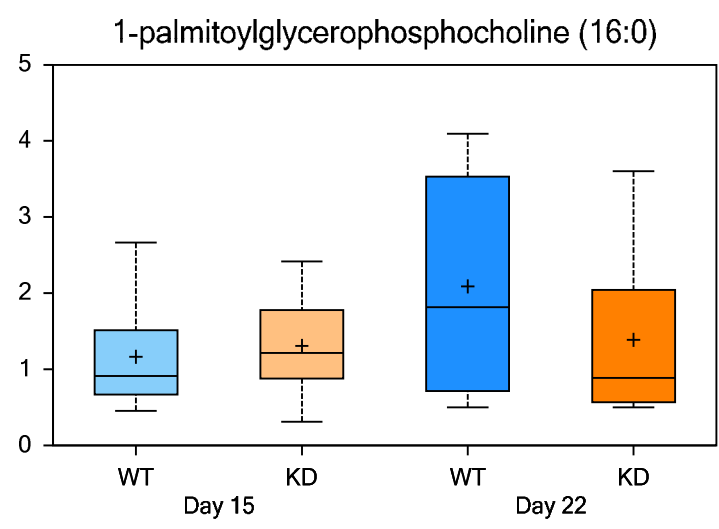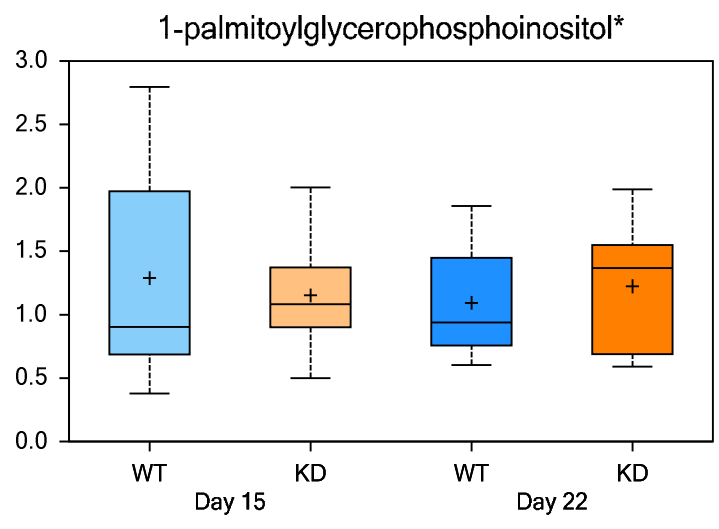

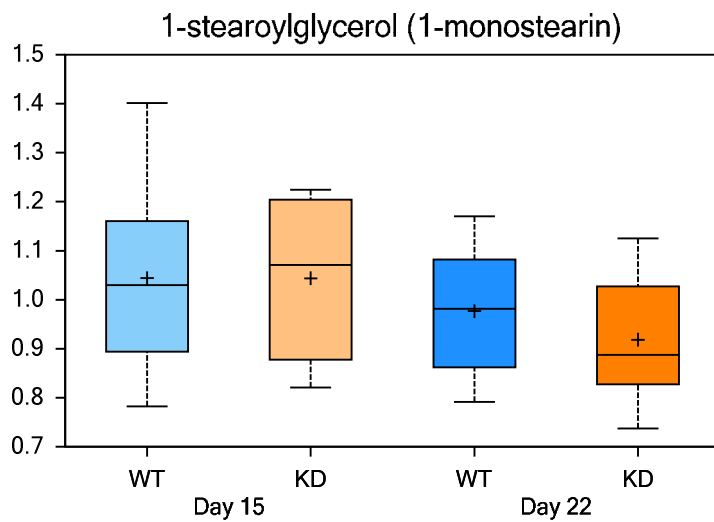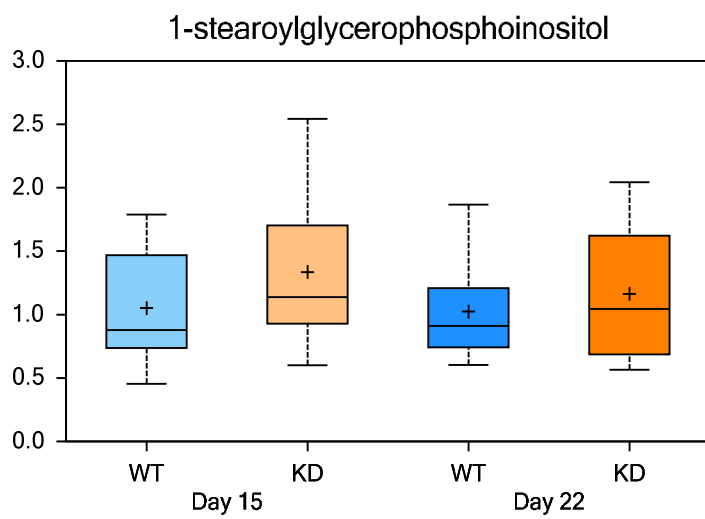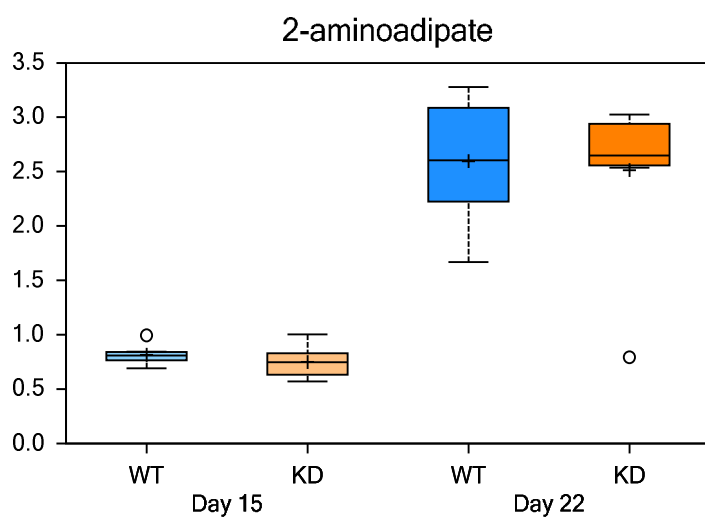

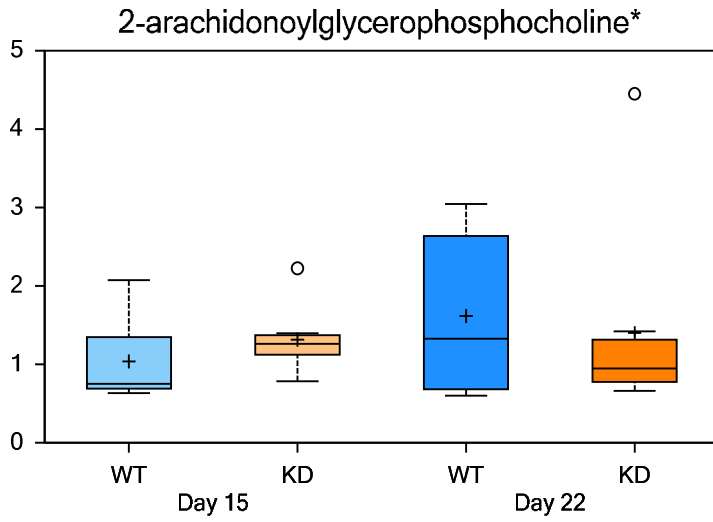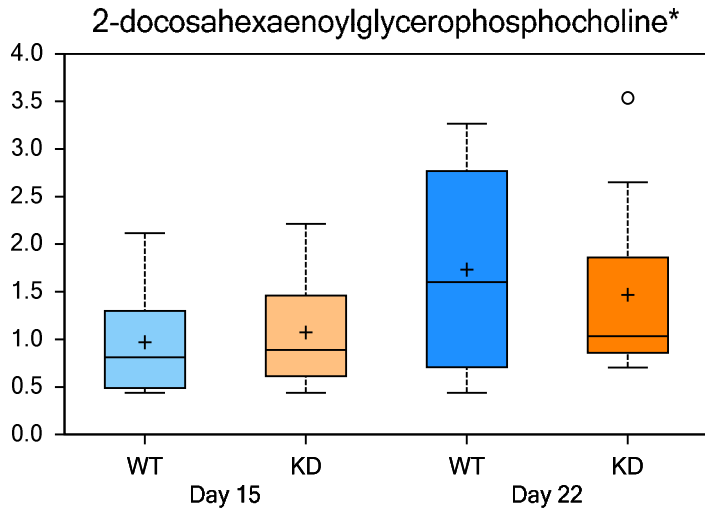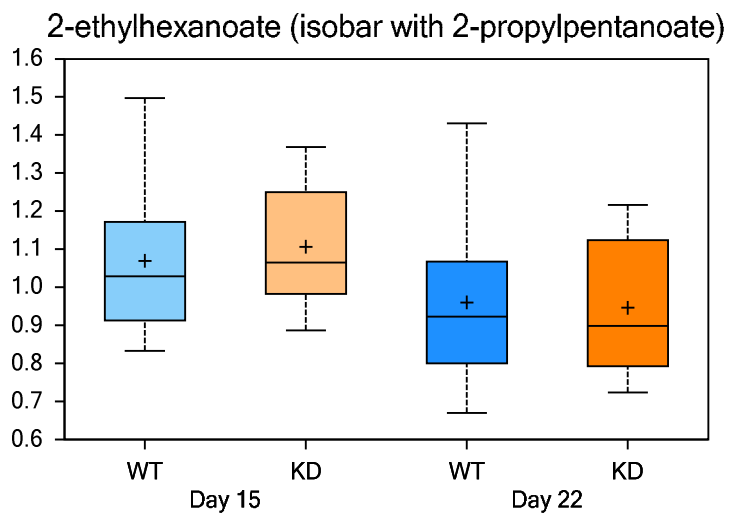

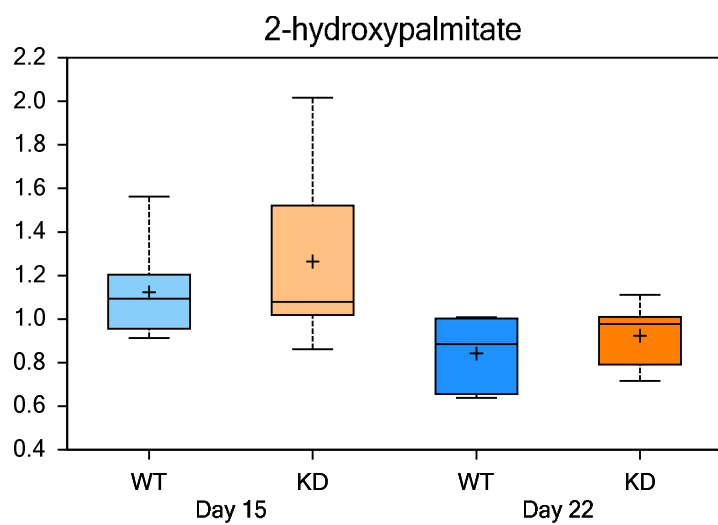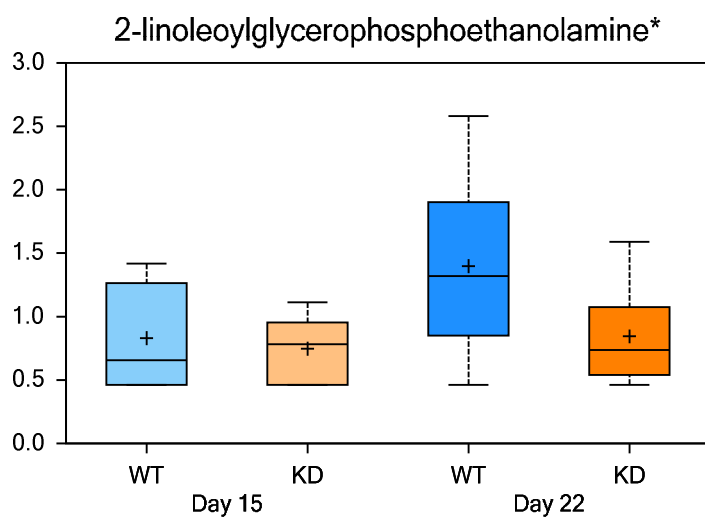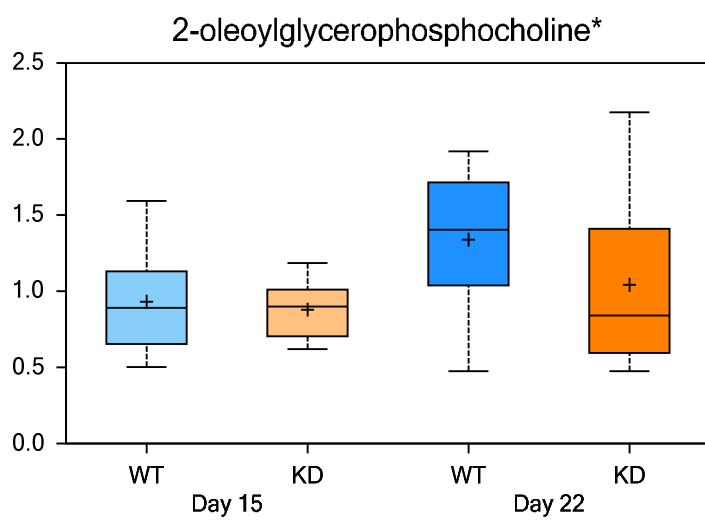

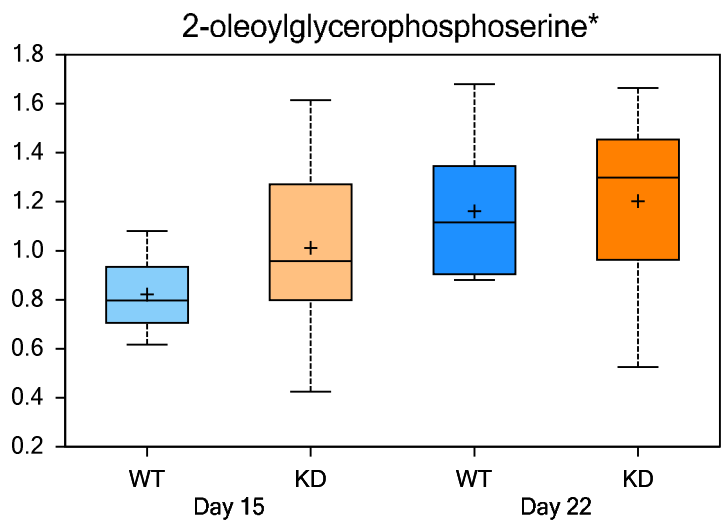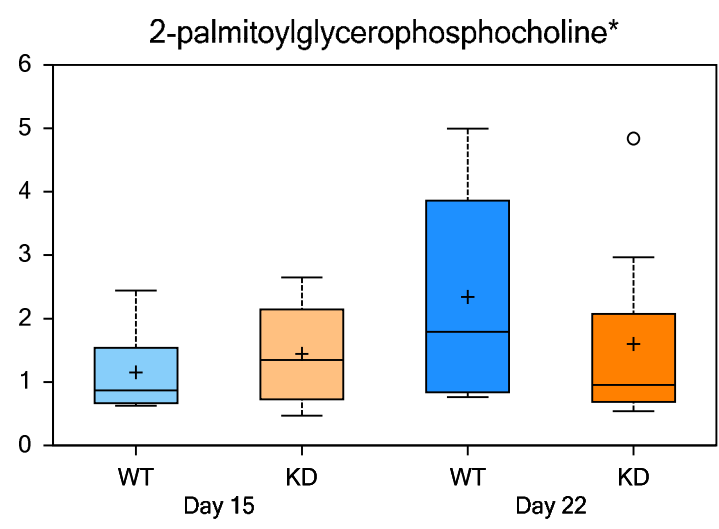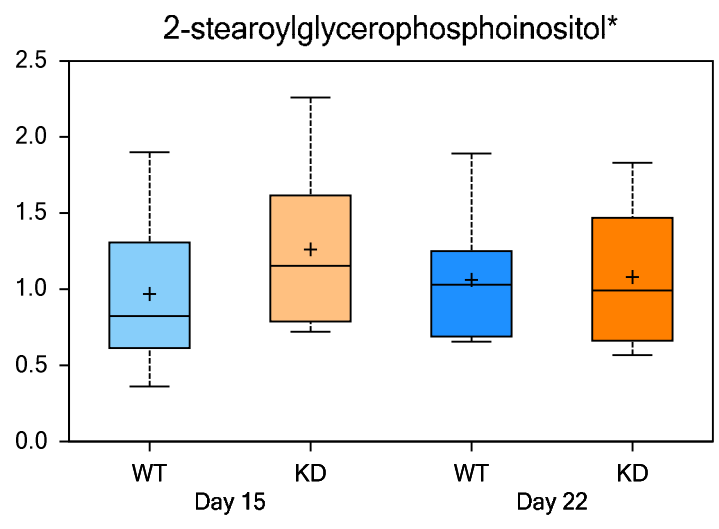

## 3'-dephosphocoenzyme A

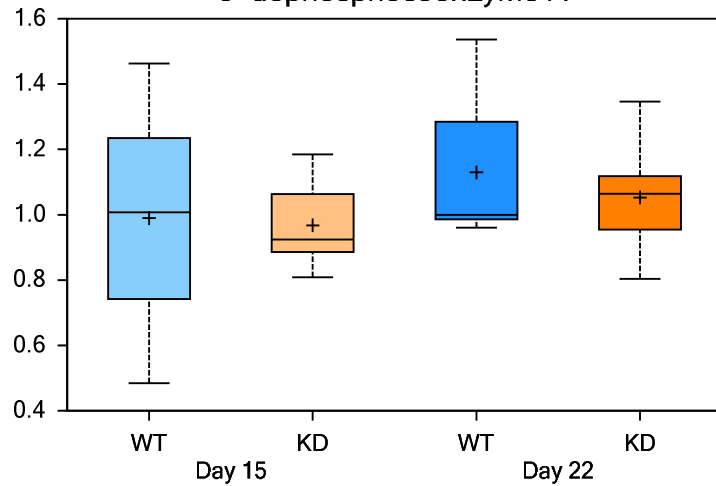

## 3-phosphoglycerate

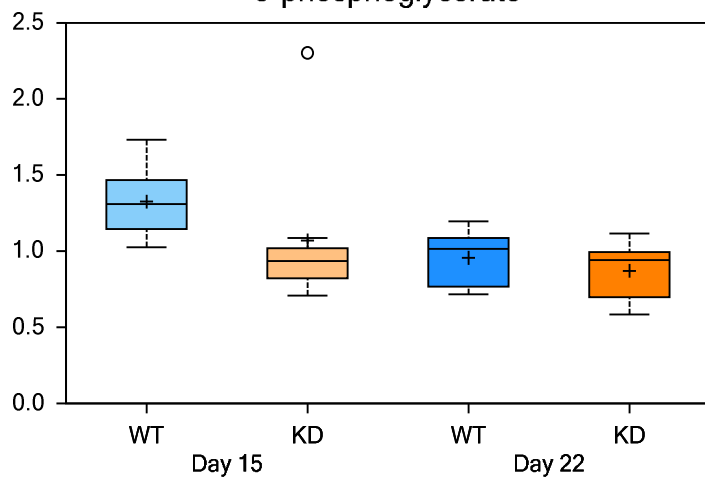

## 5,6-dihydrouracil

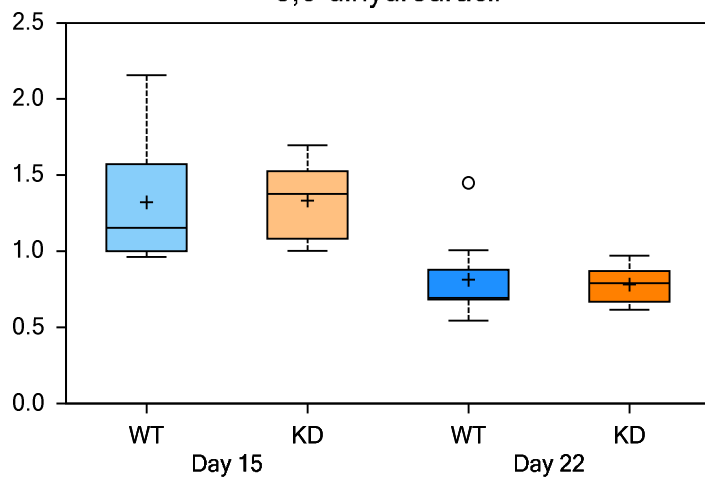

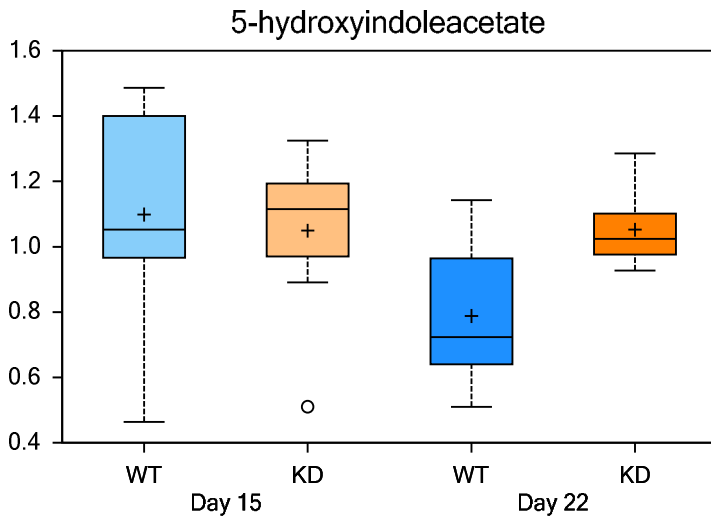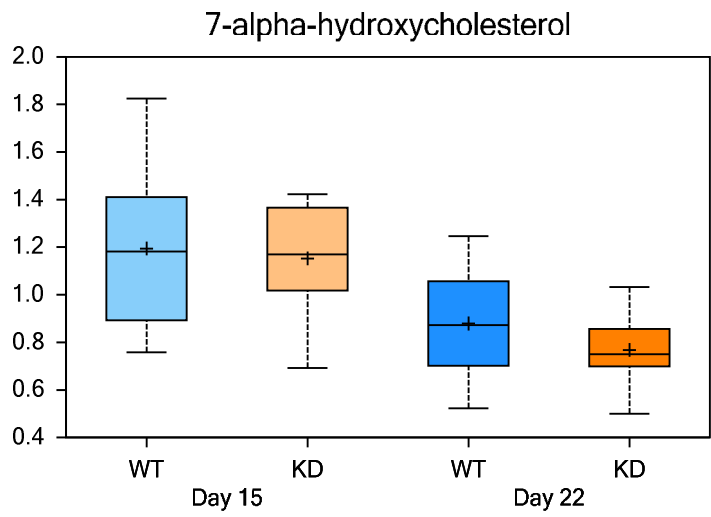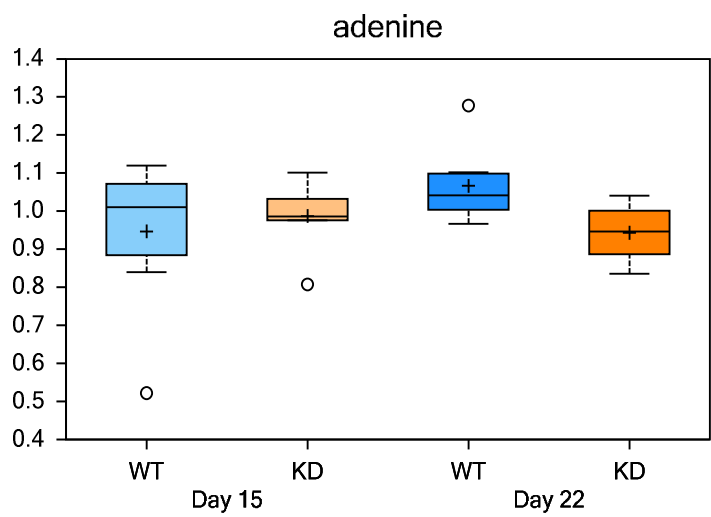



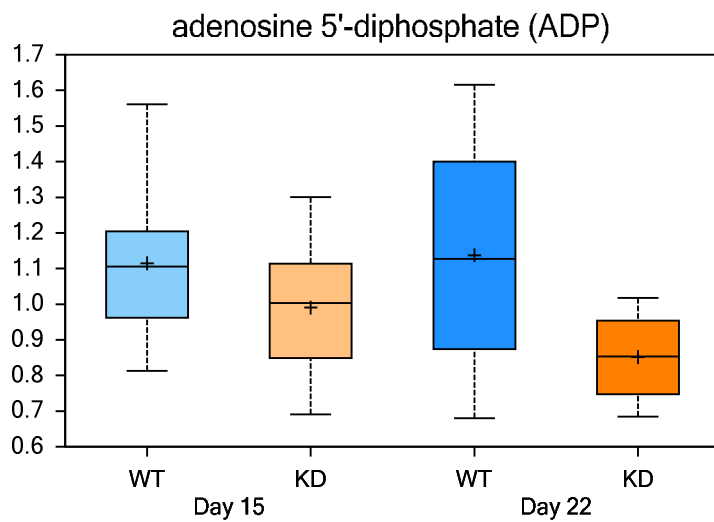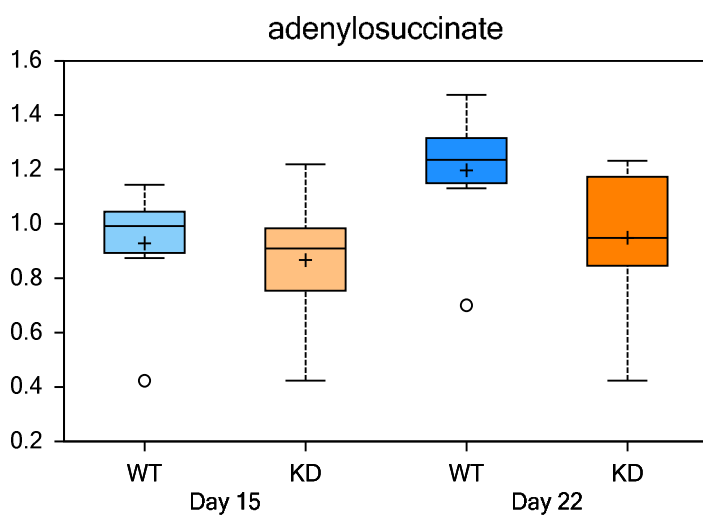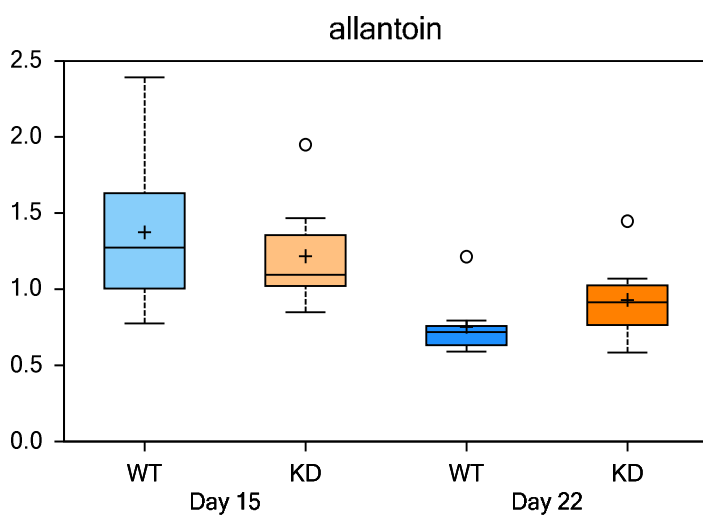

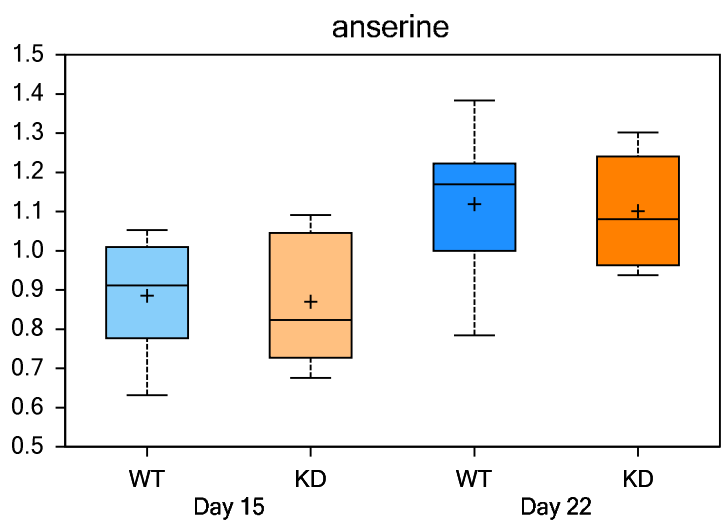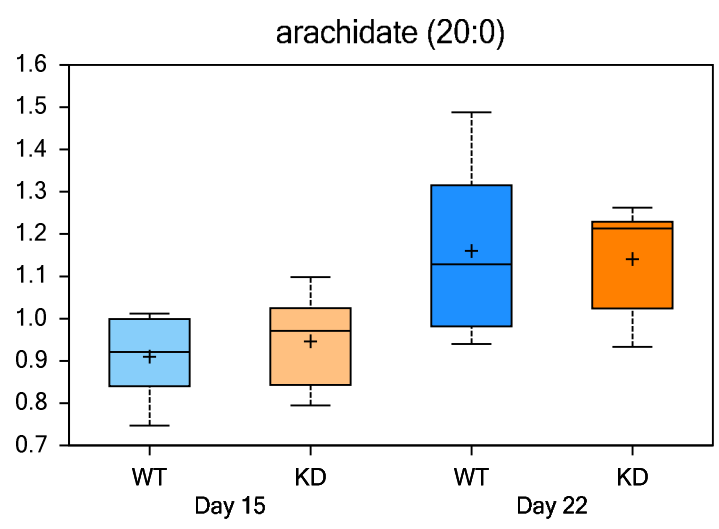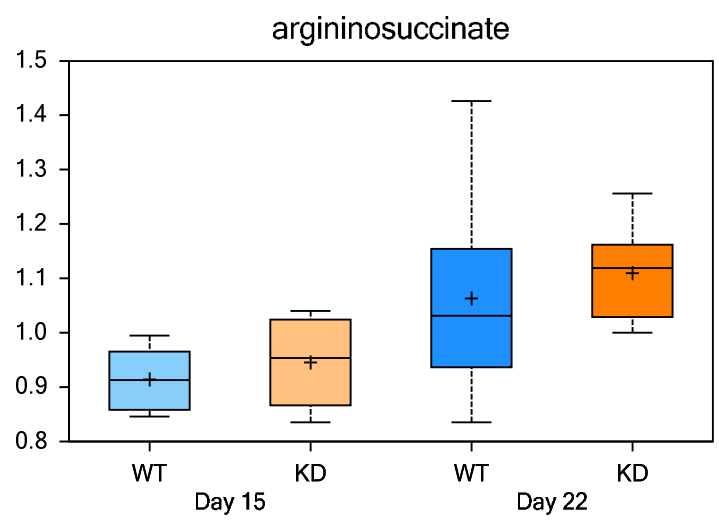

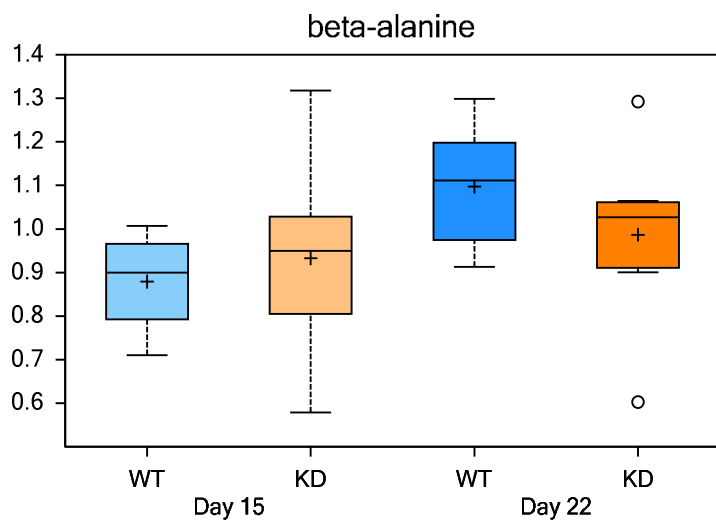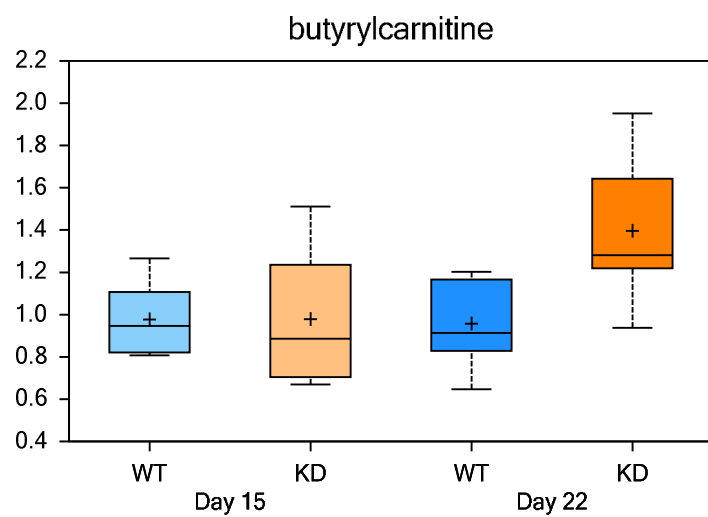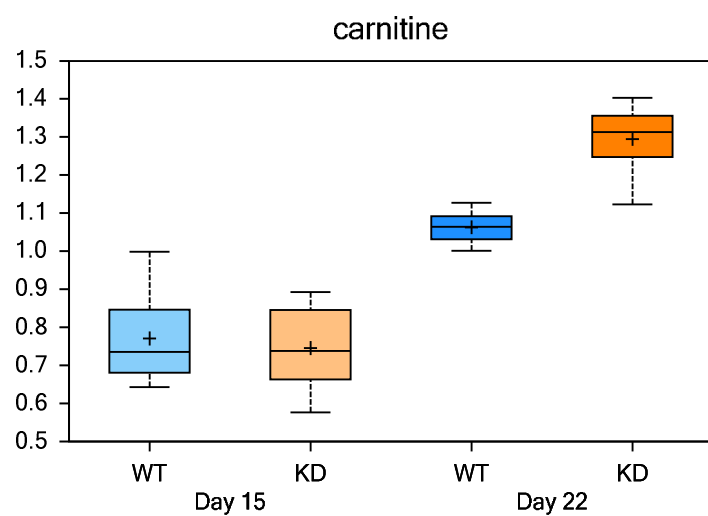

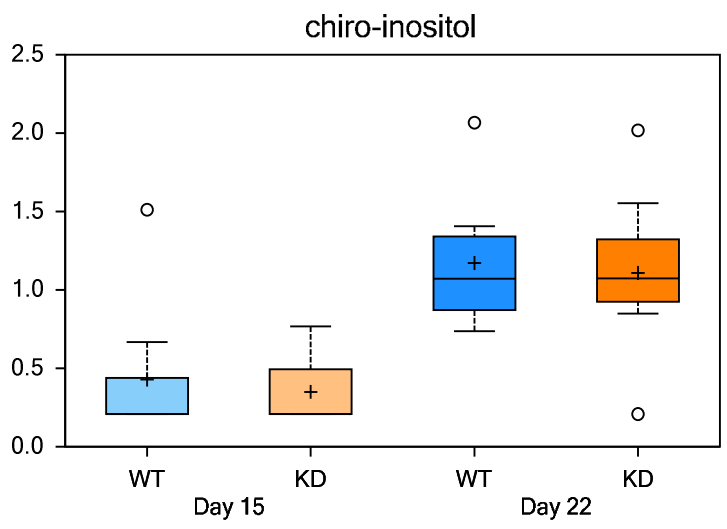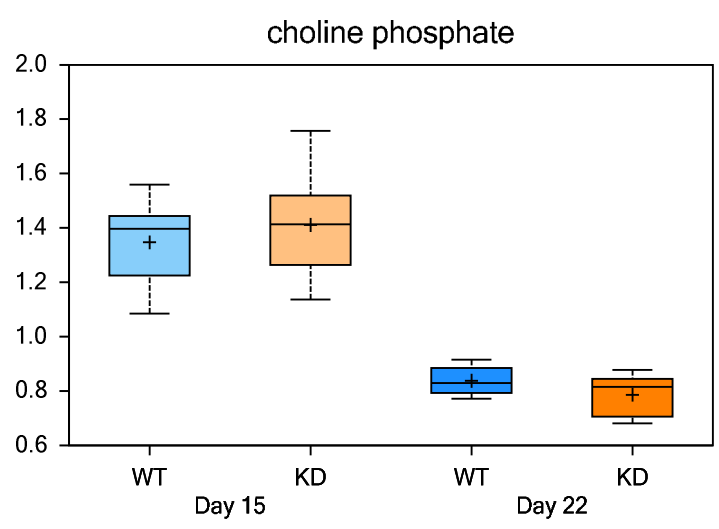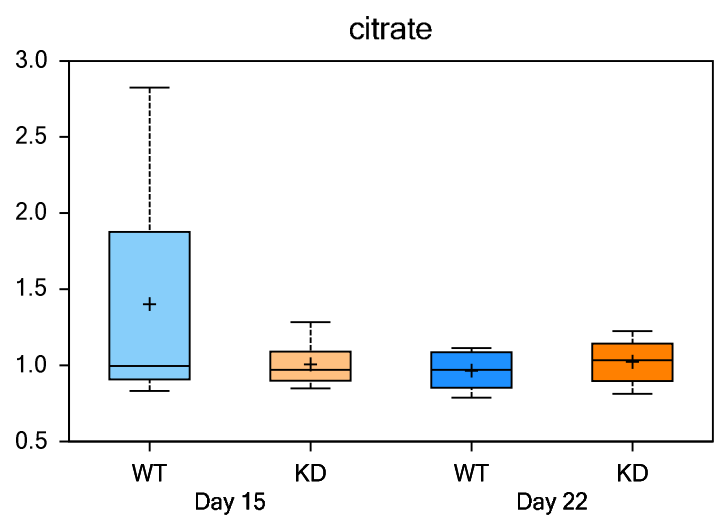

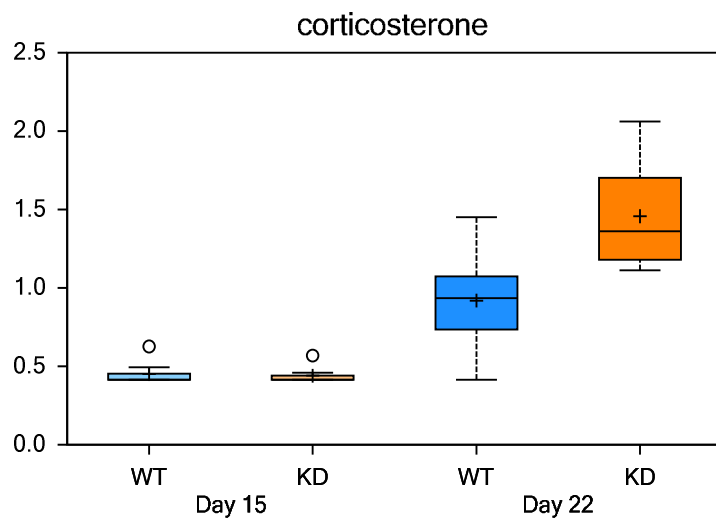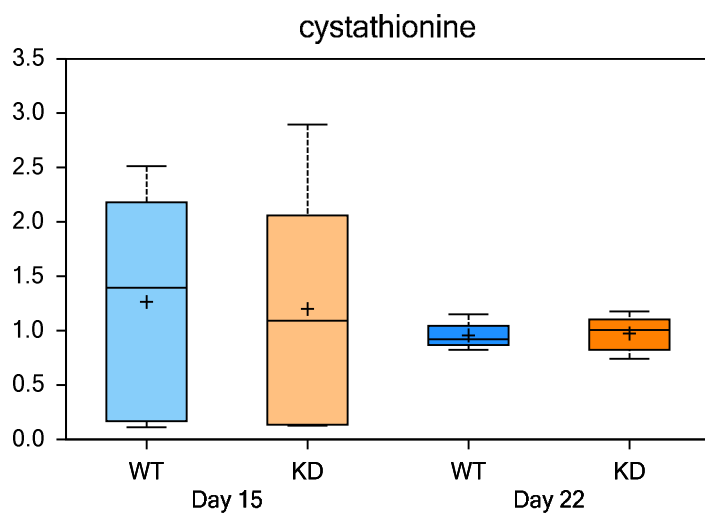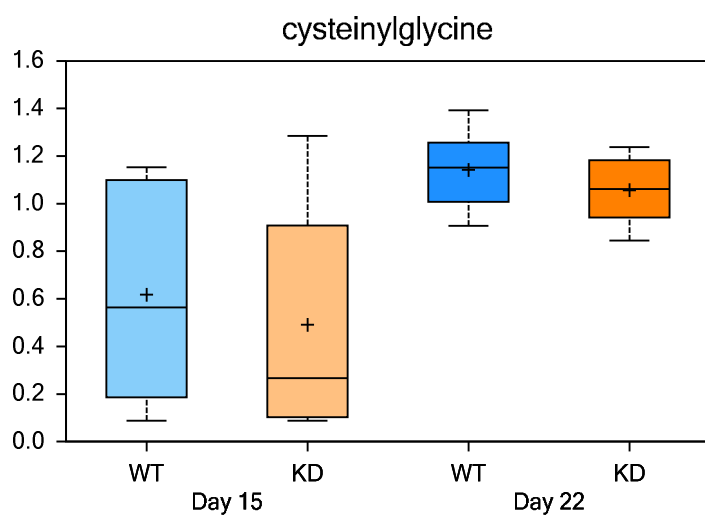

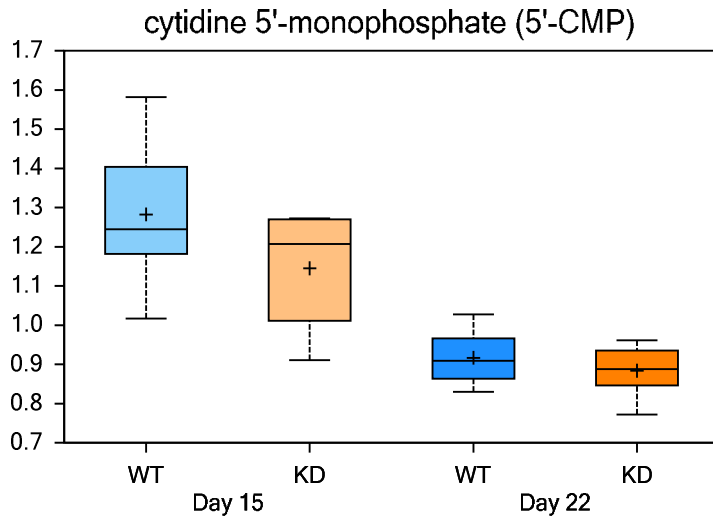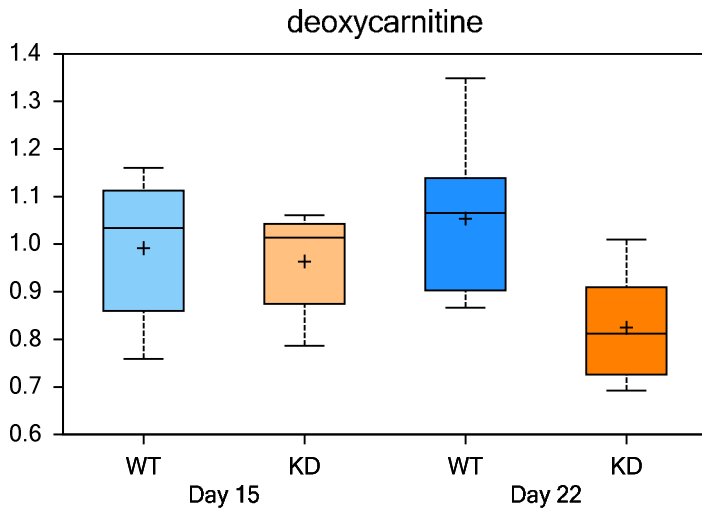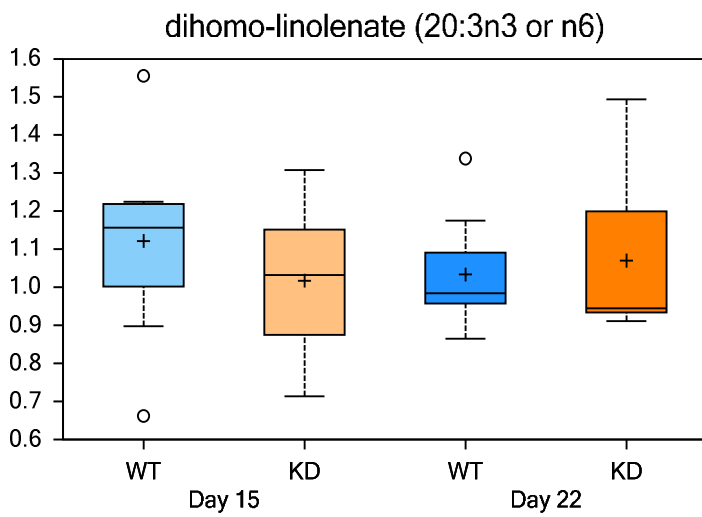

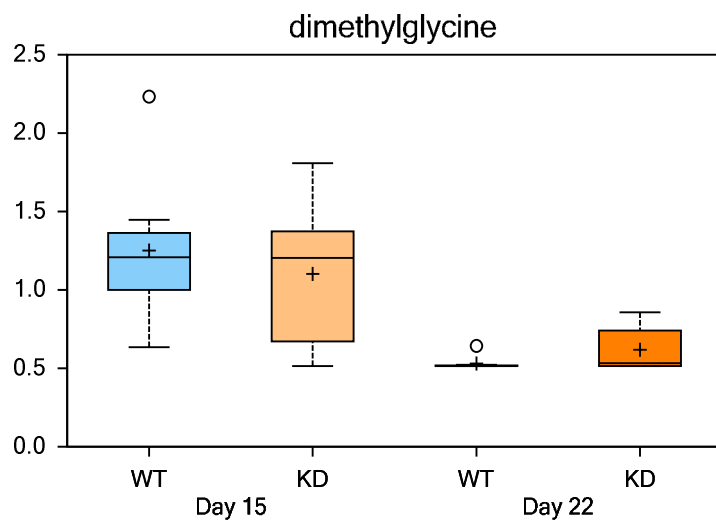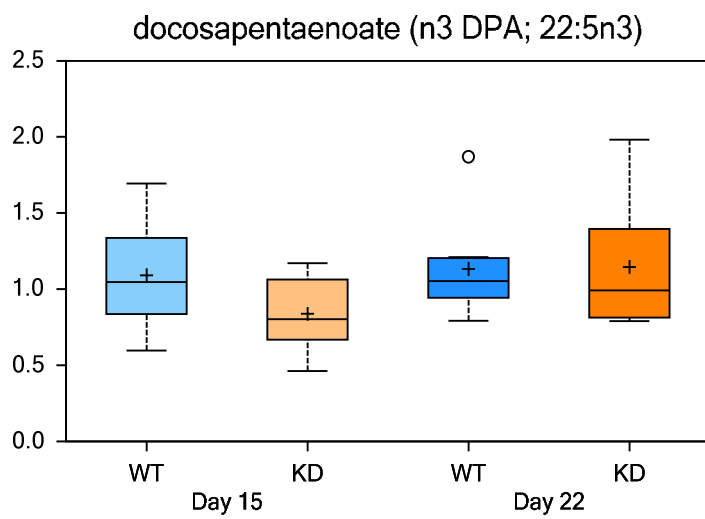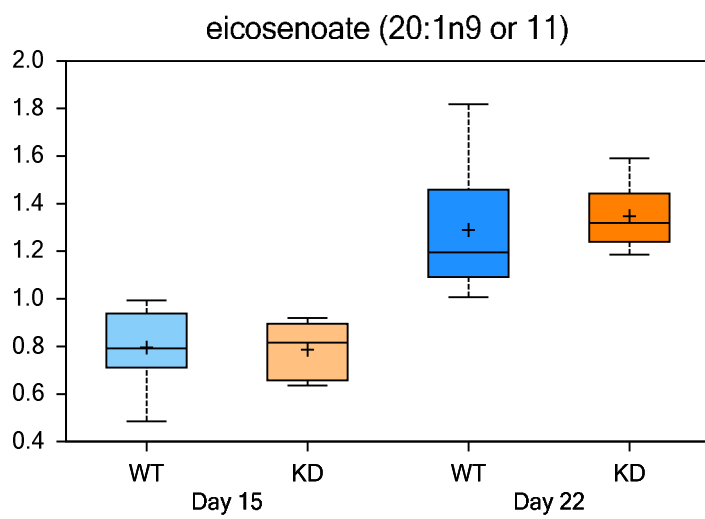

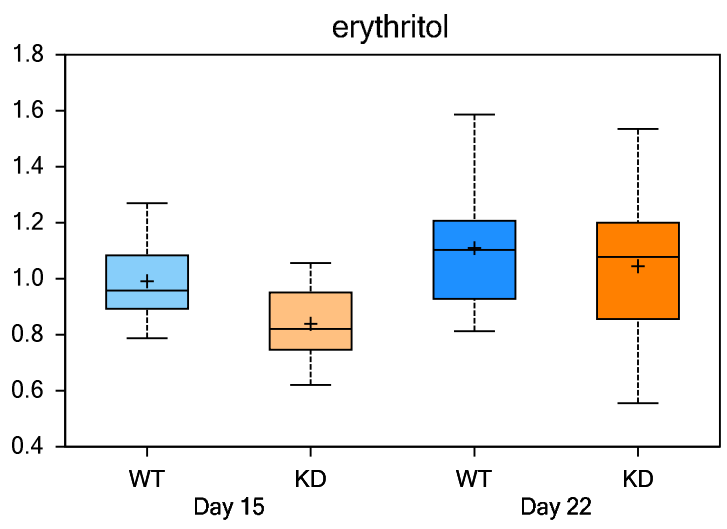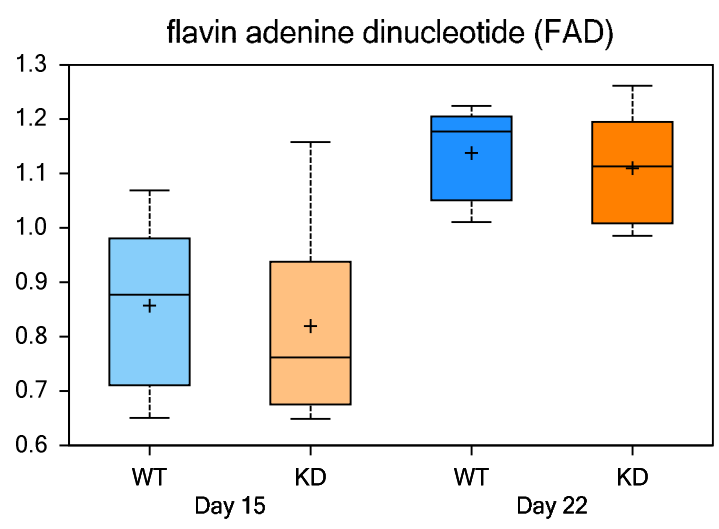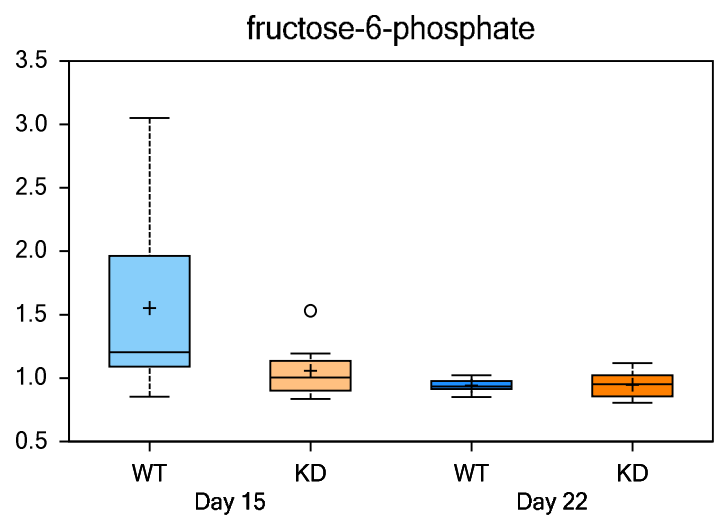



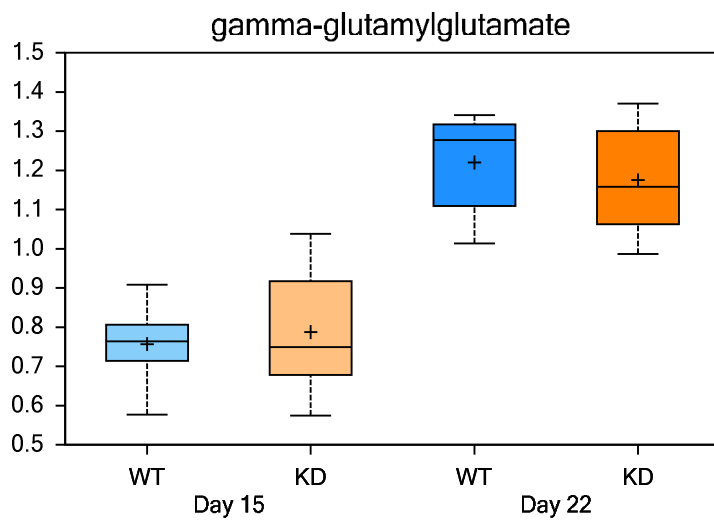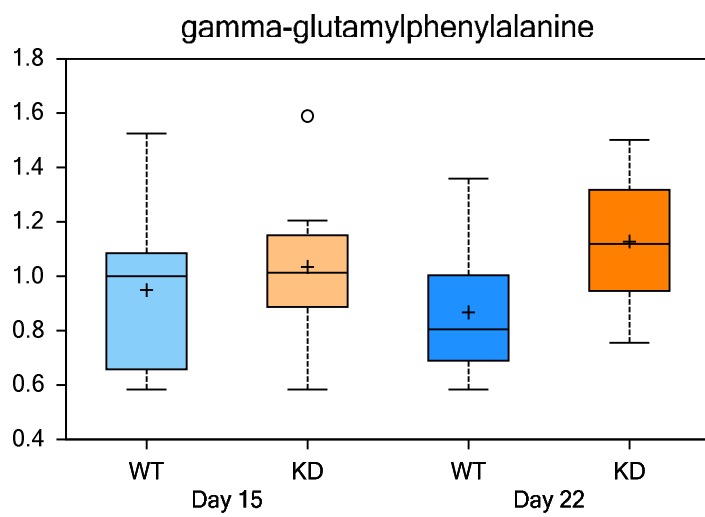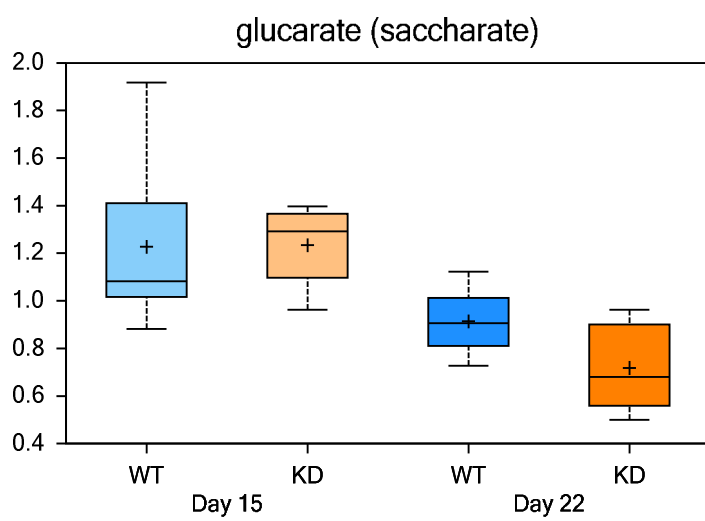

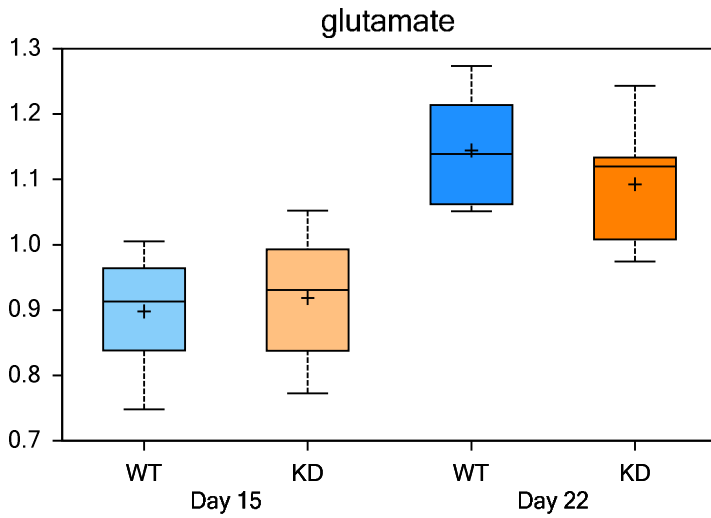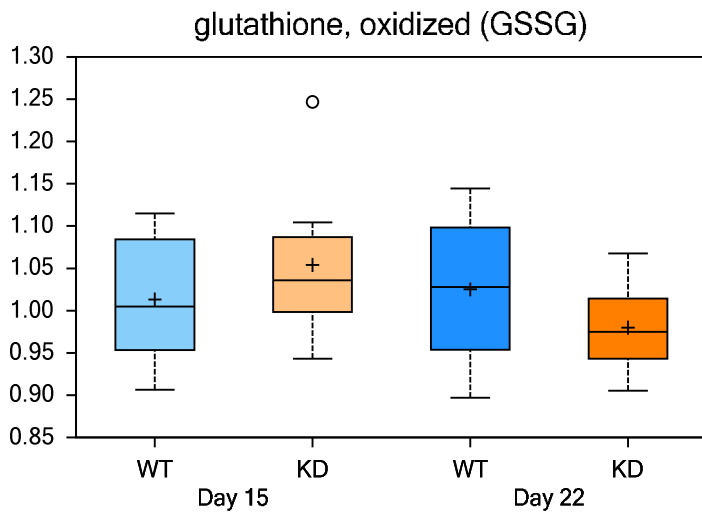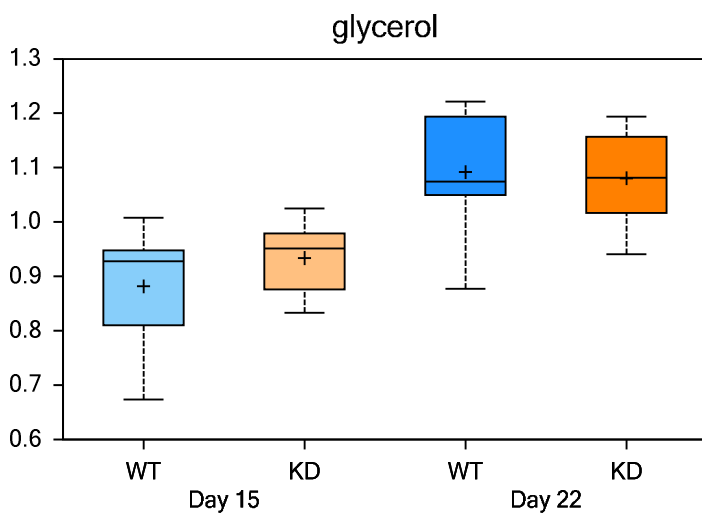

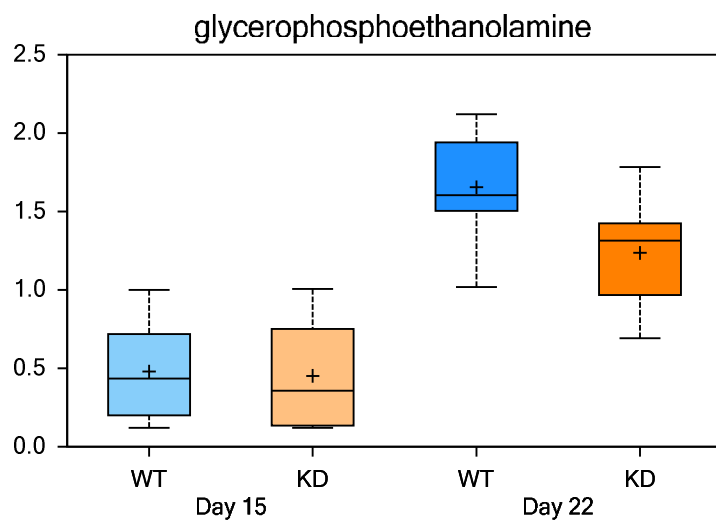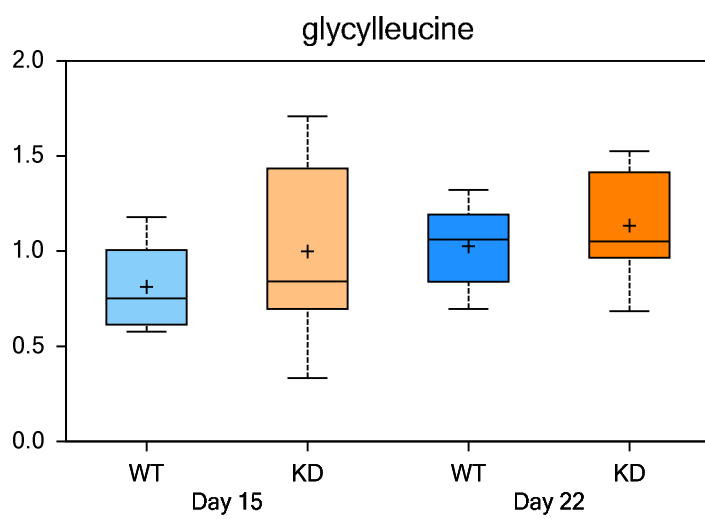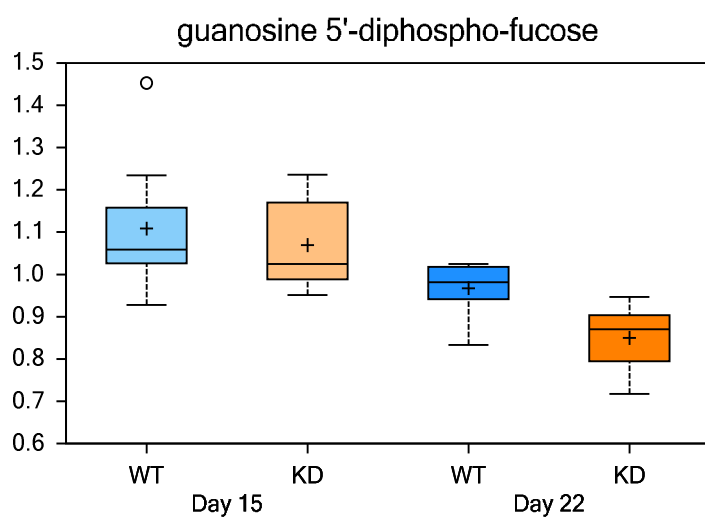

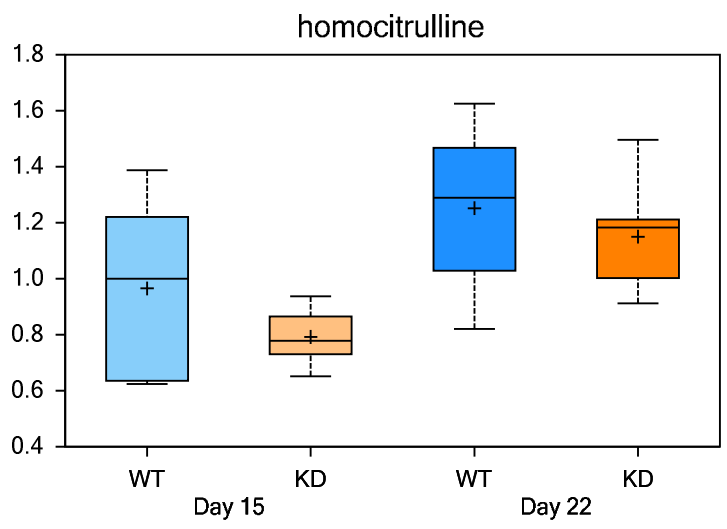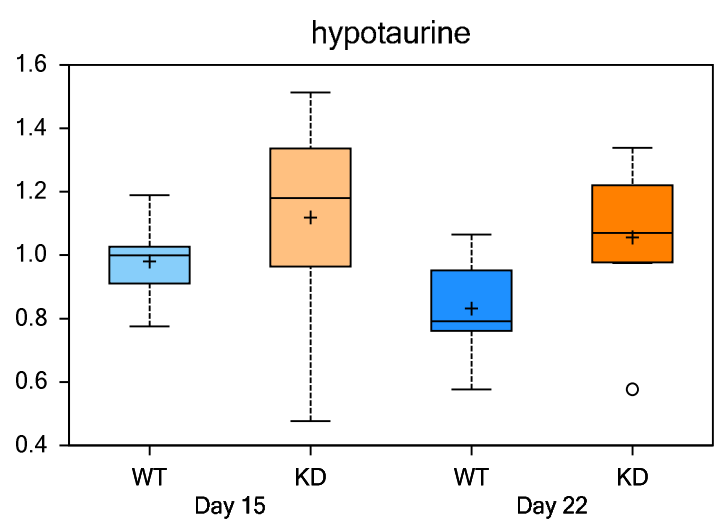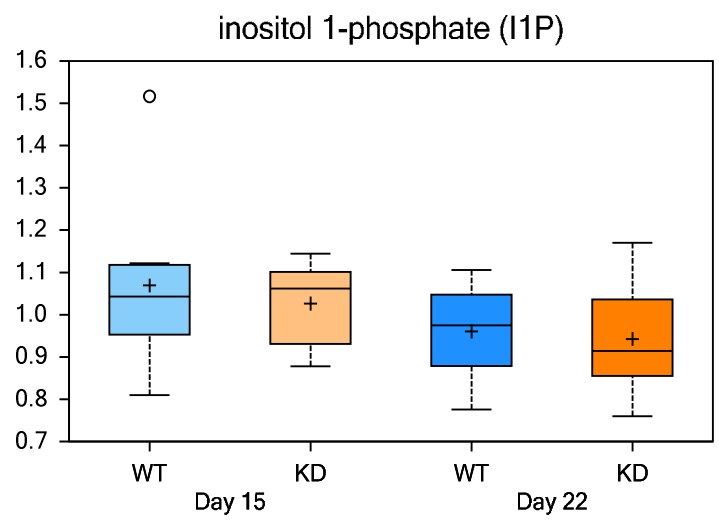

,6-diphosphate, glucose 1,6-diphosphate, myo-inositol 1

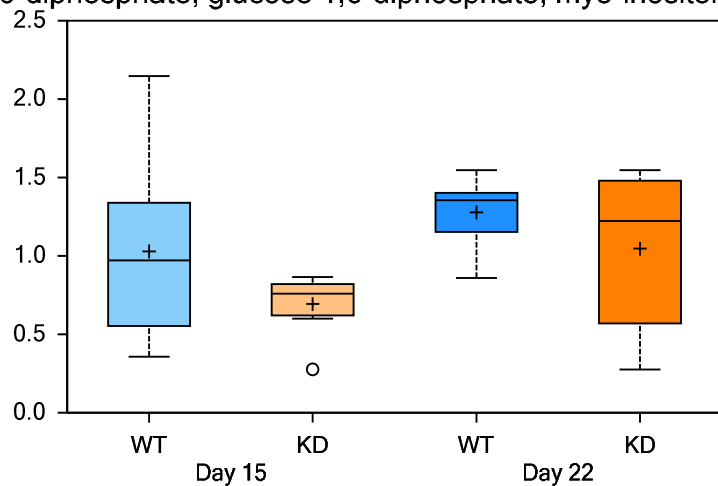

isovalerylcarnitine

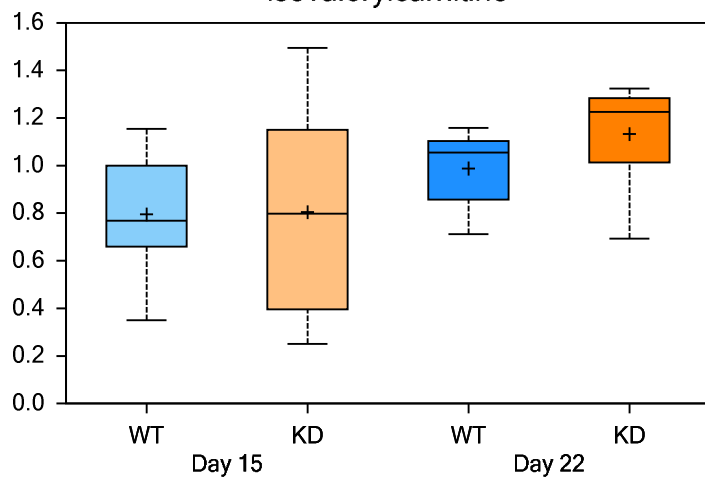

lathosterol

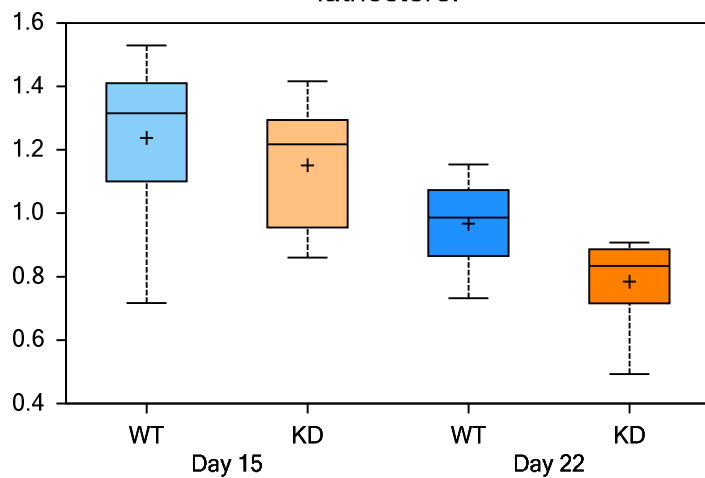

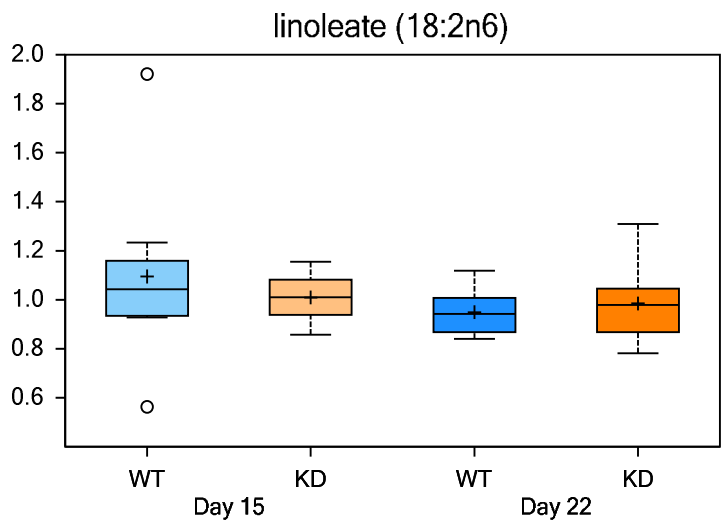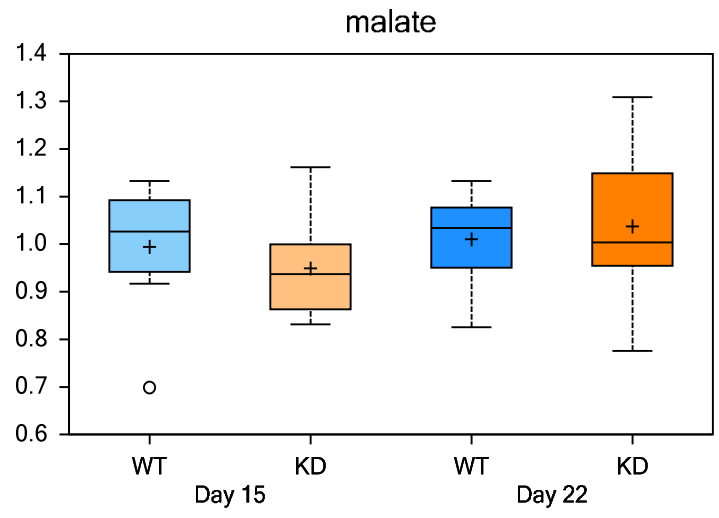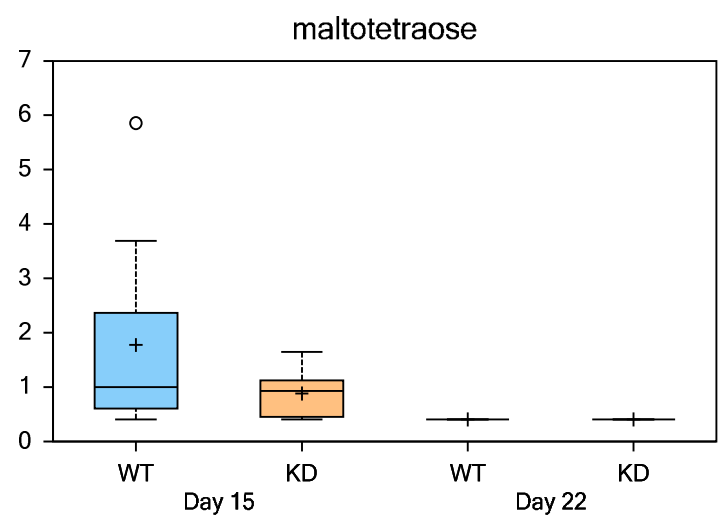

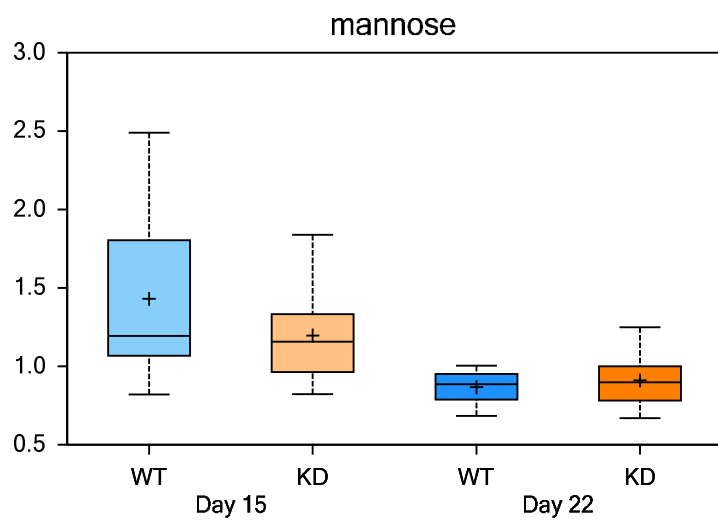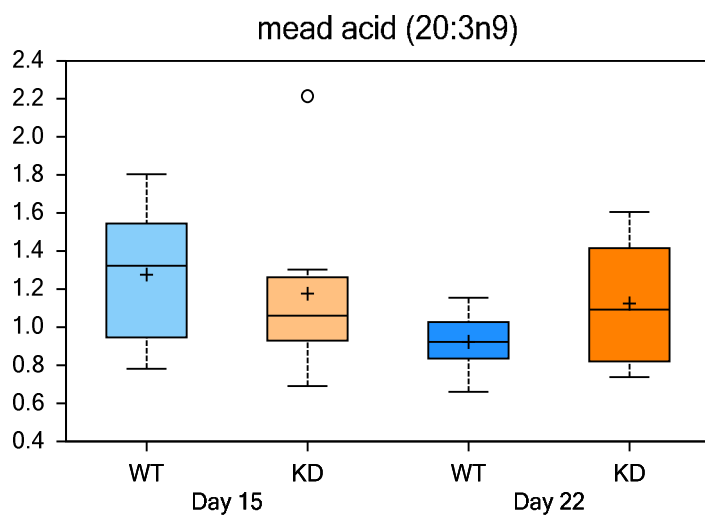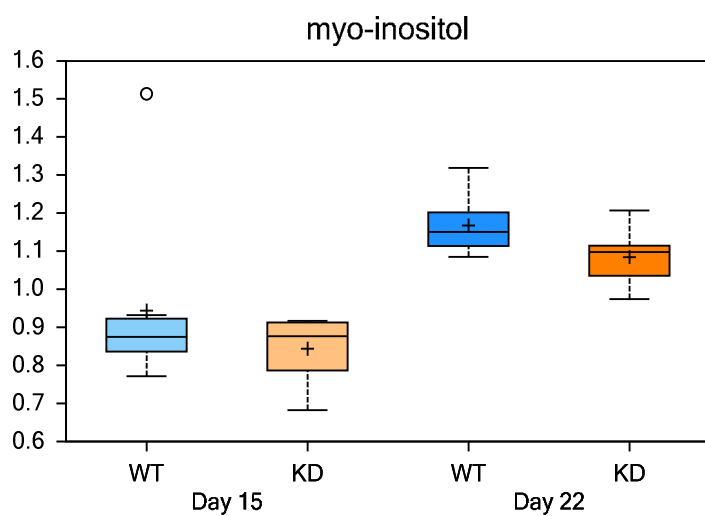

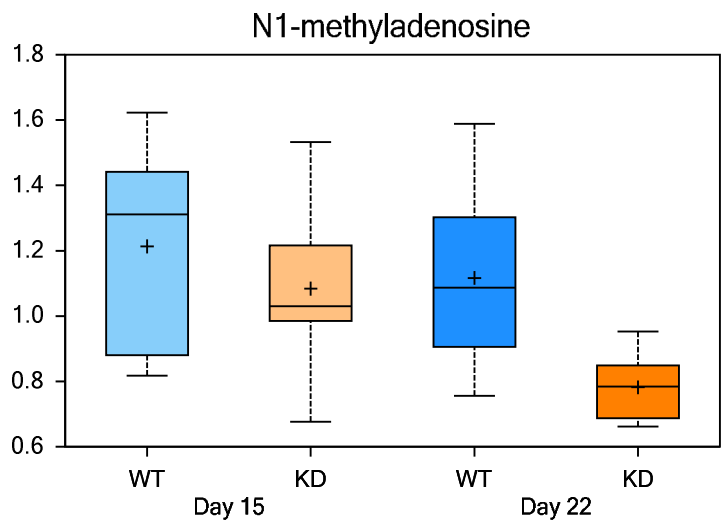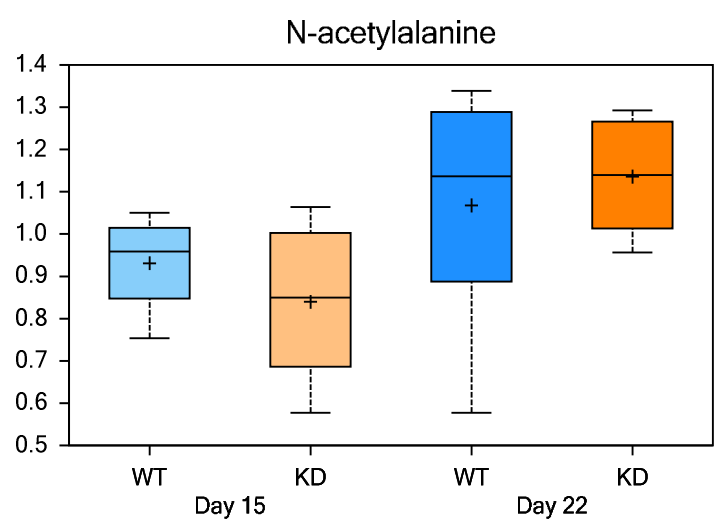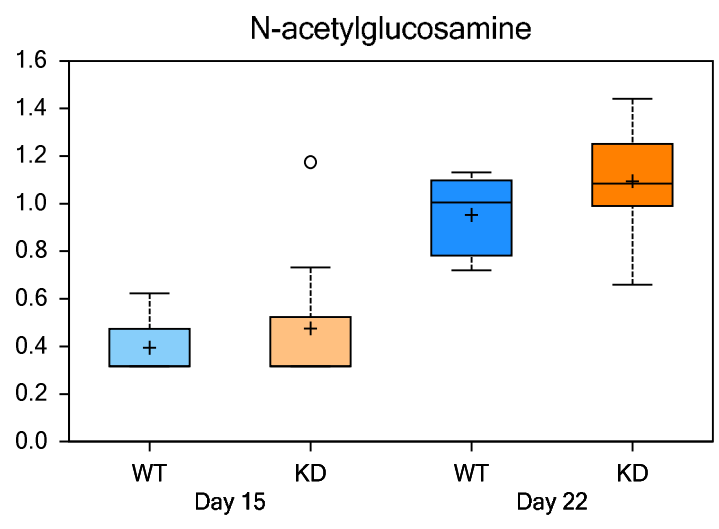



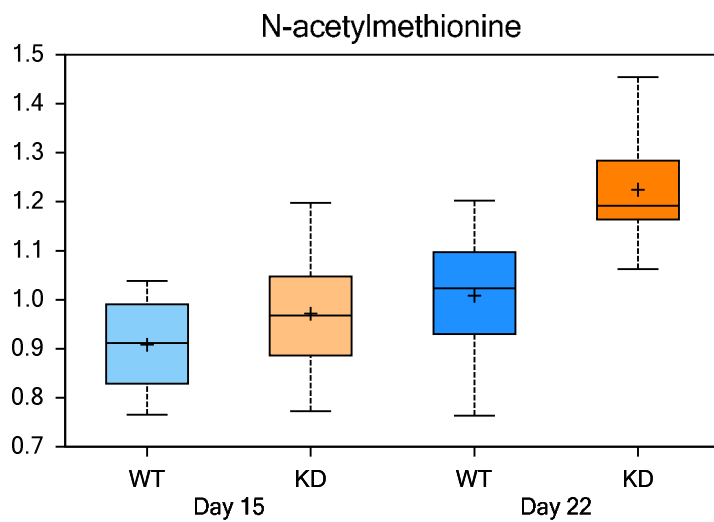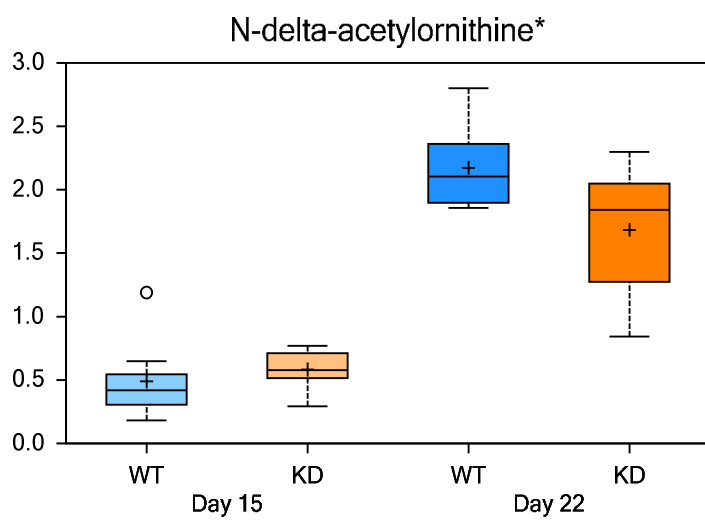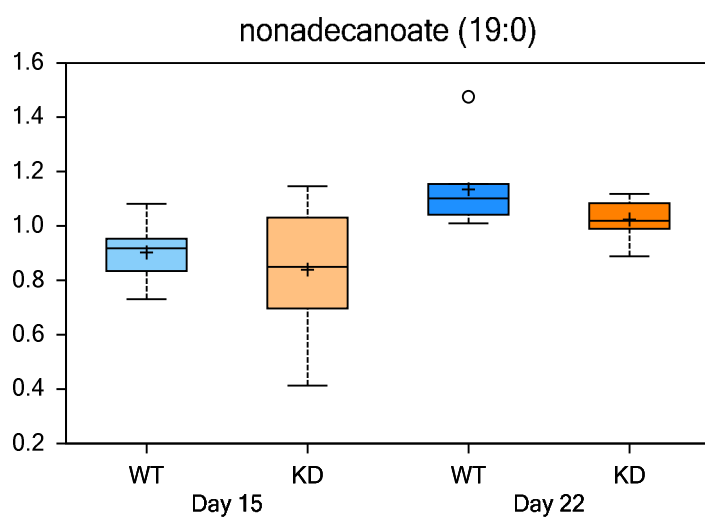

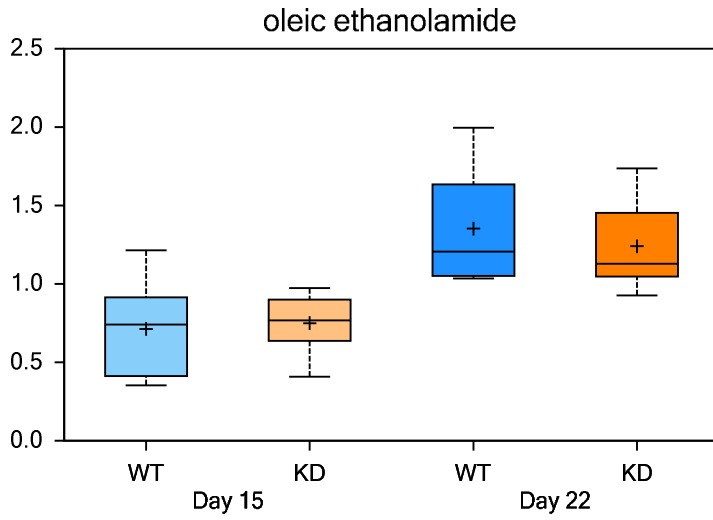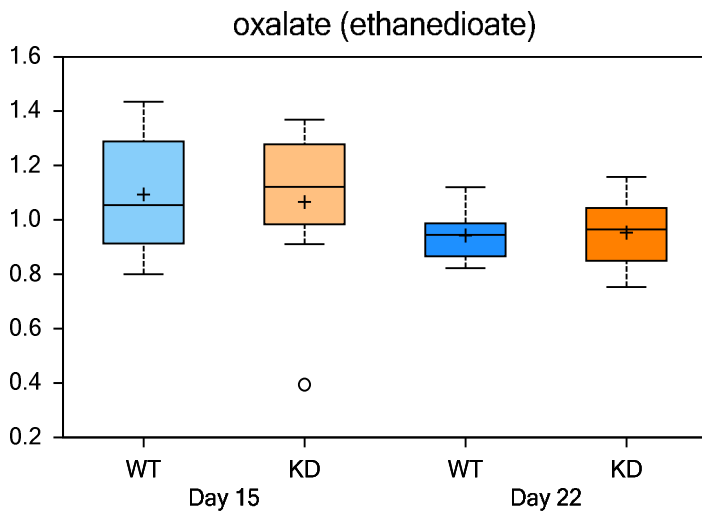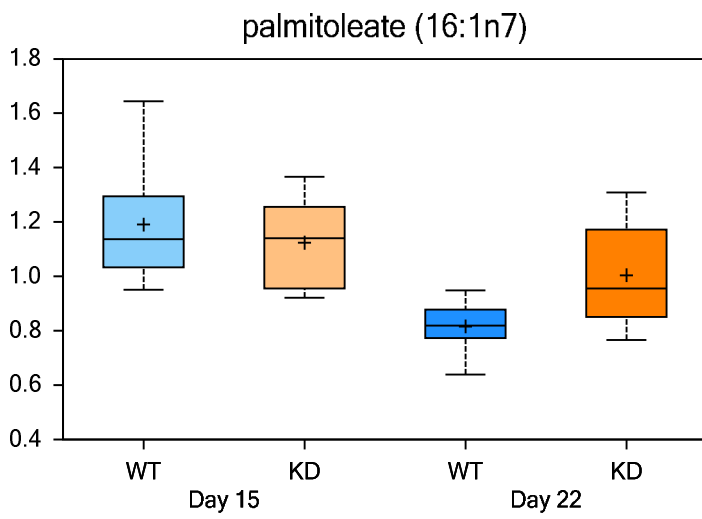

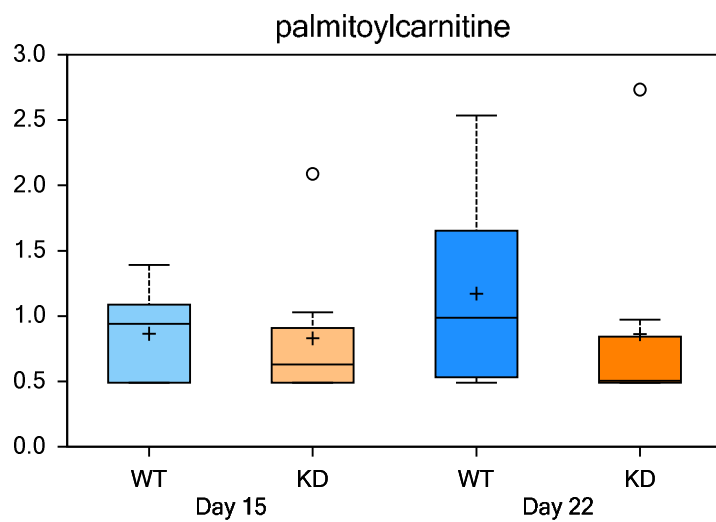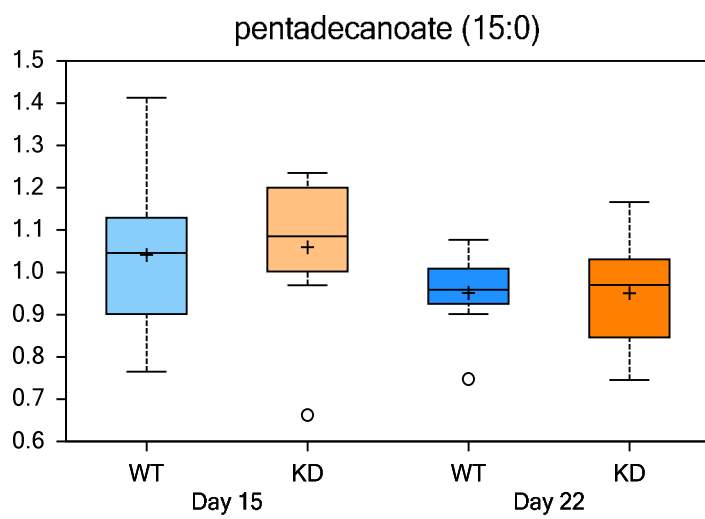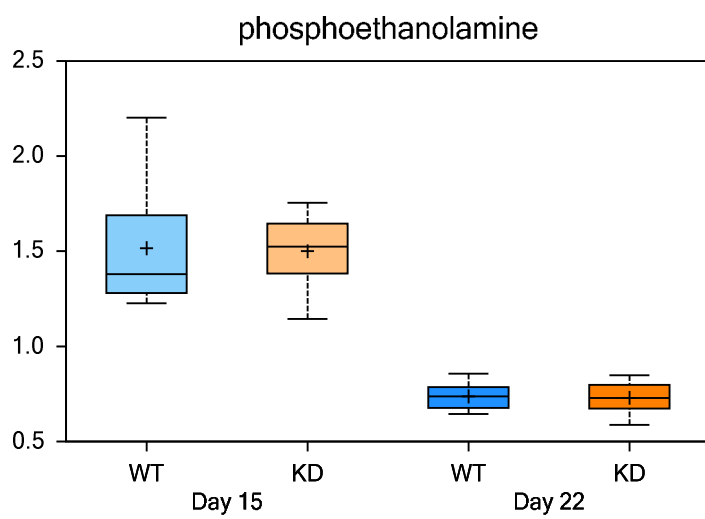

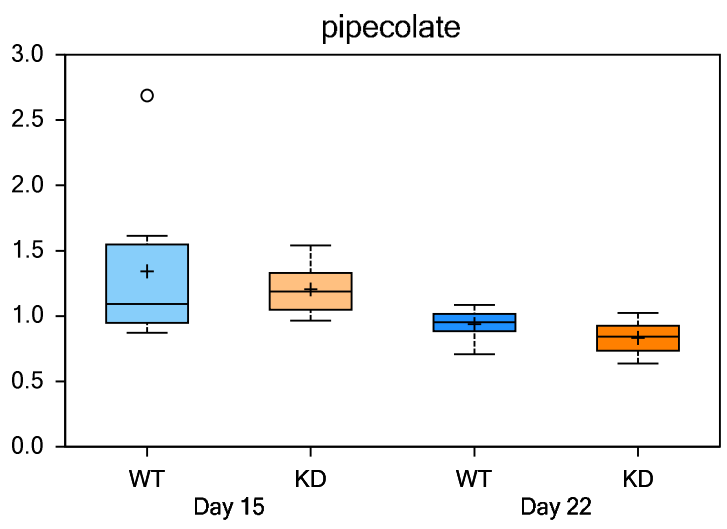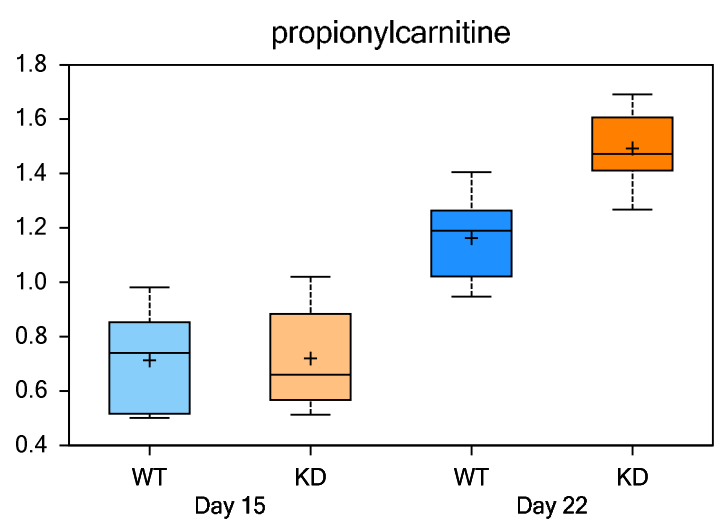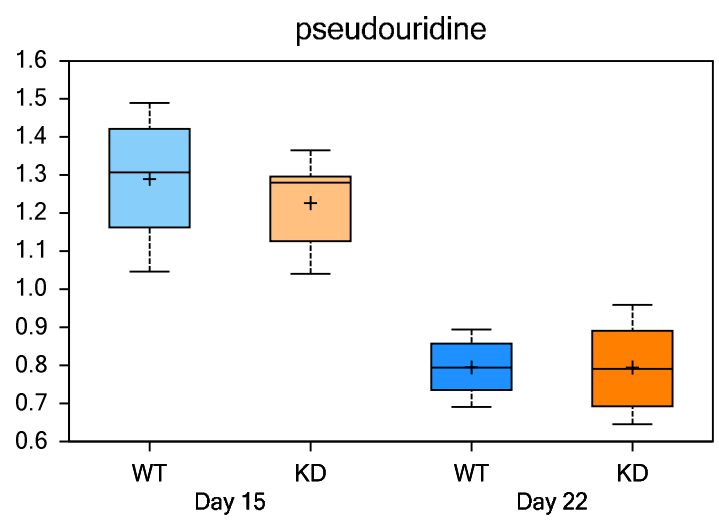

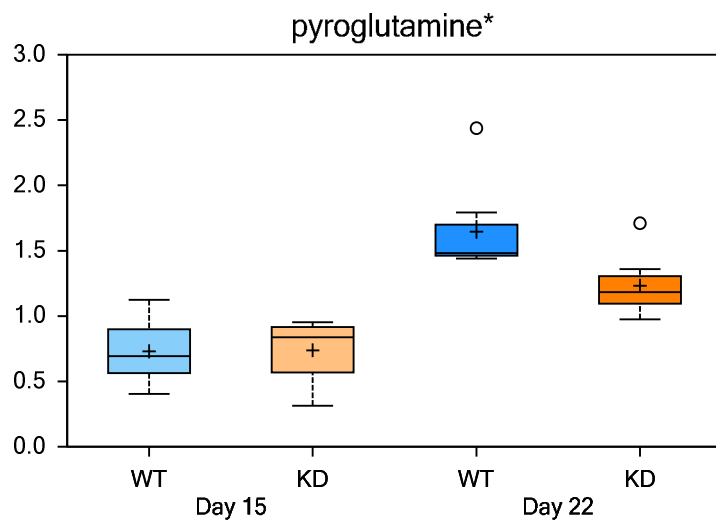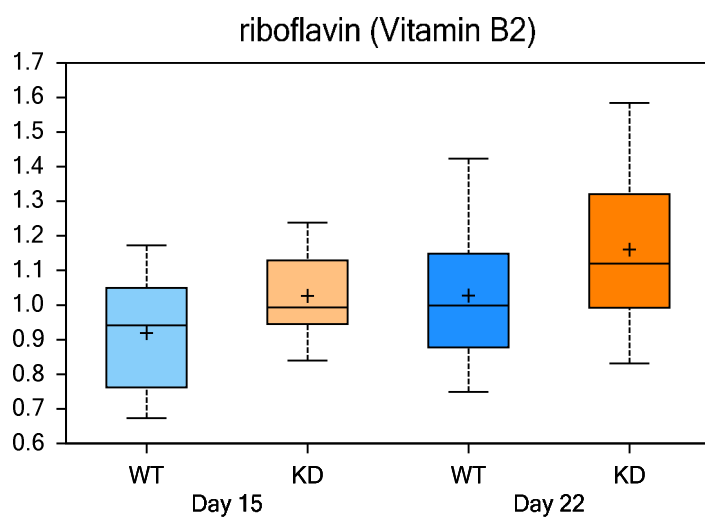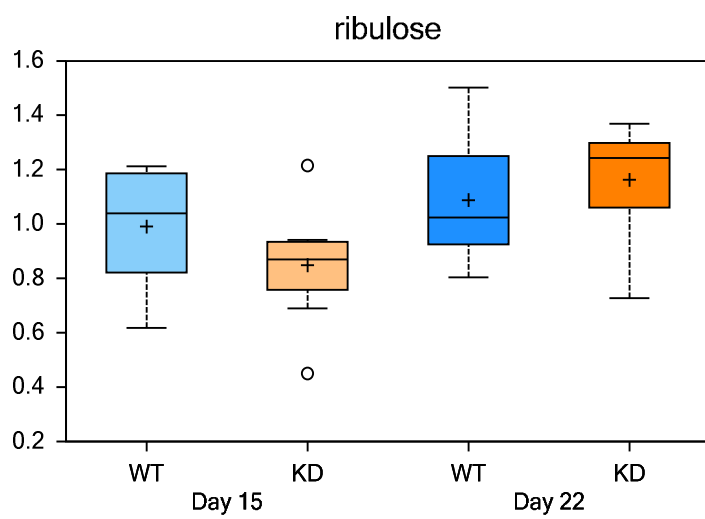

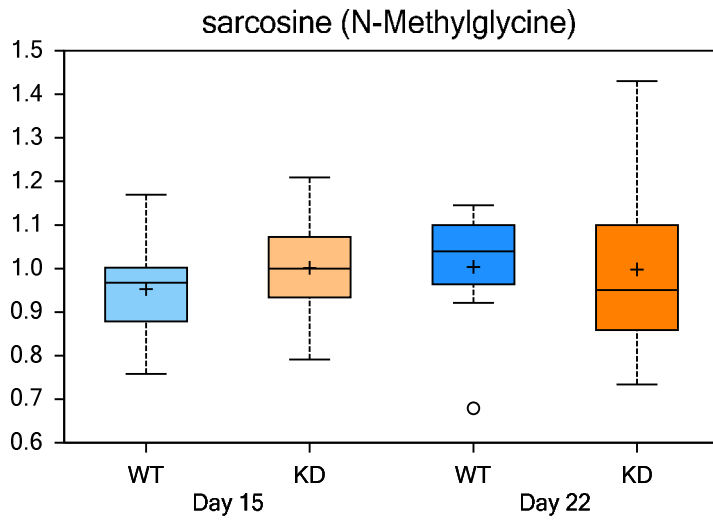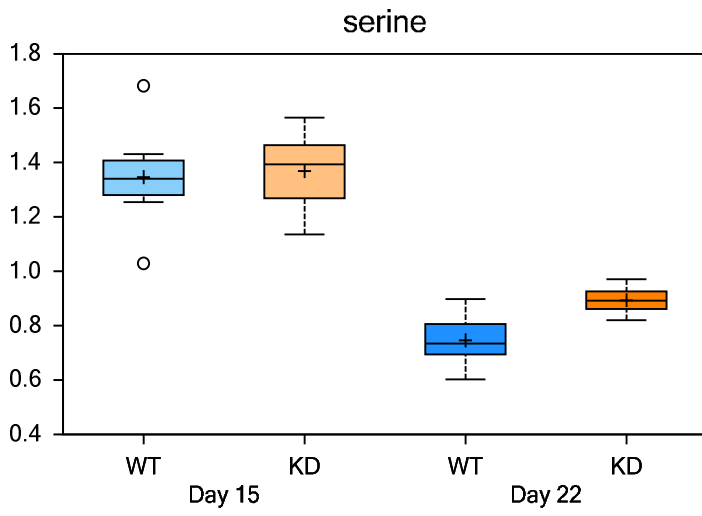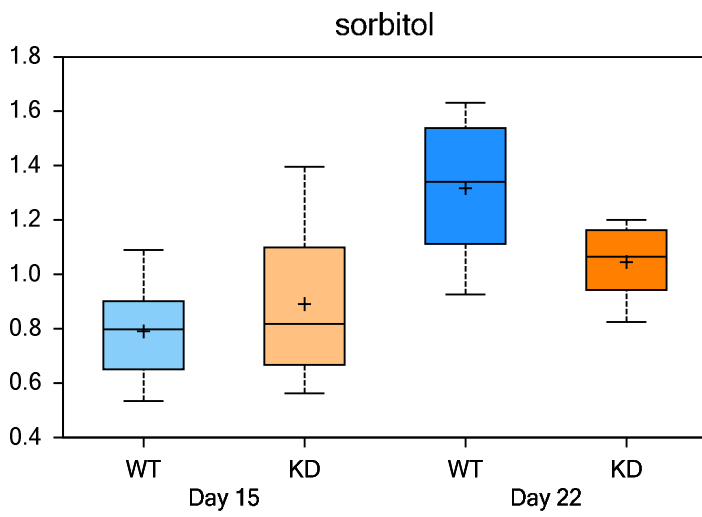

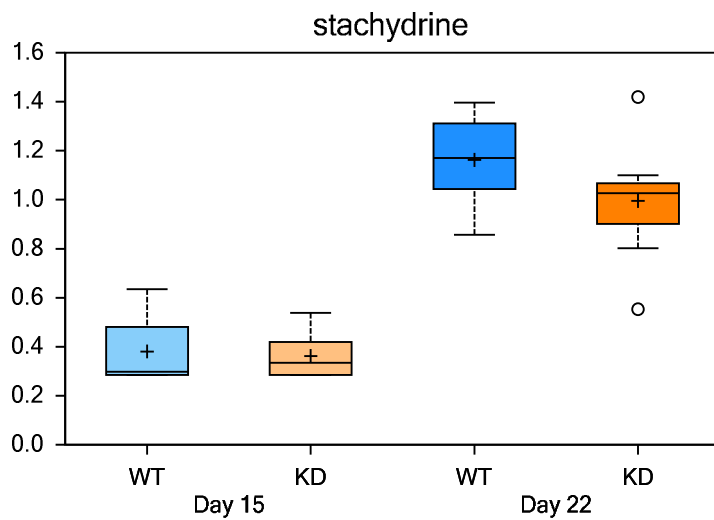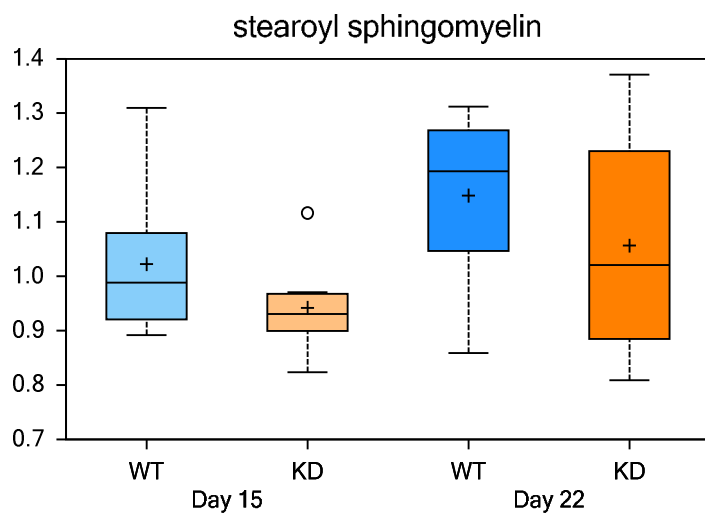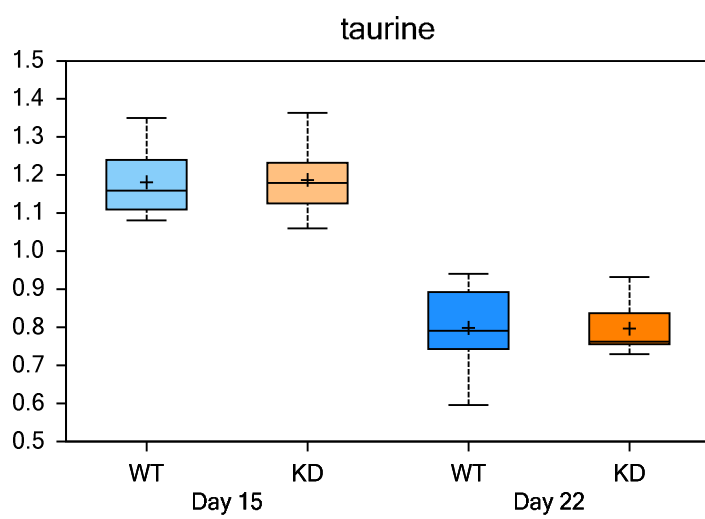

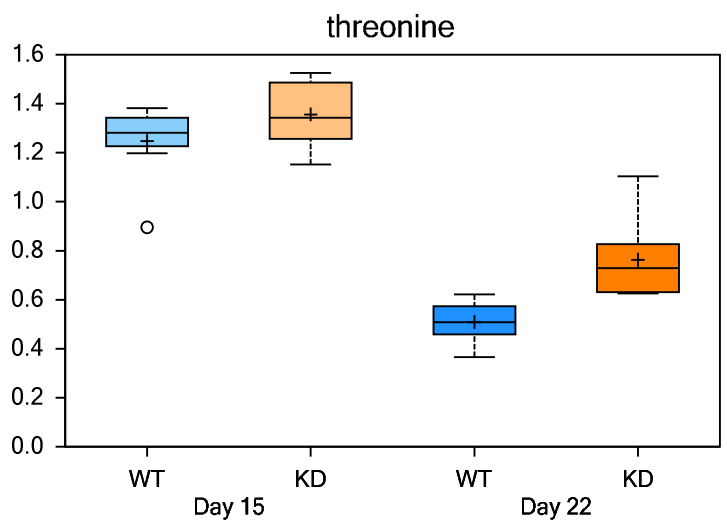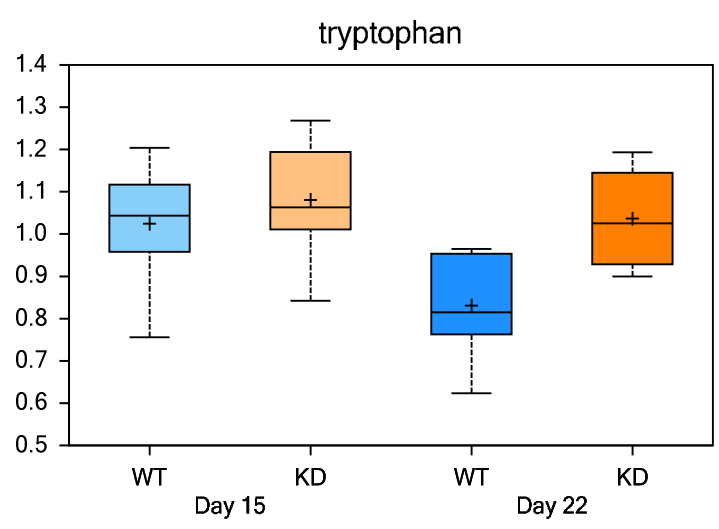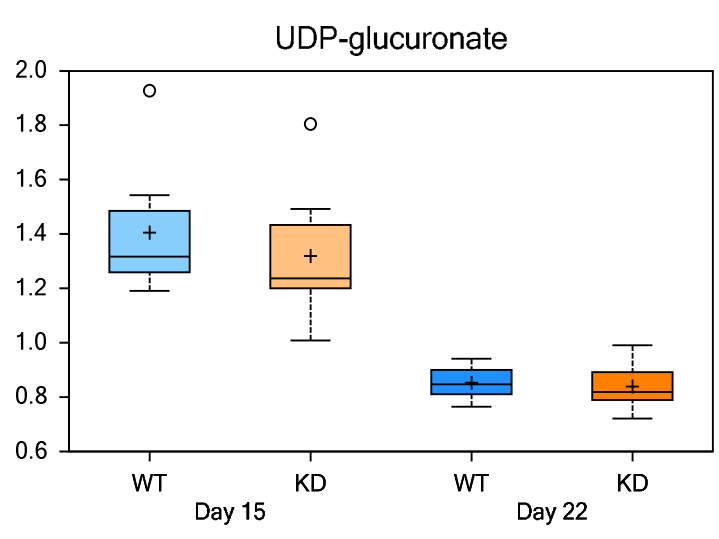



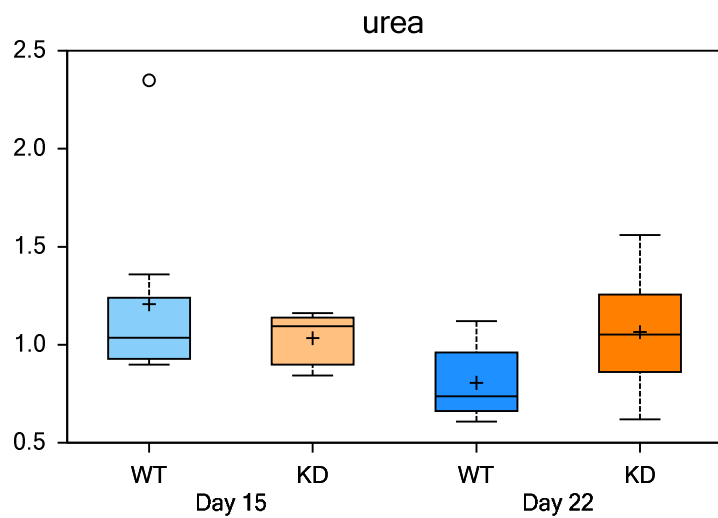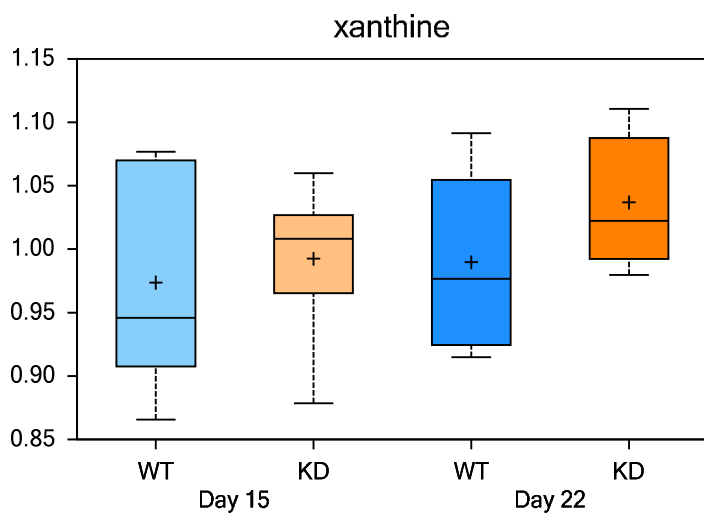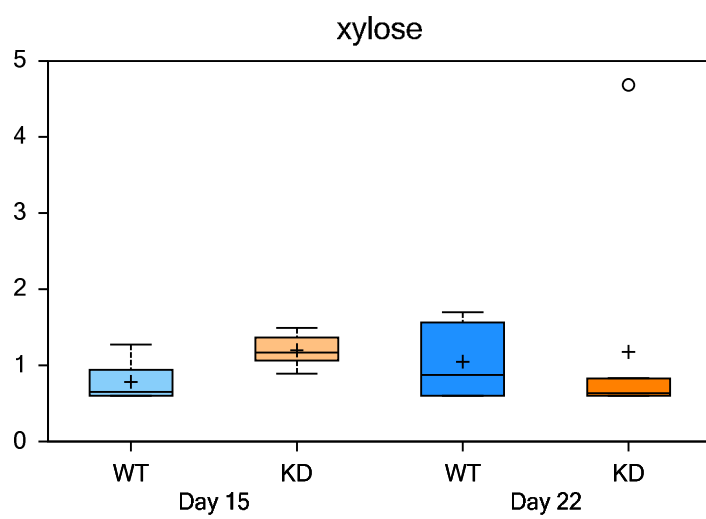

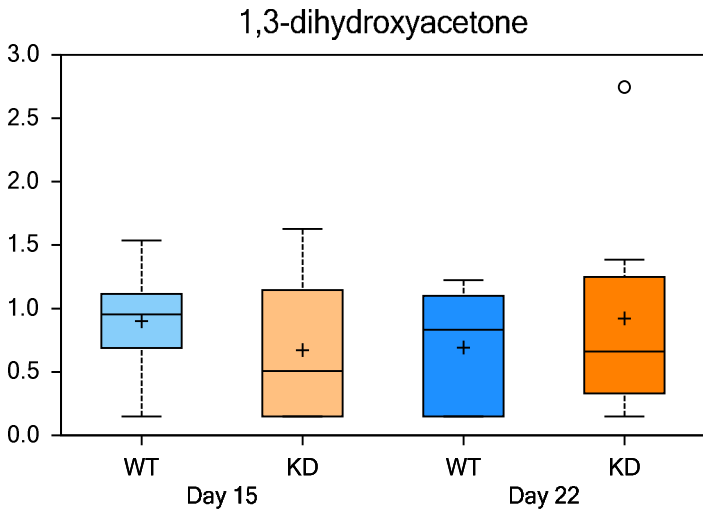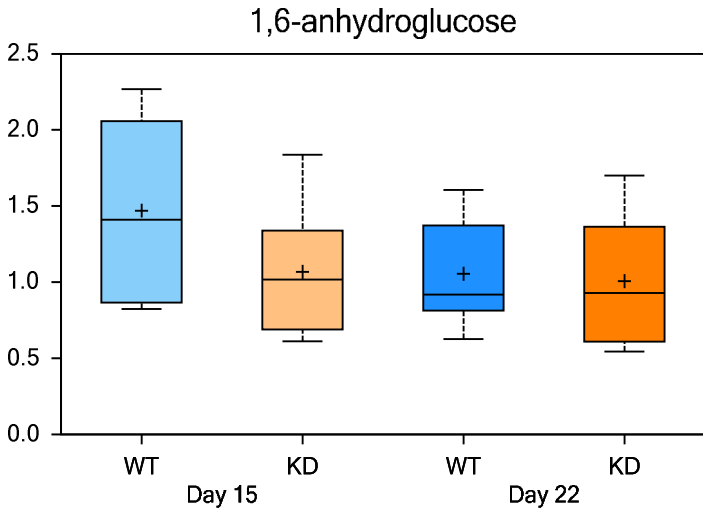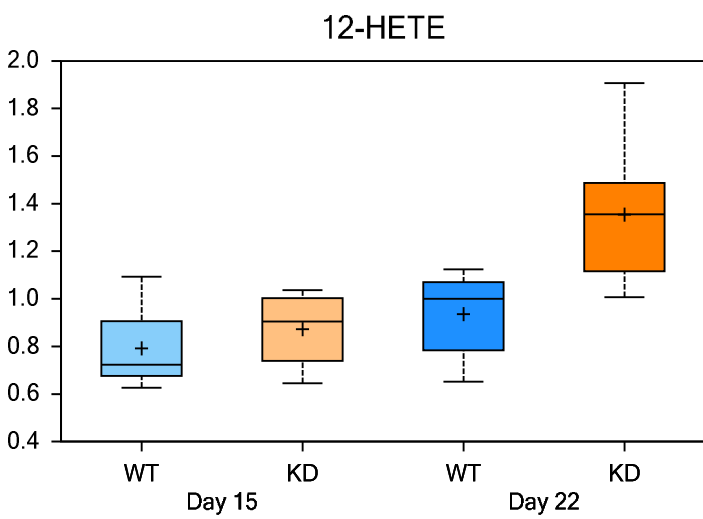

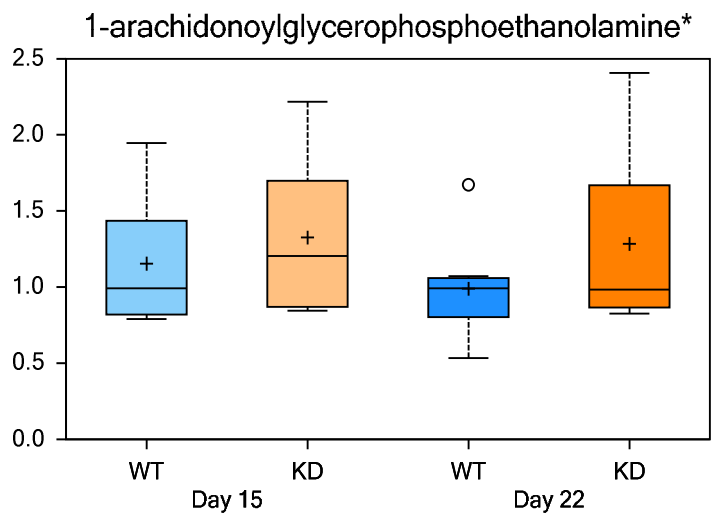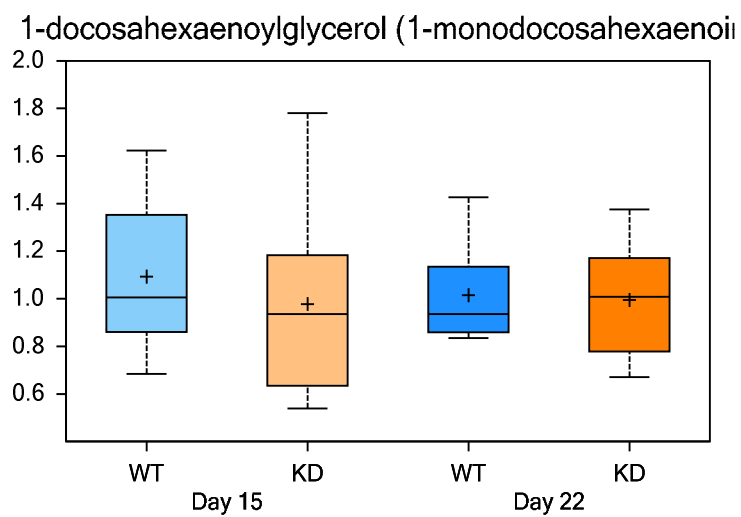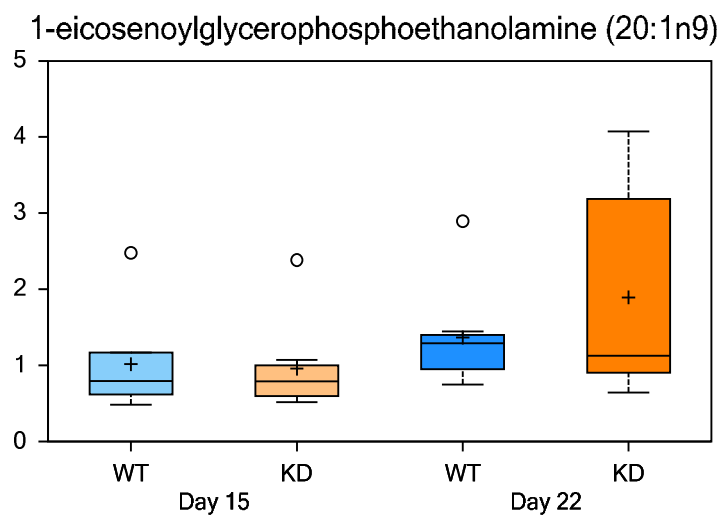

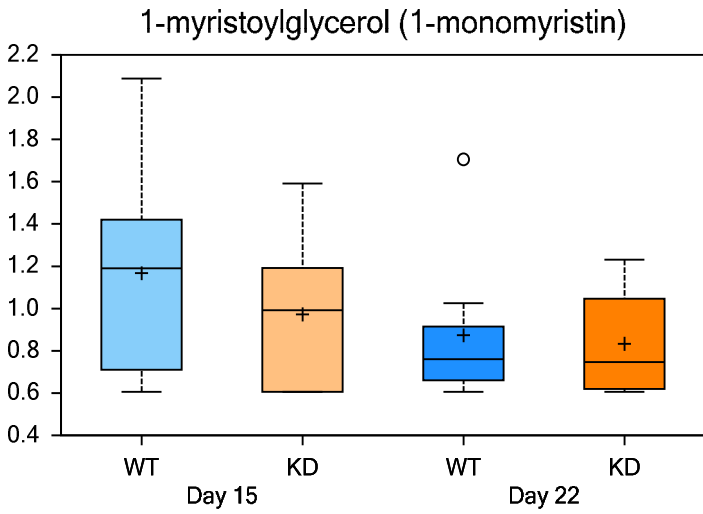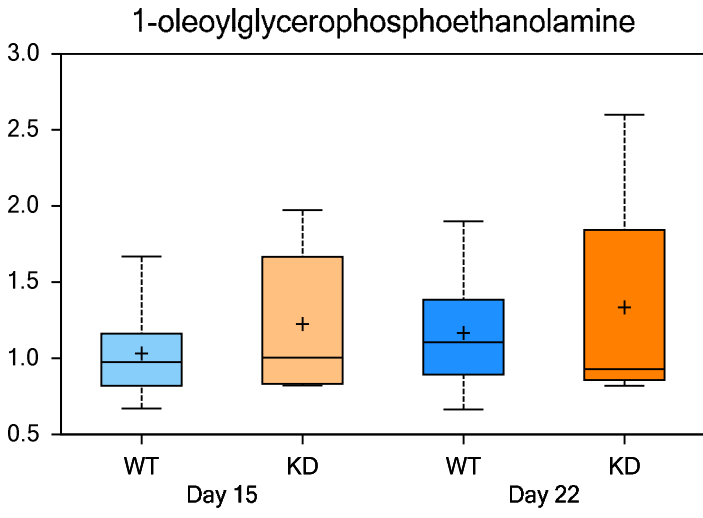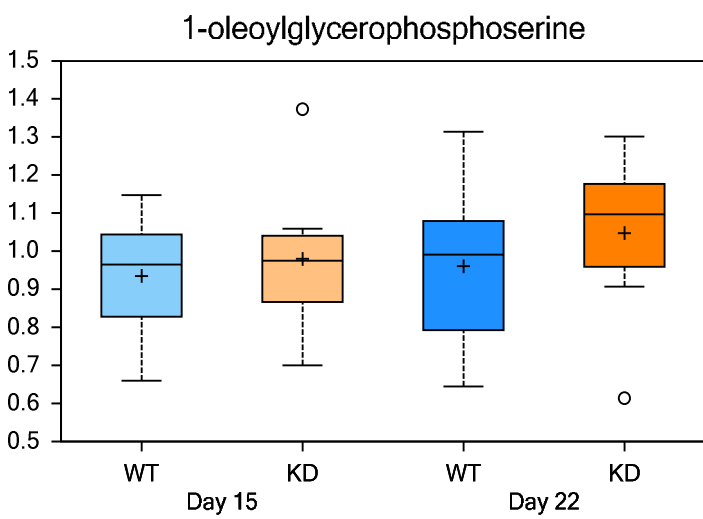

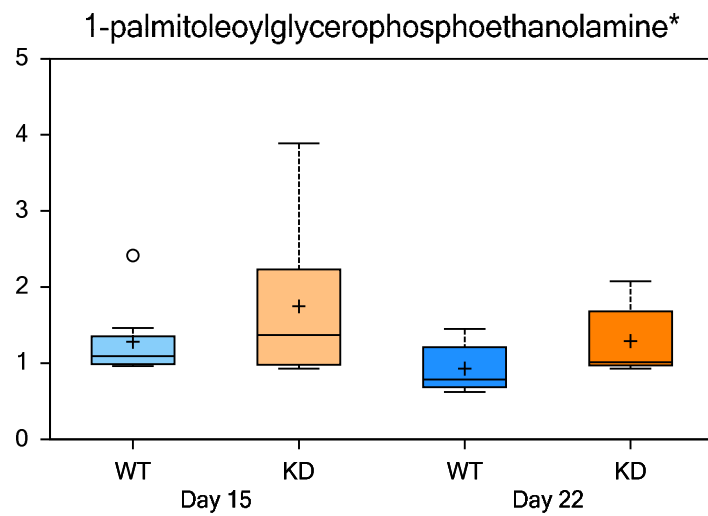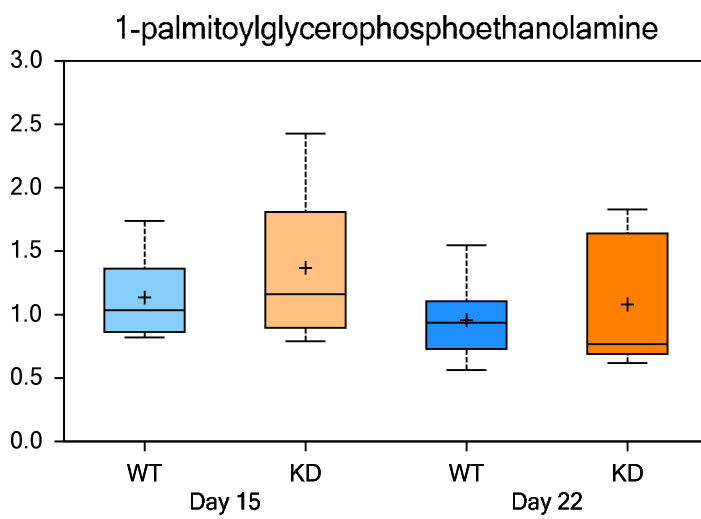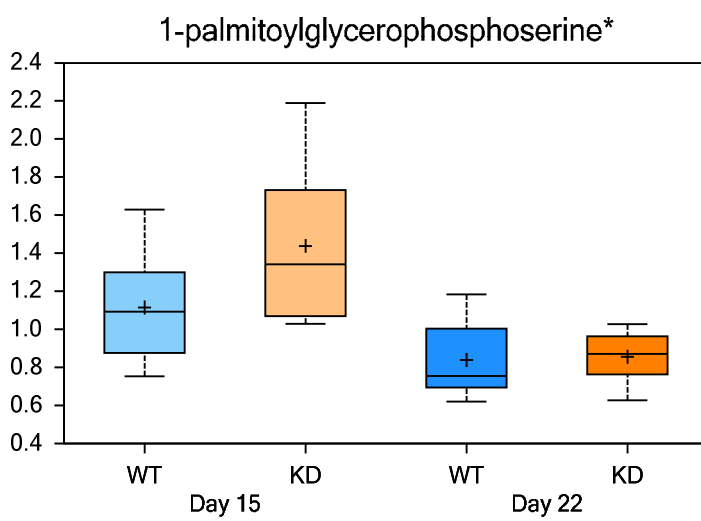

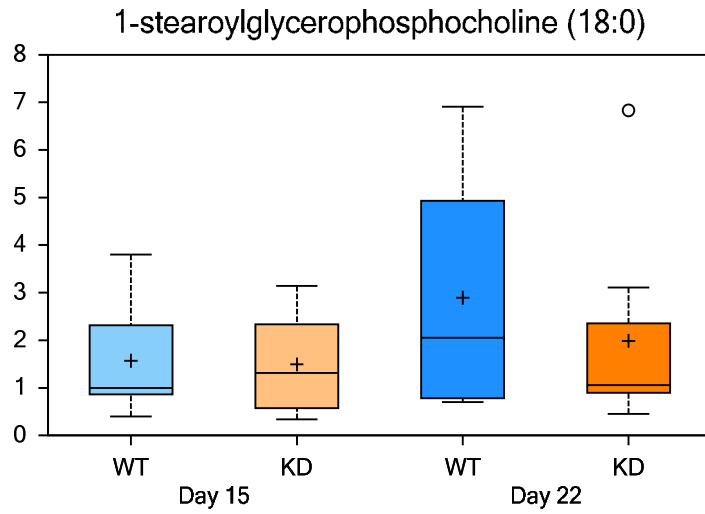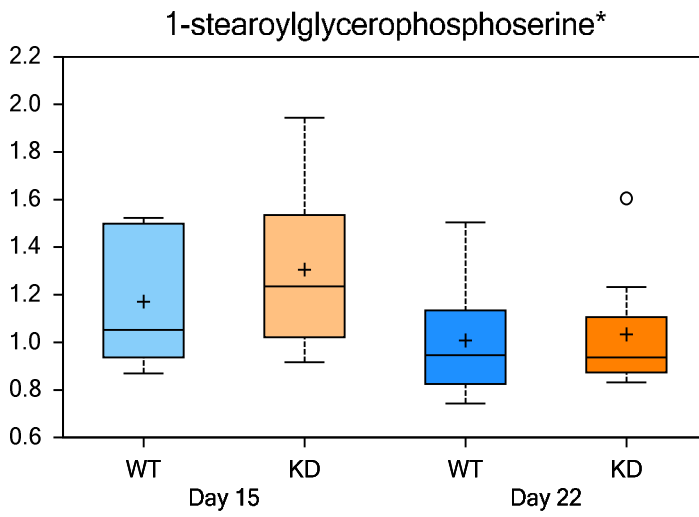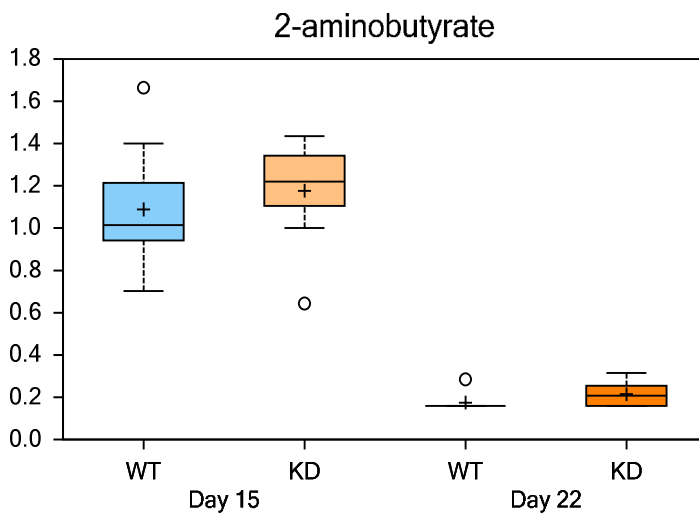

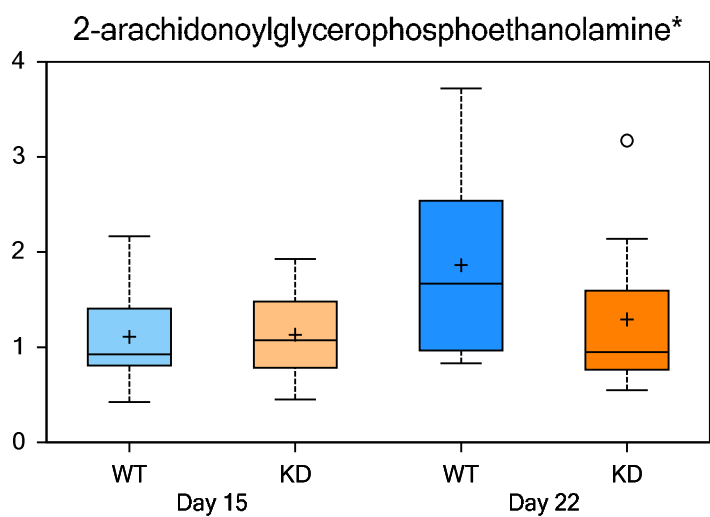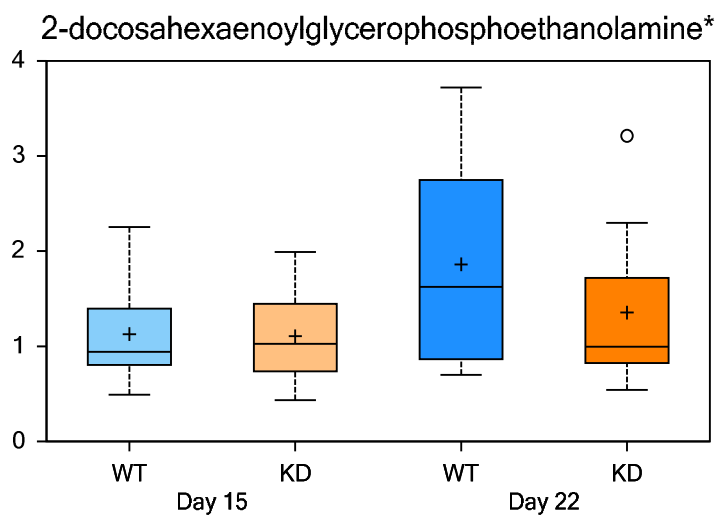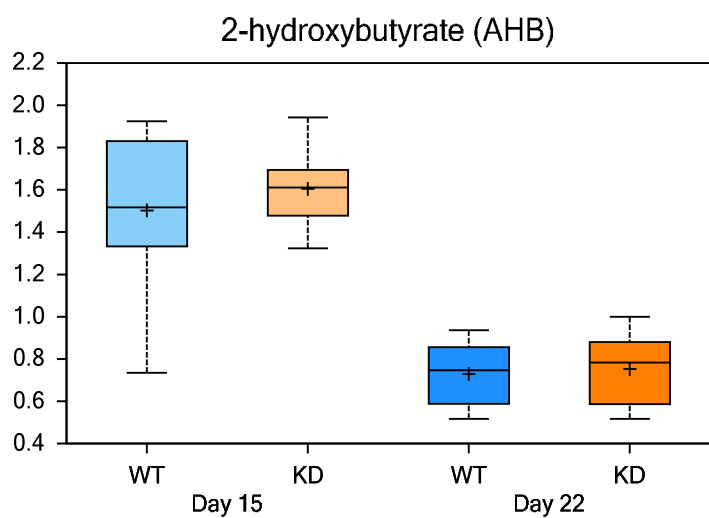

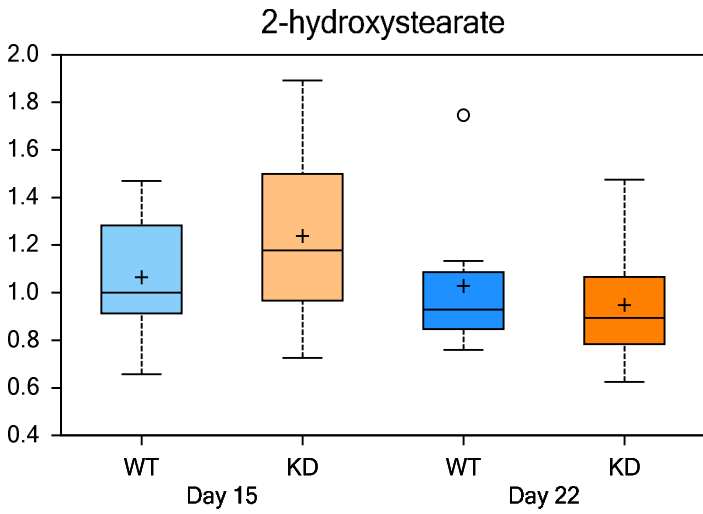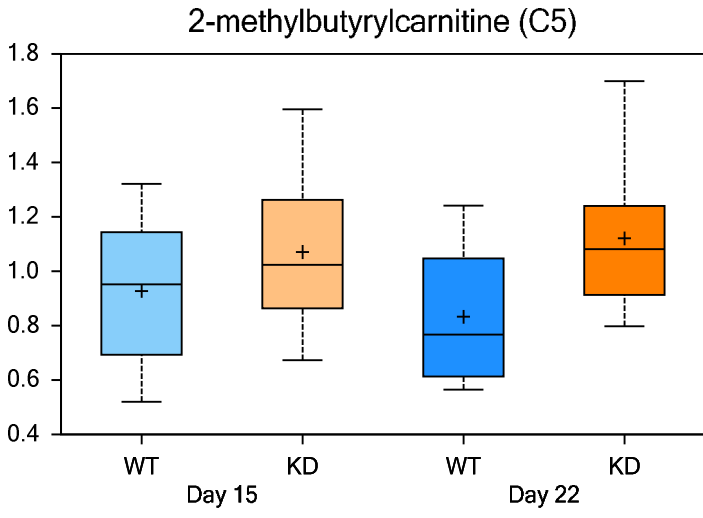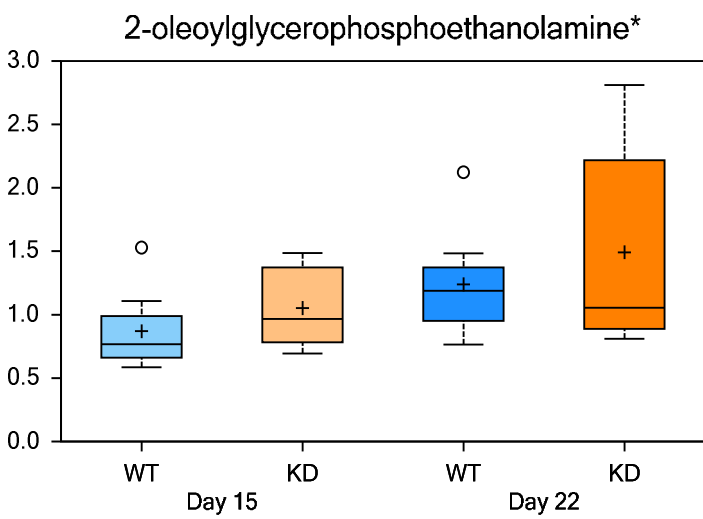



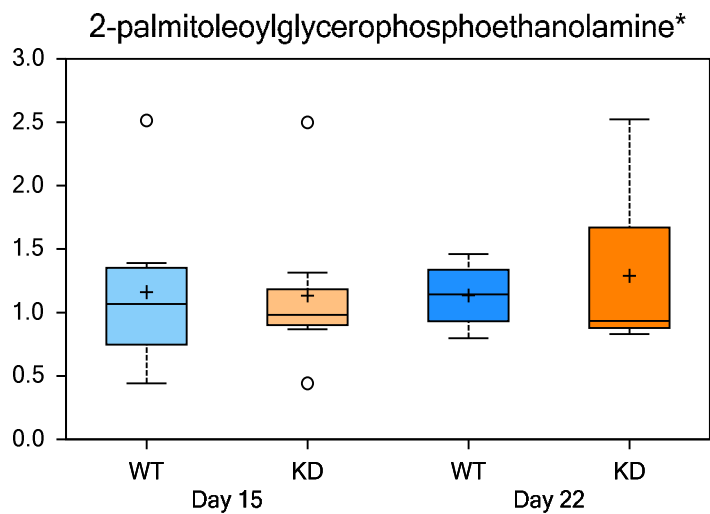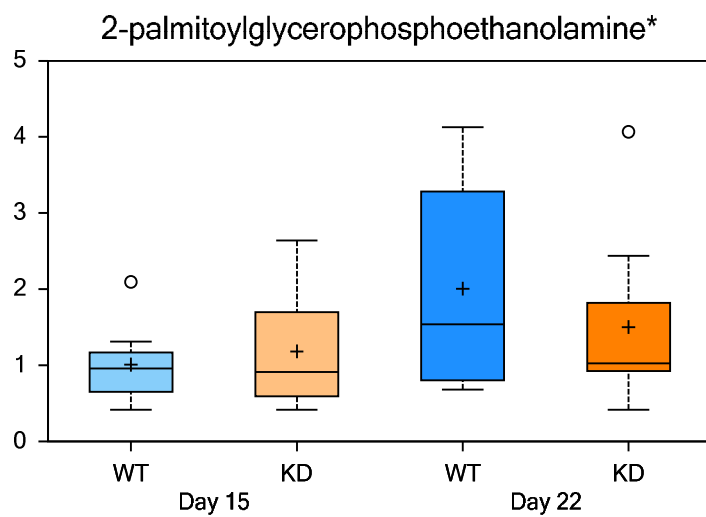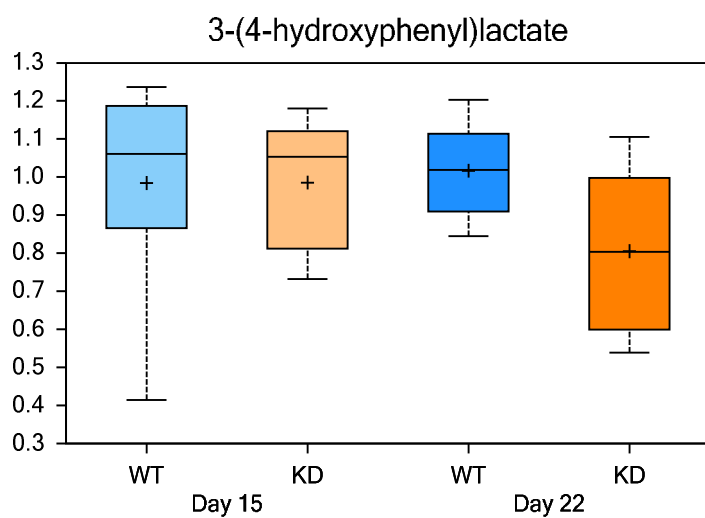

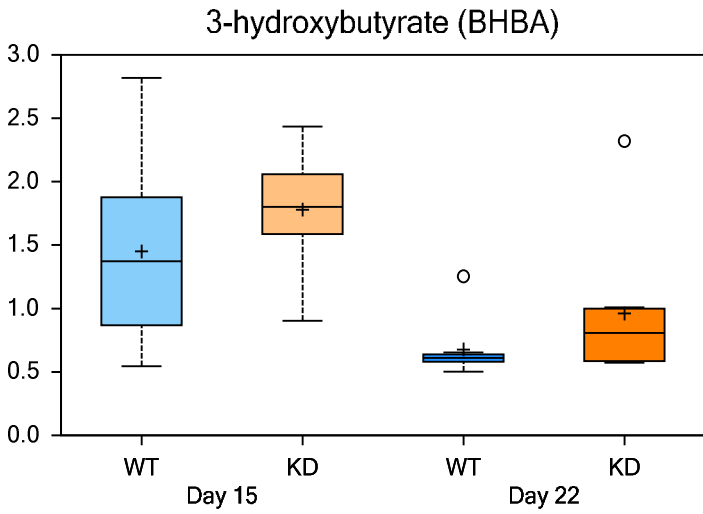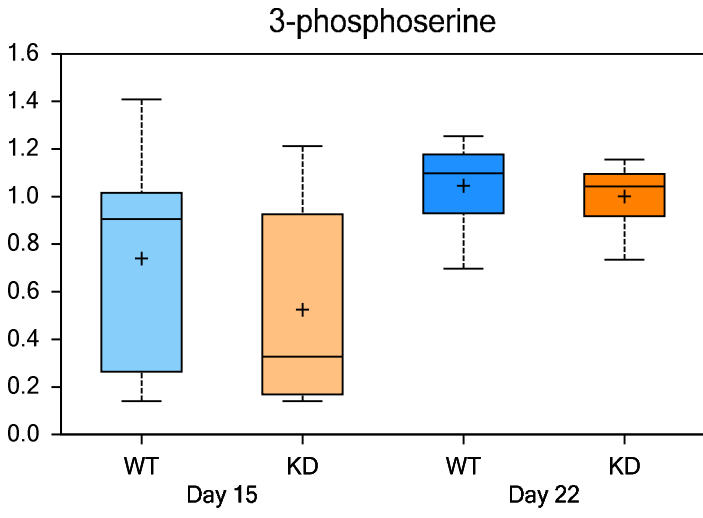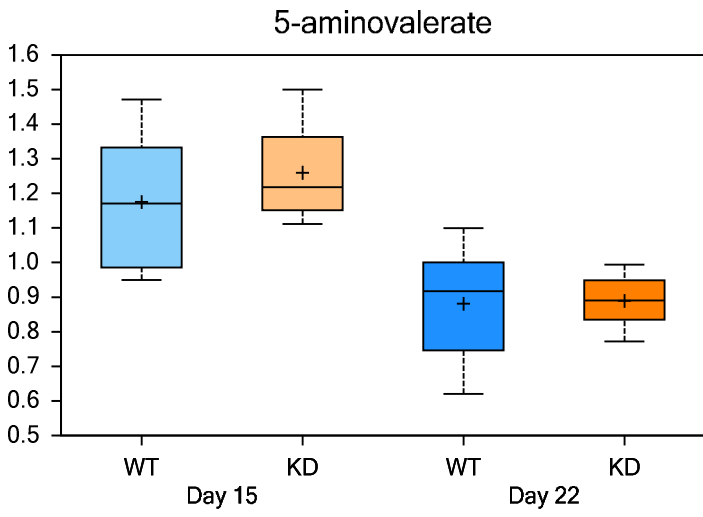

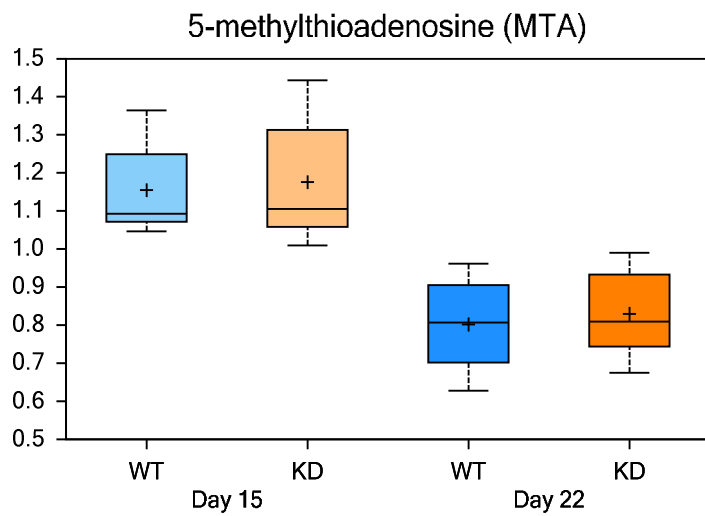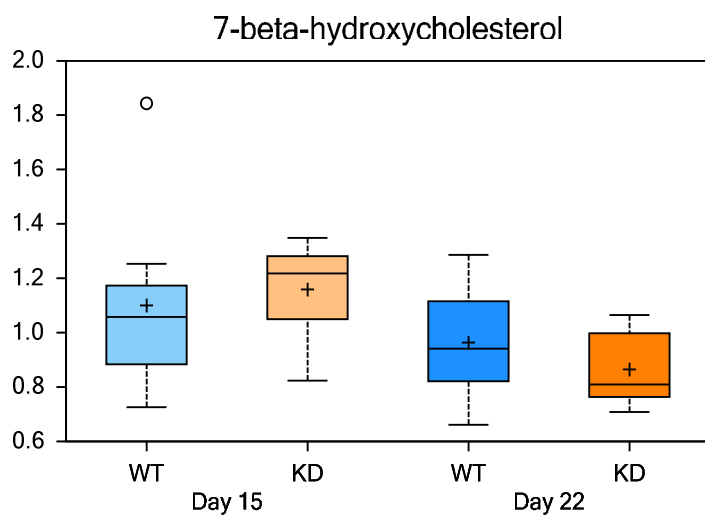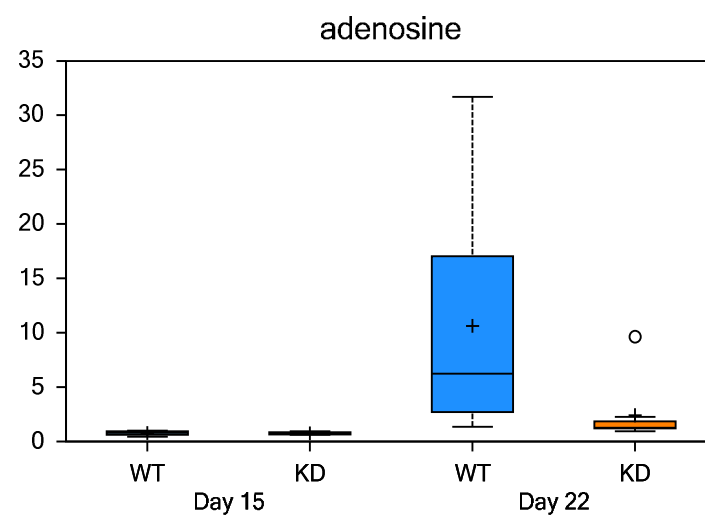

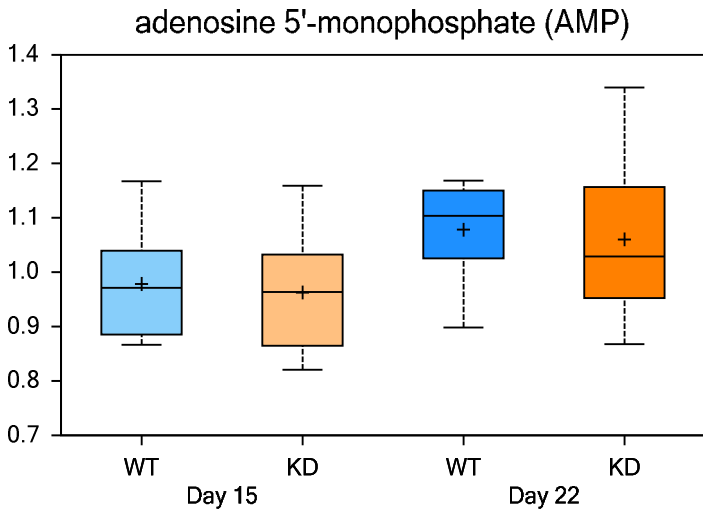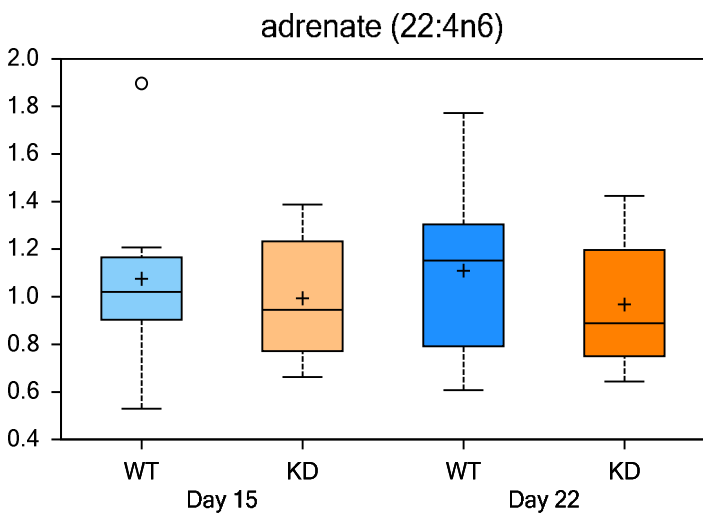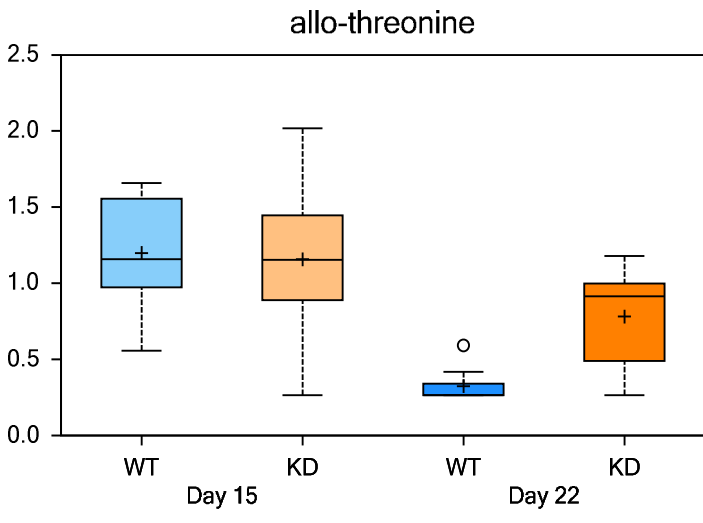

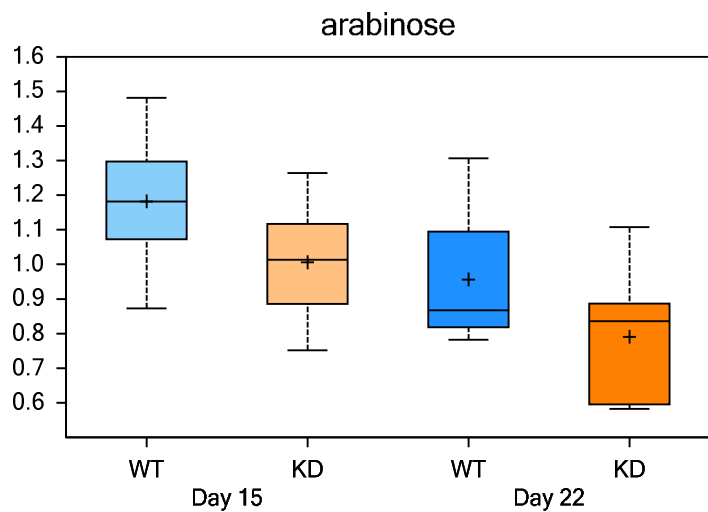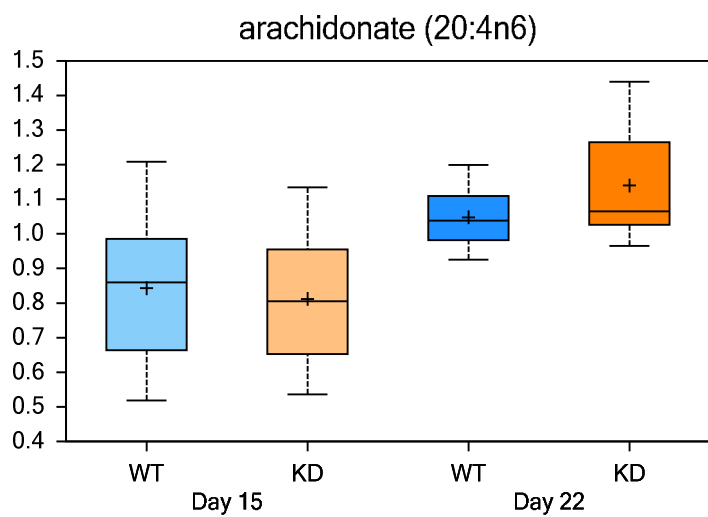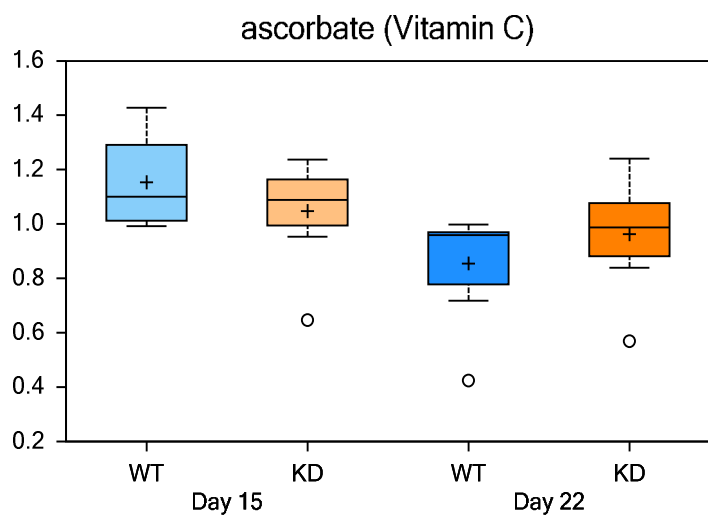

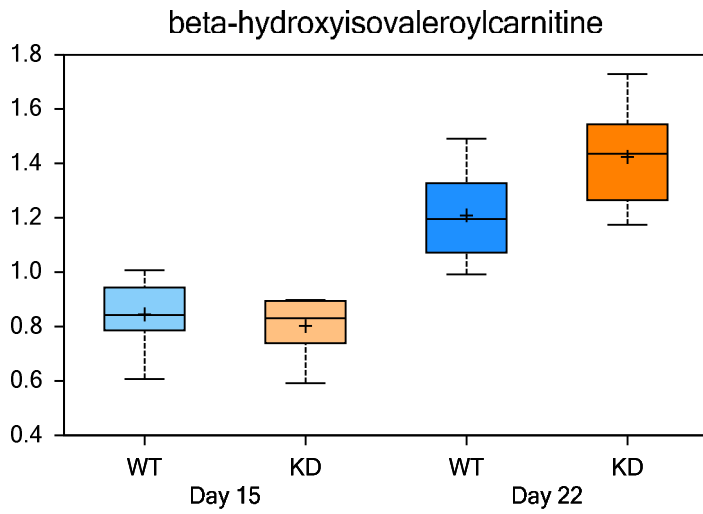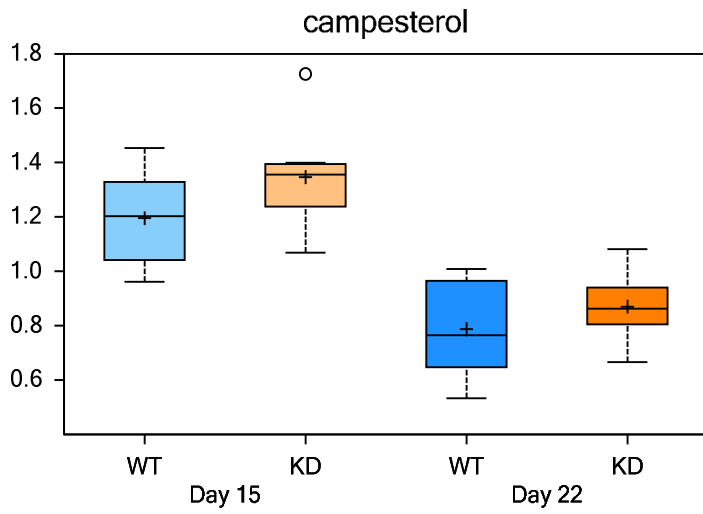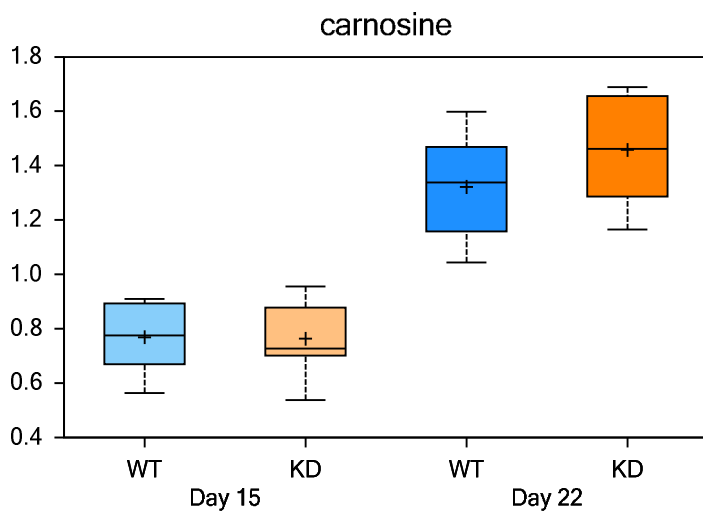

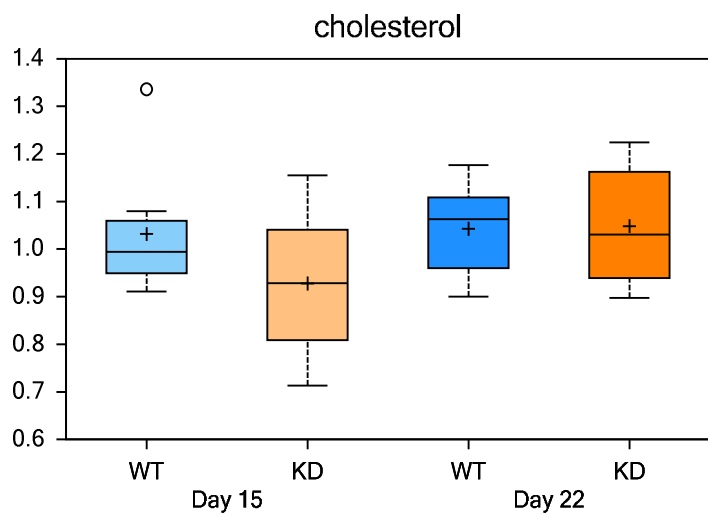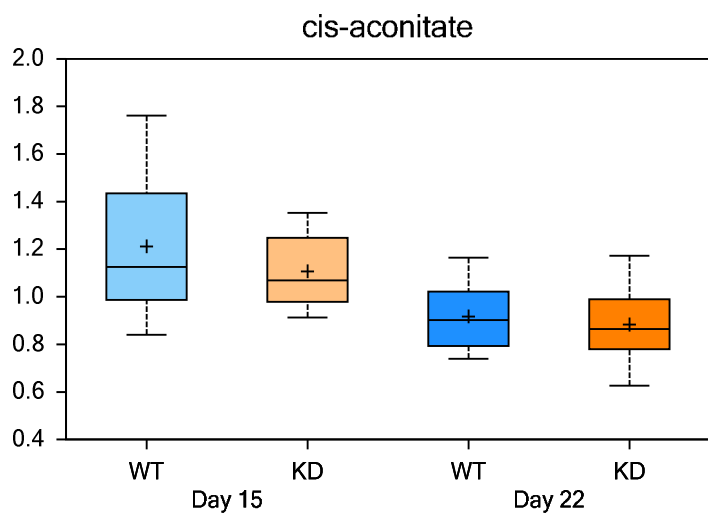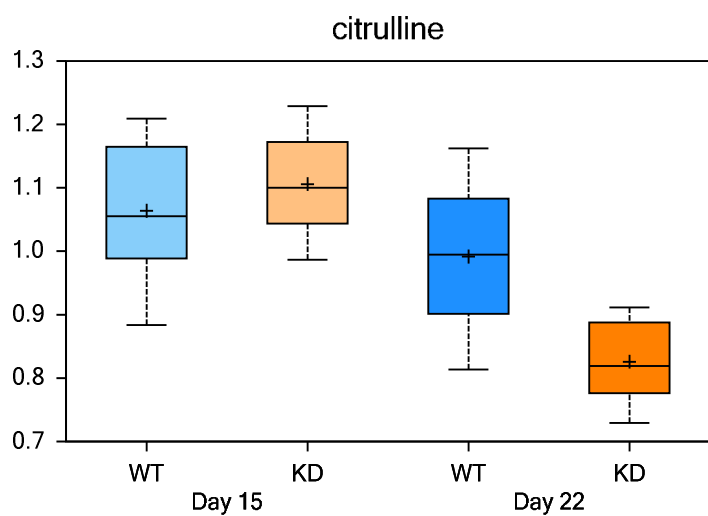

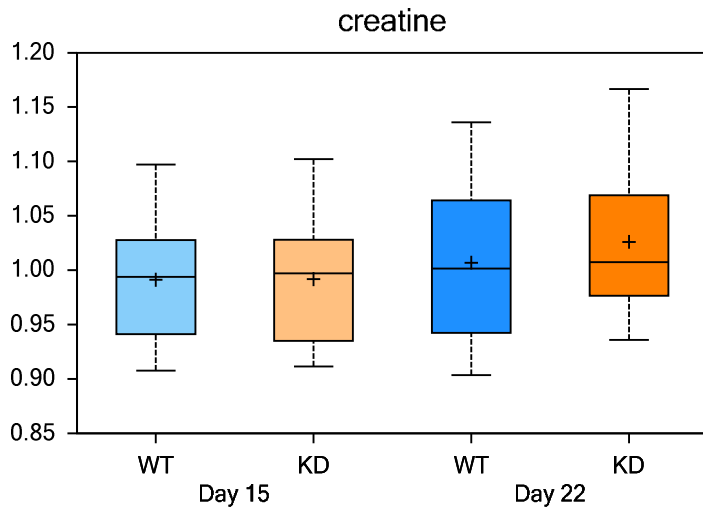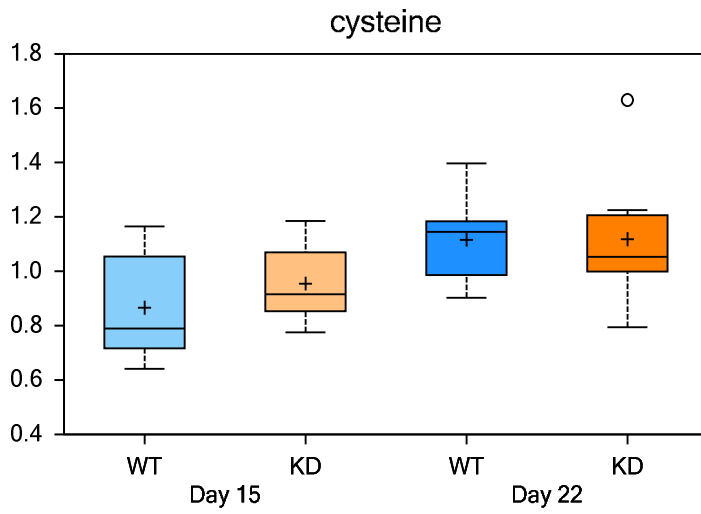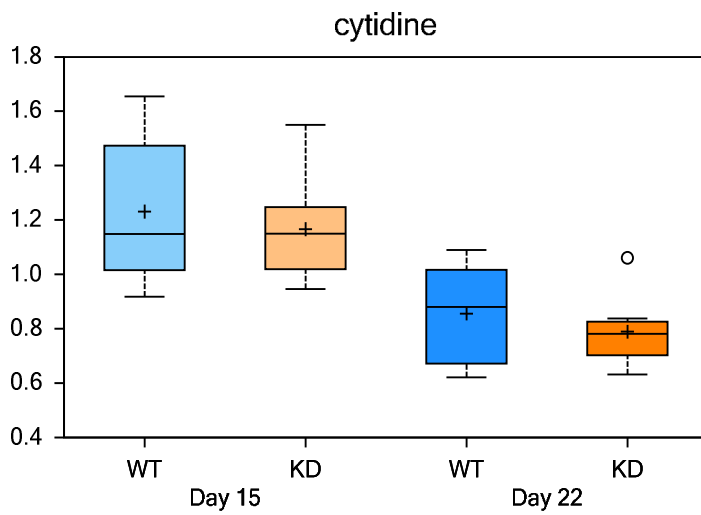



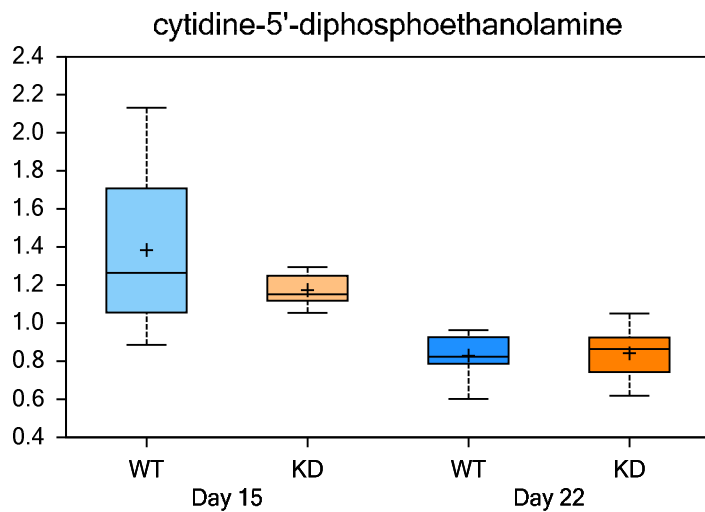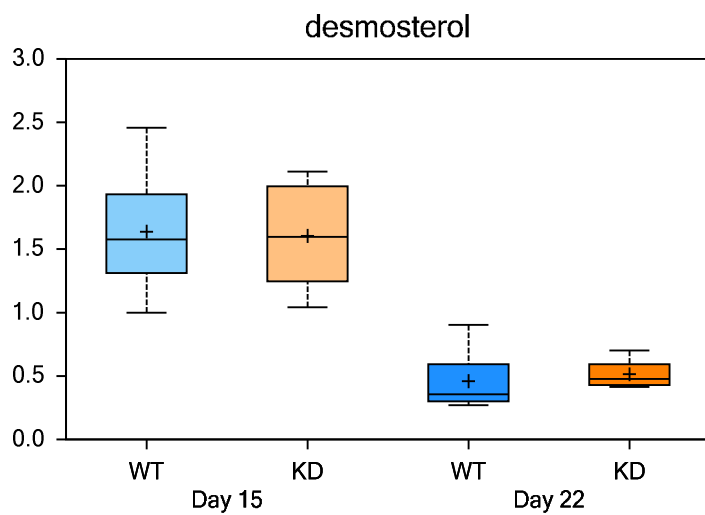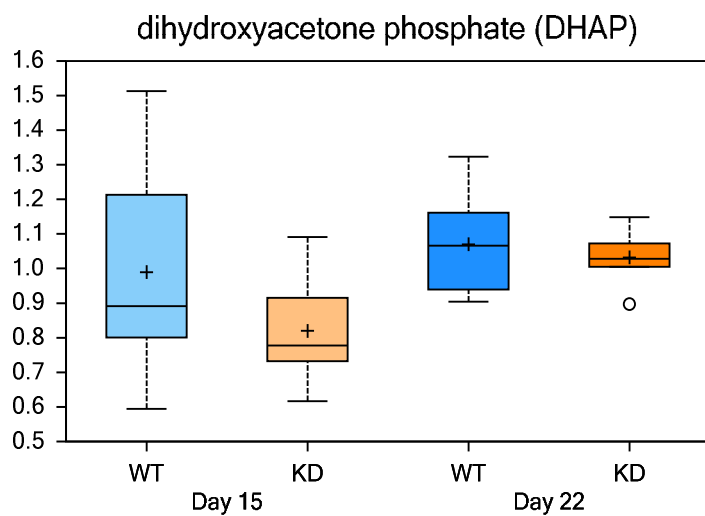

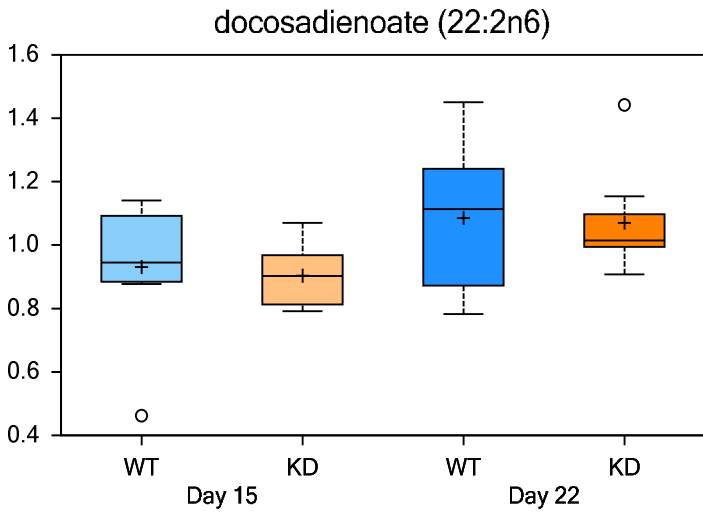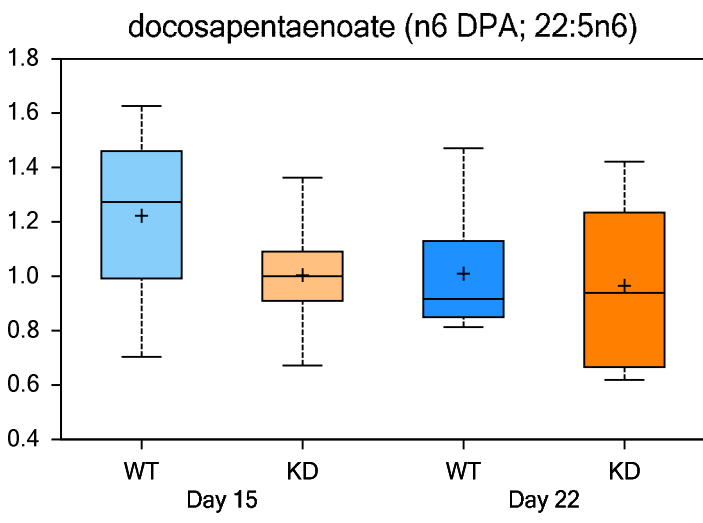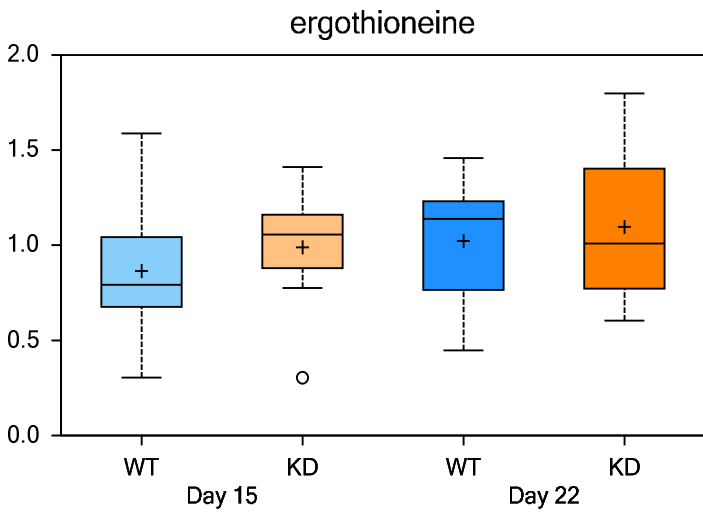

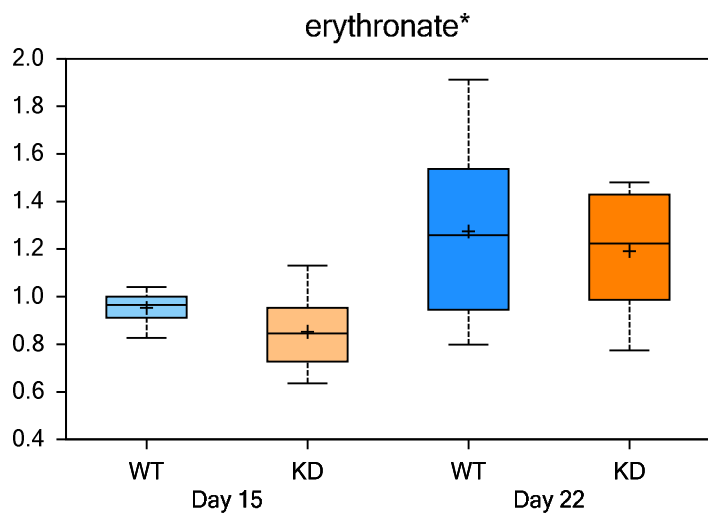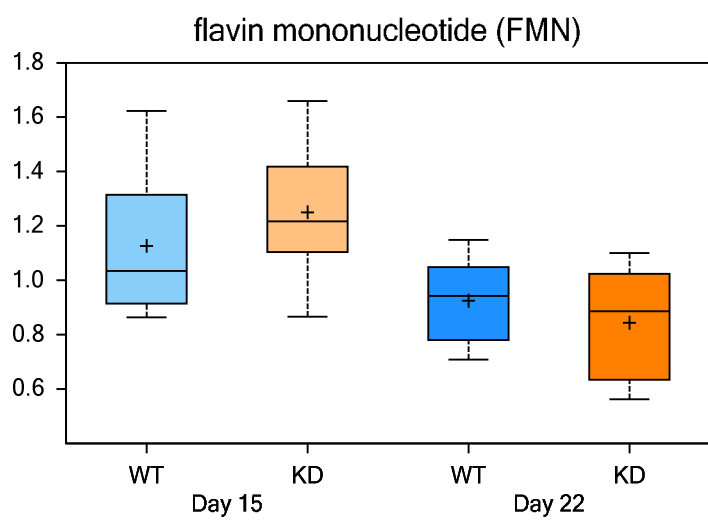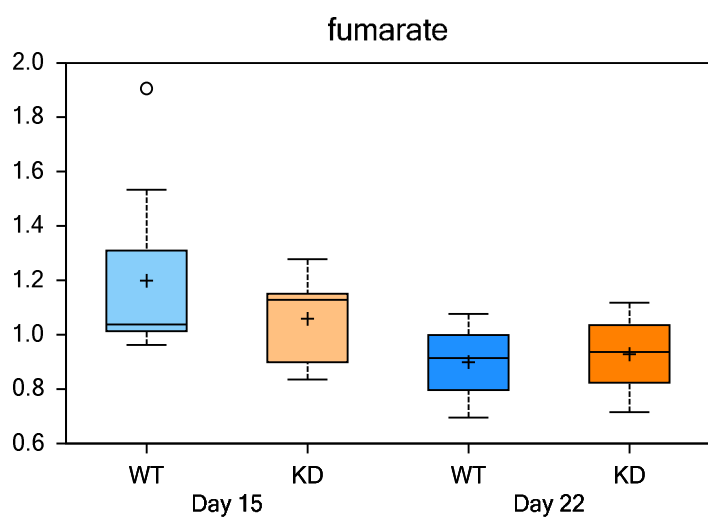

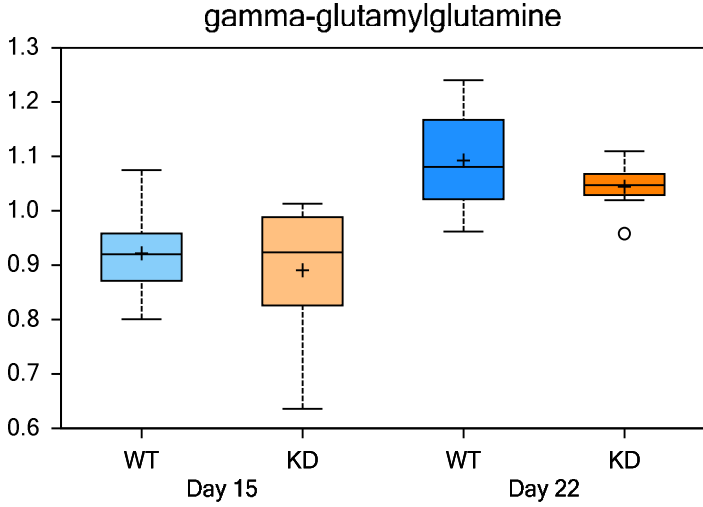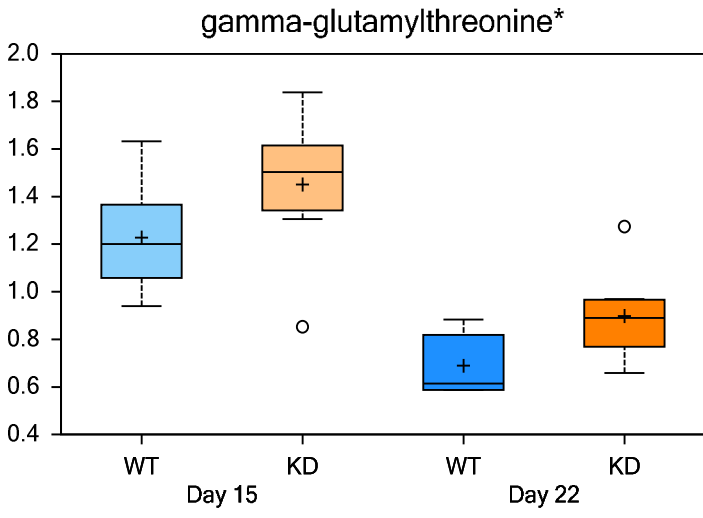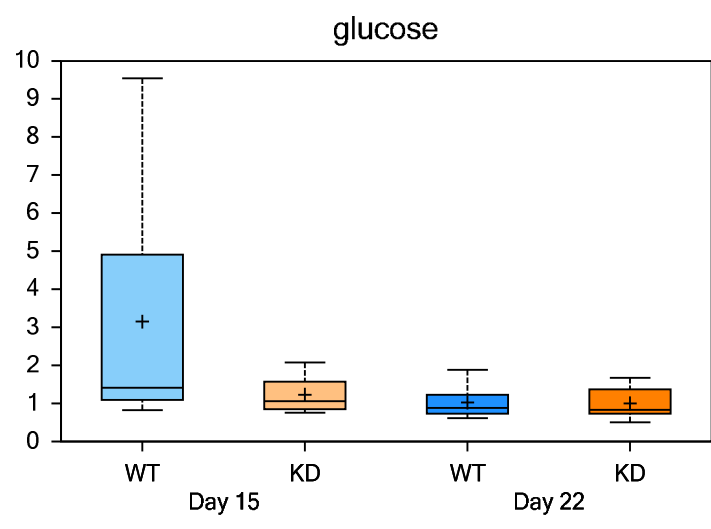

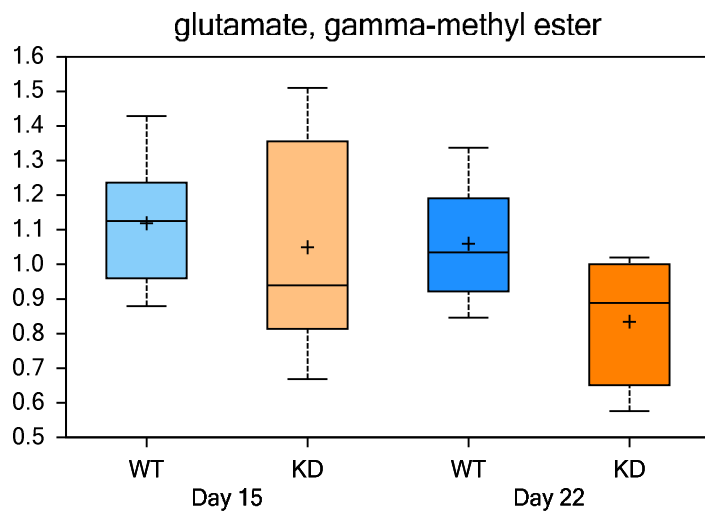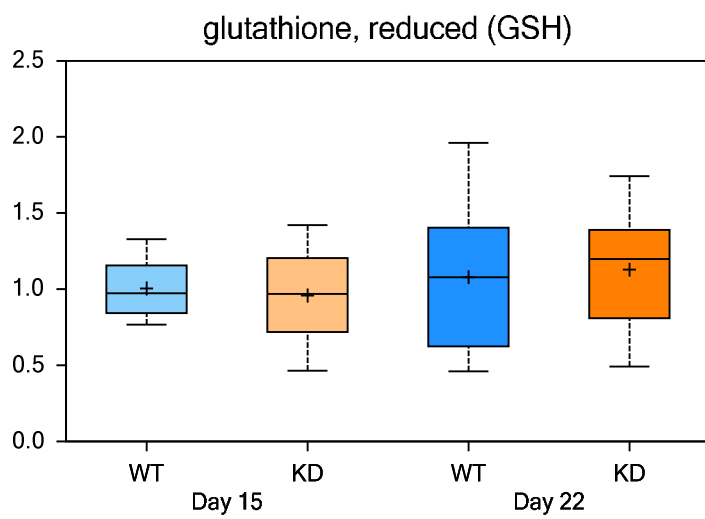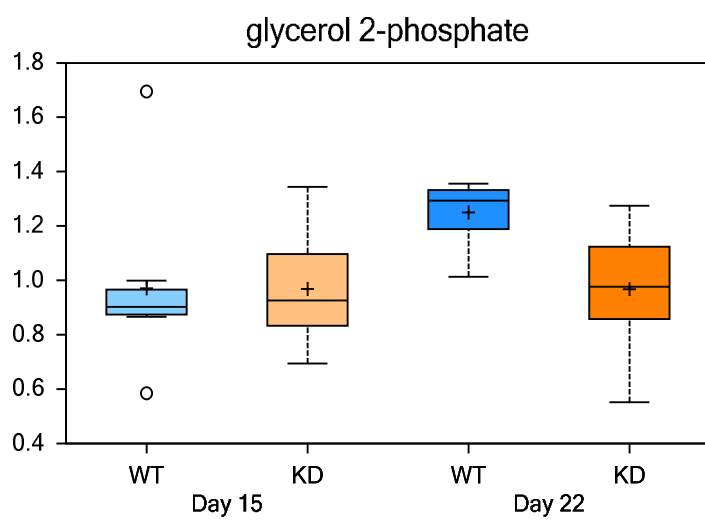

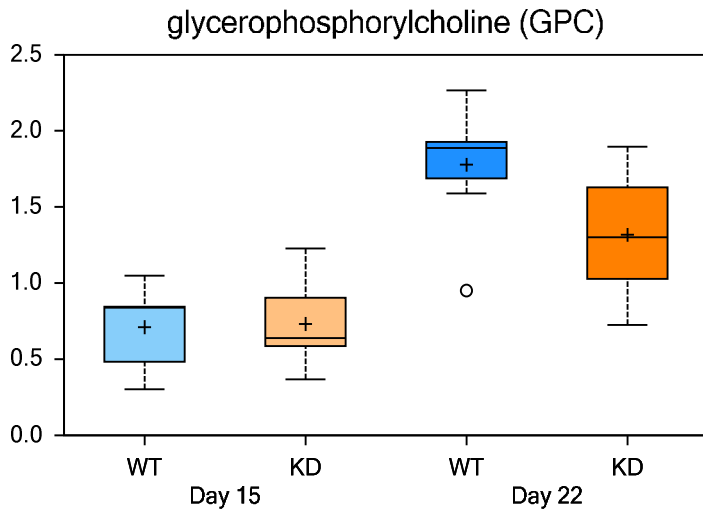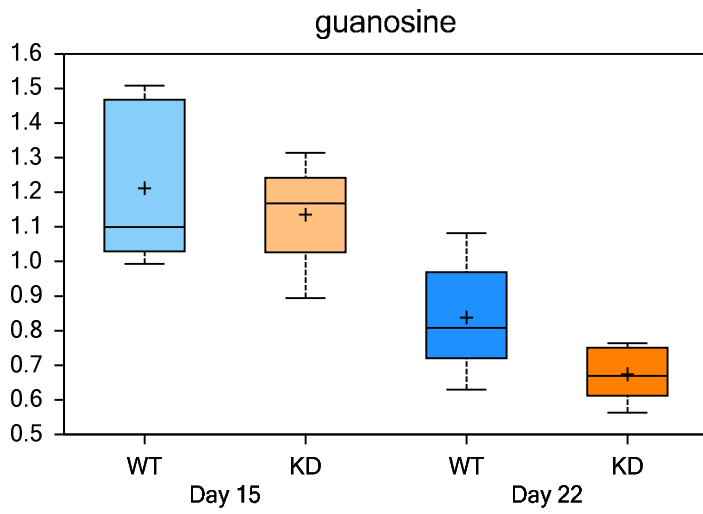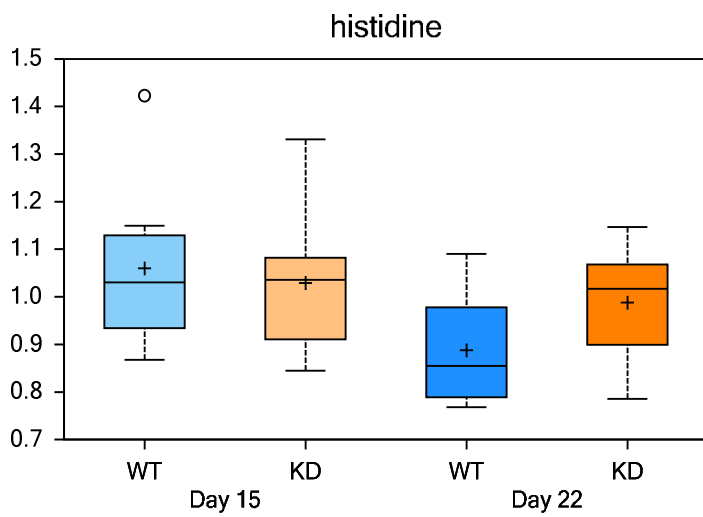

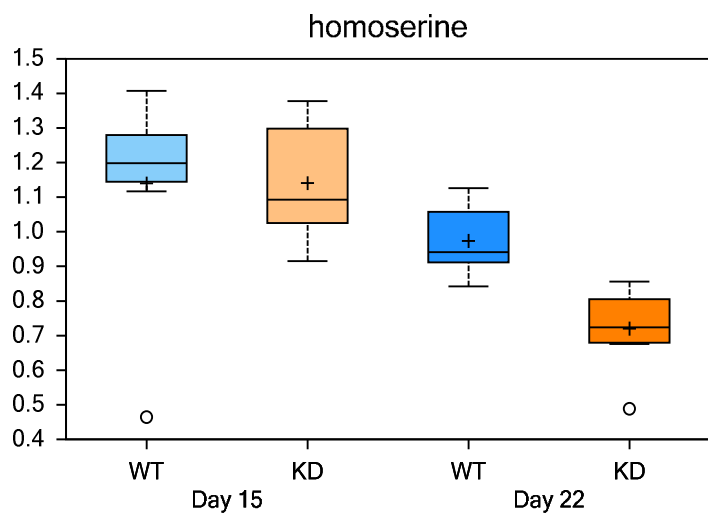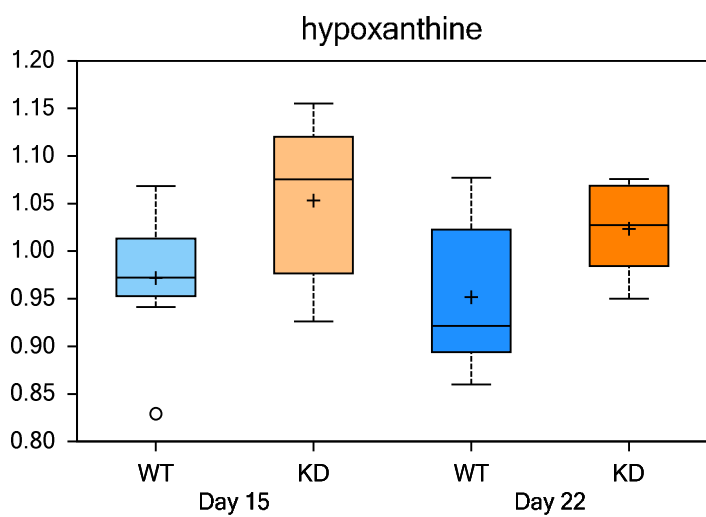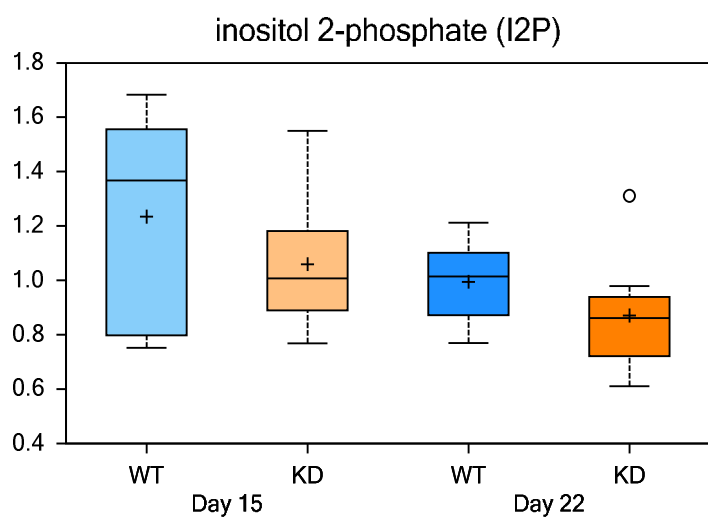

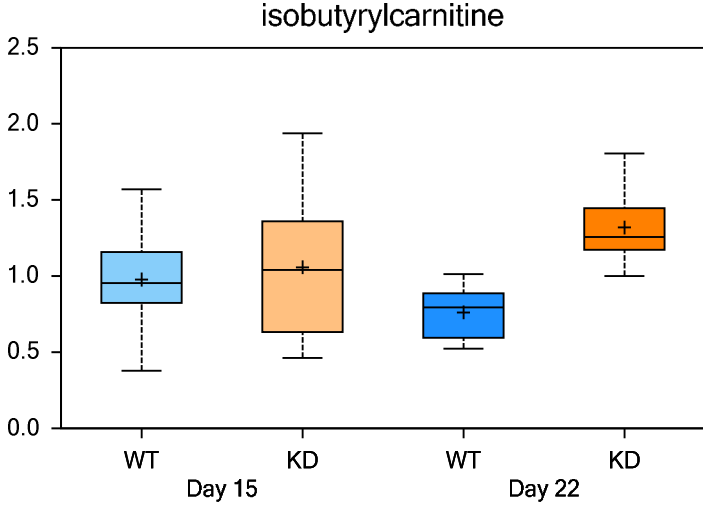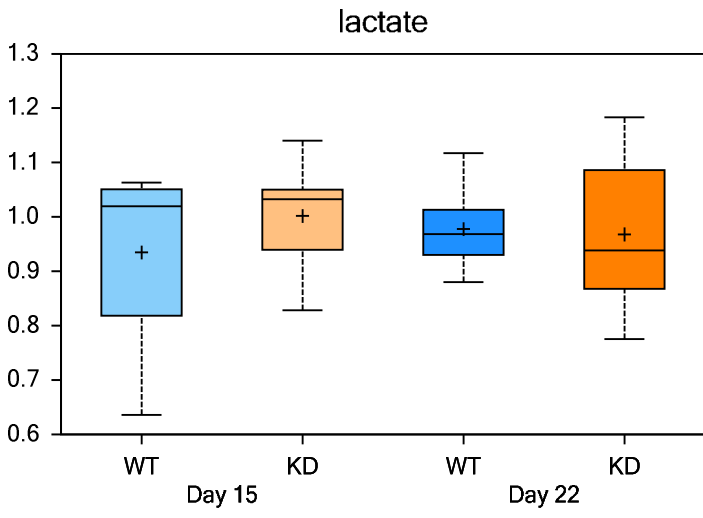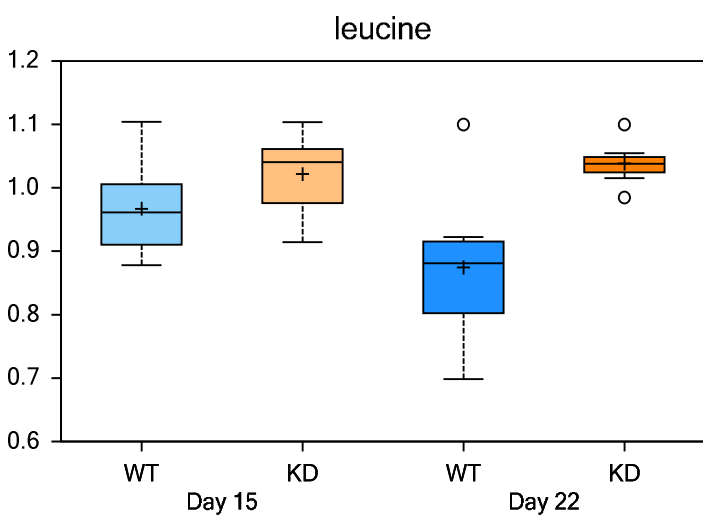



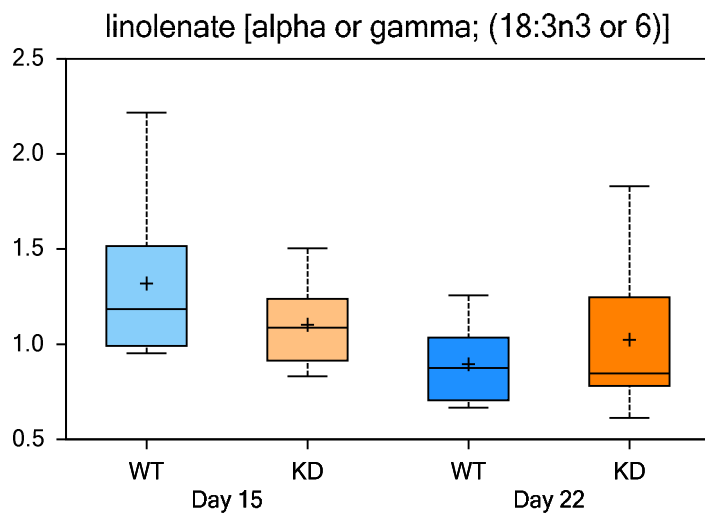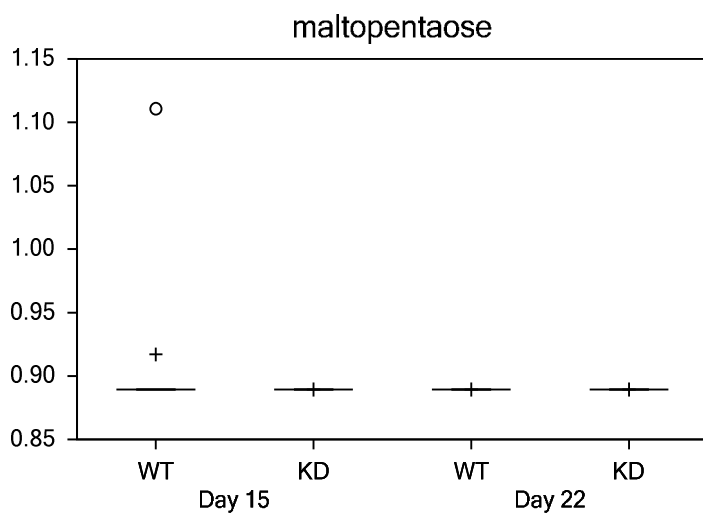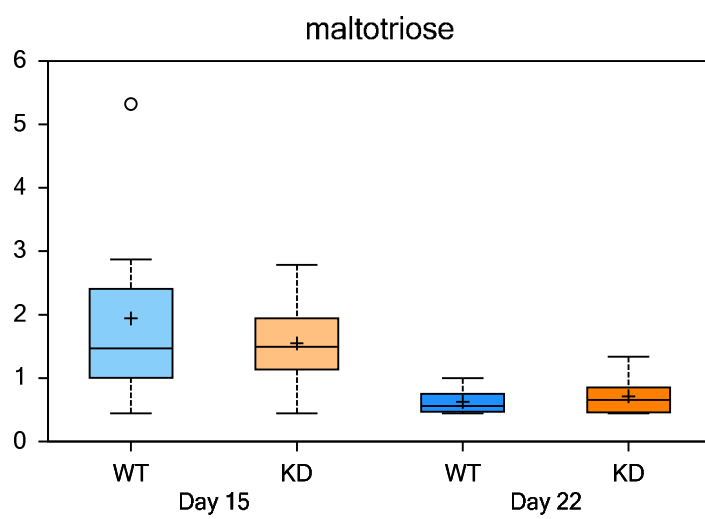

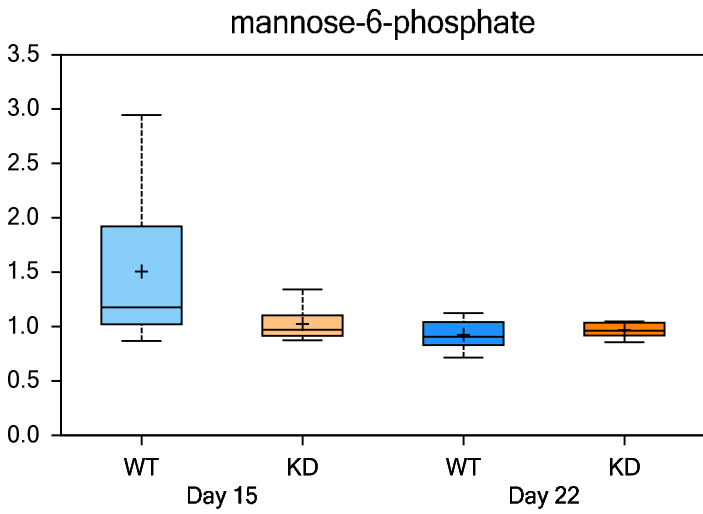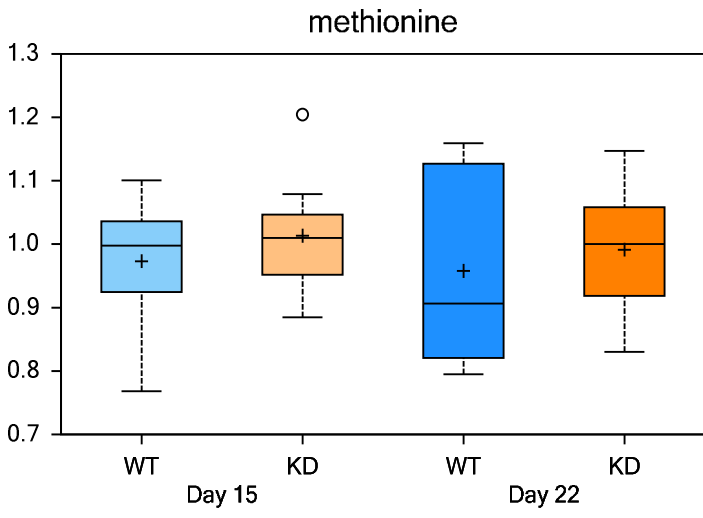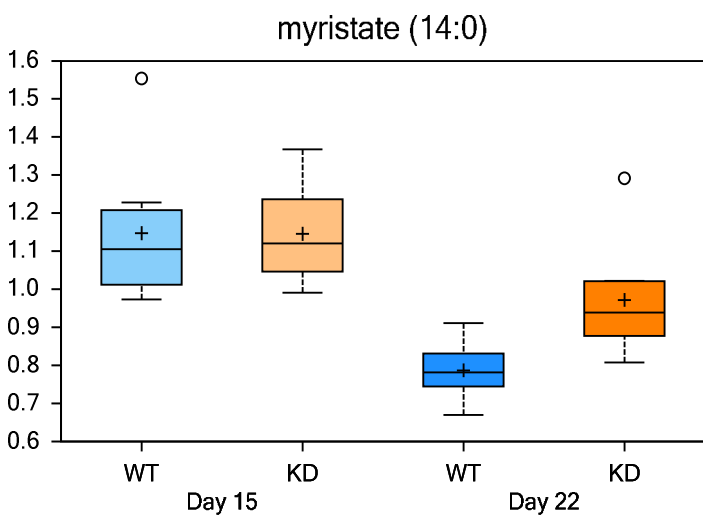

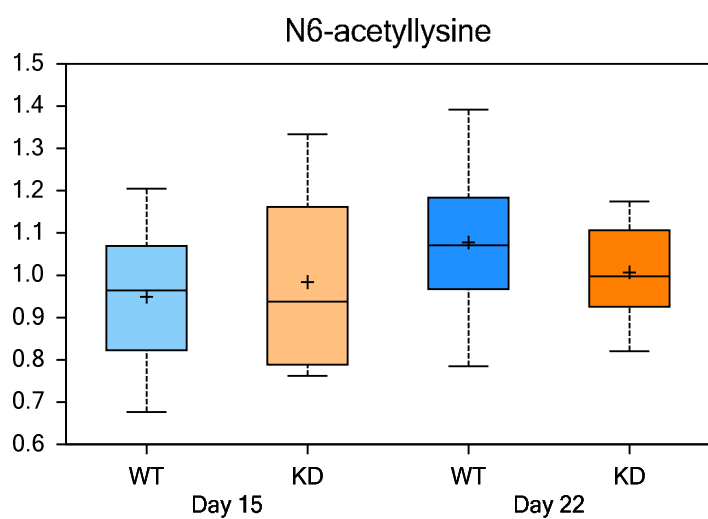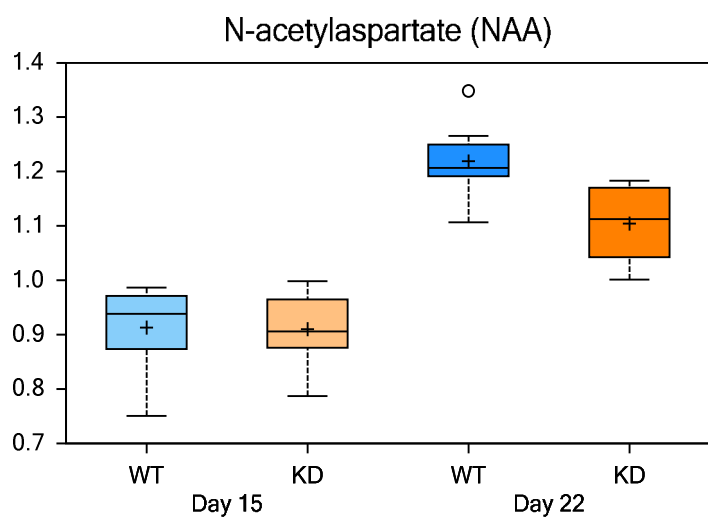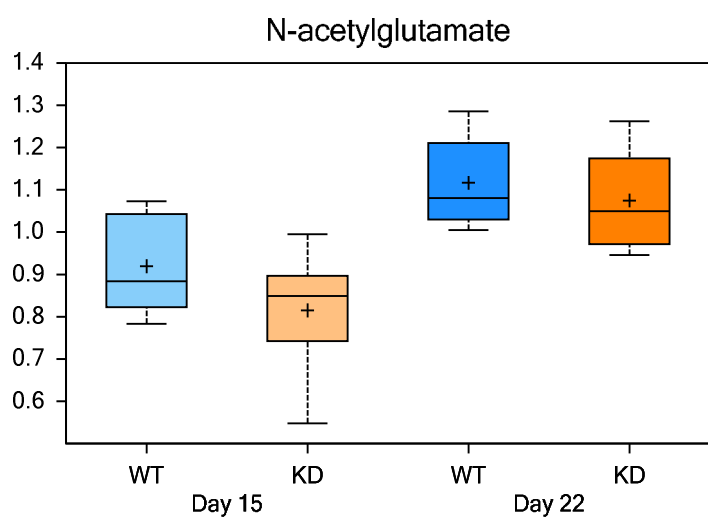

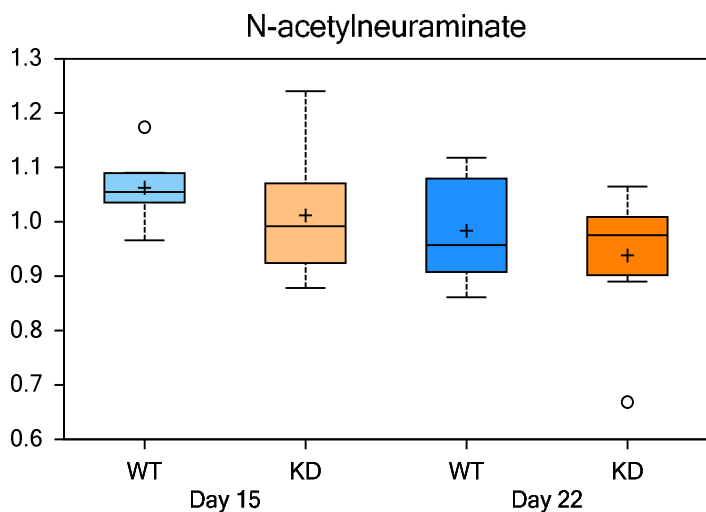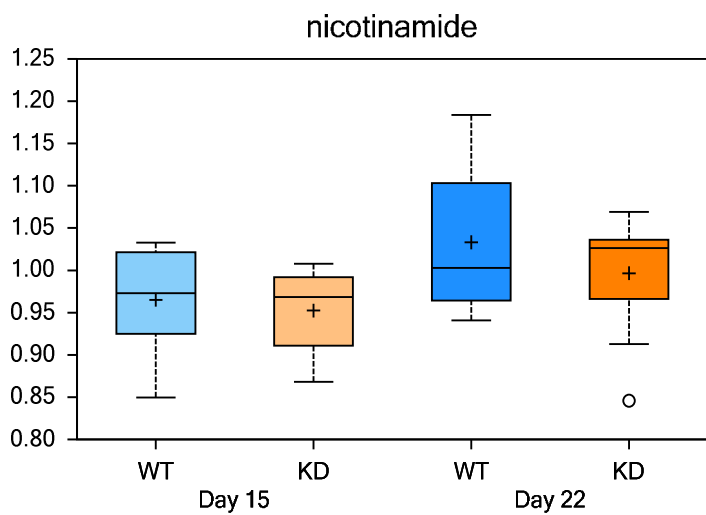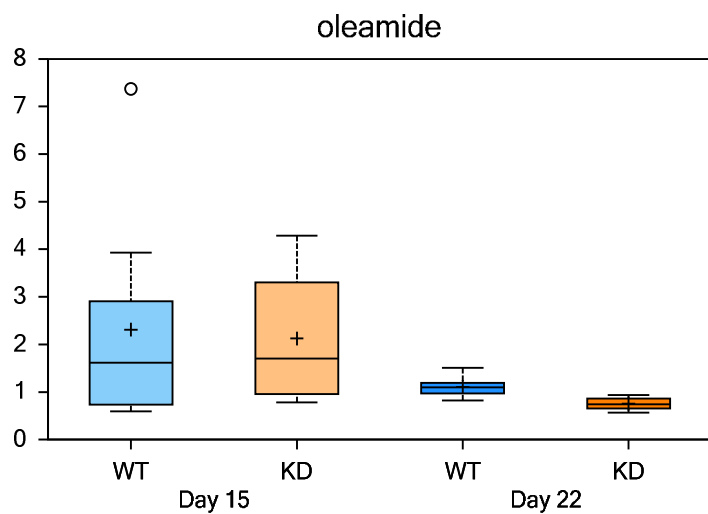

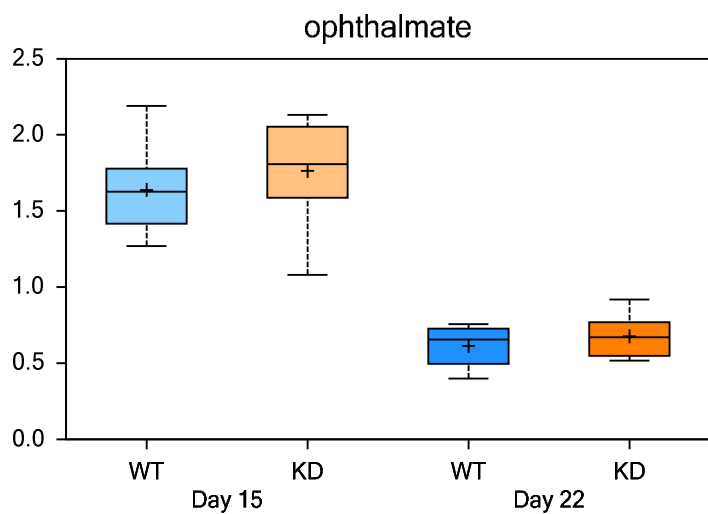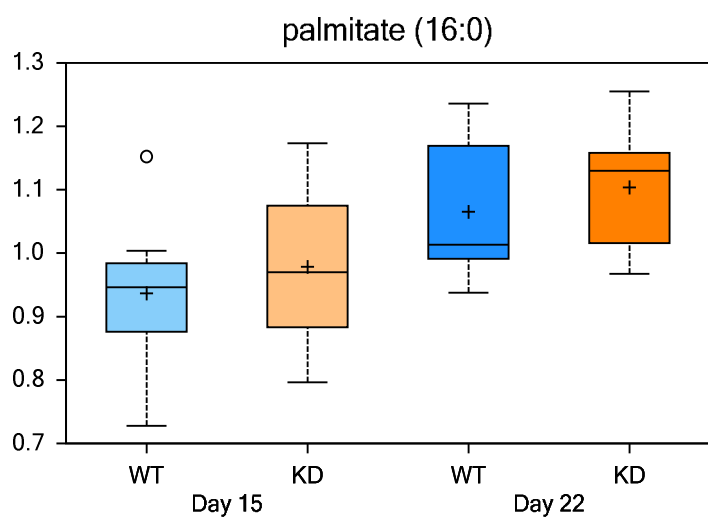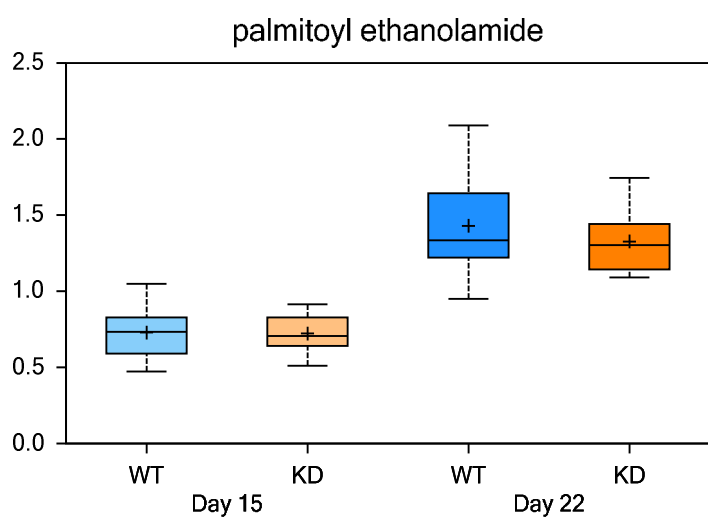

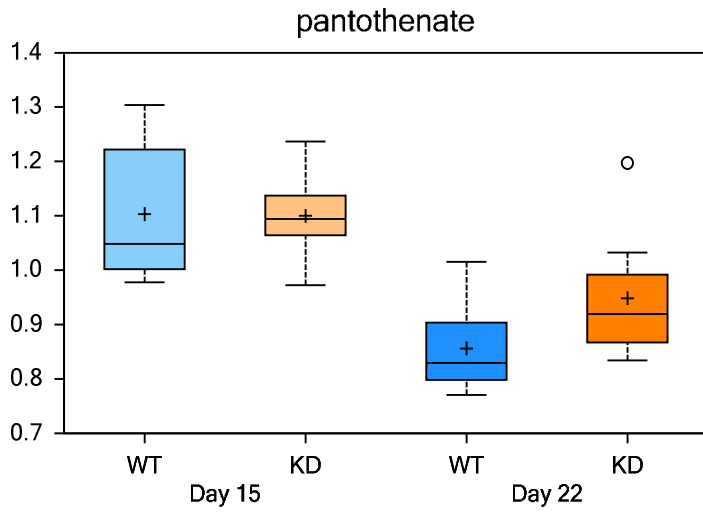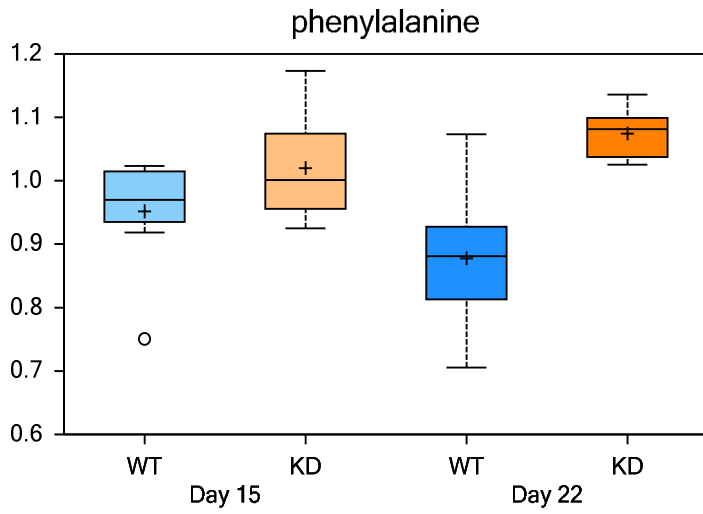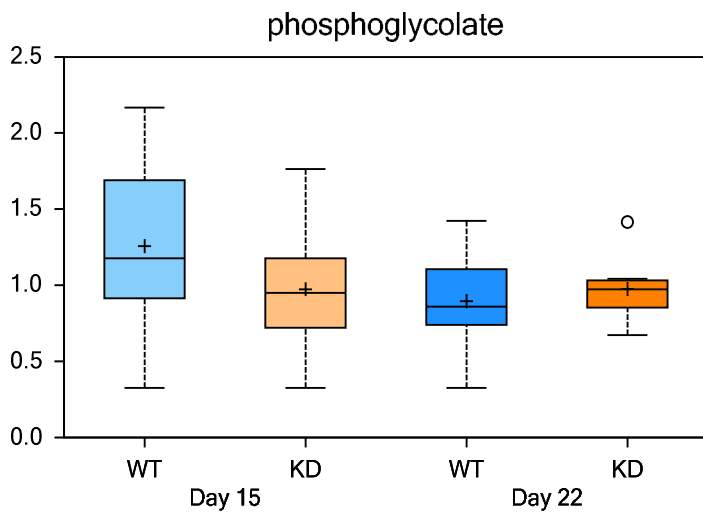

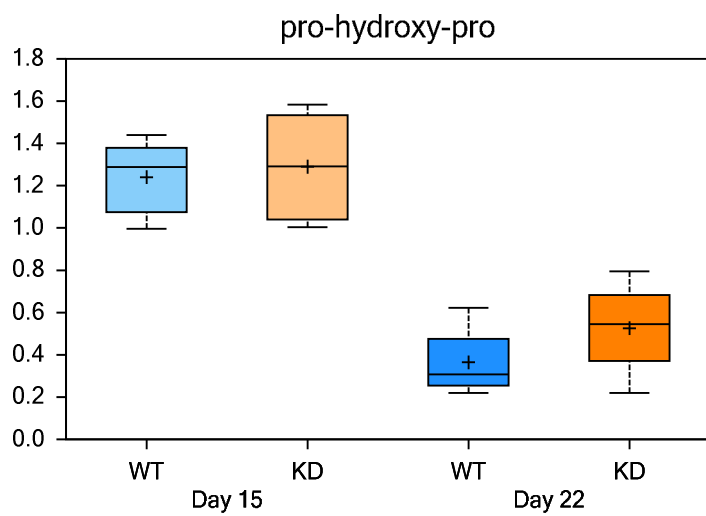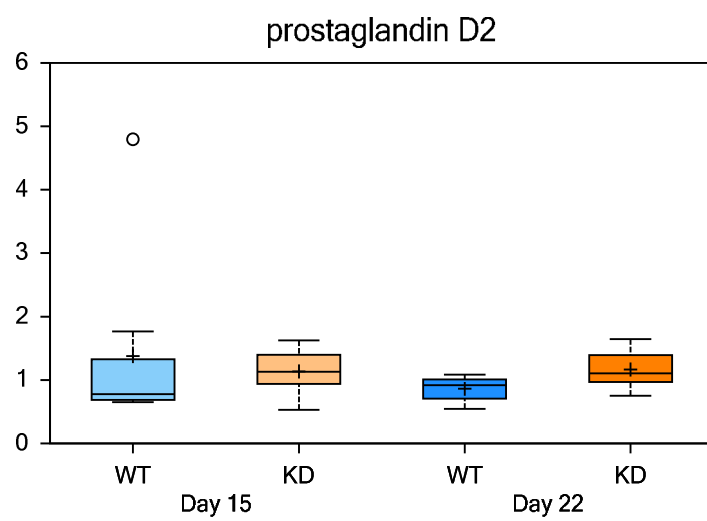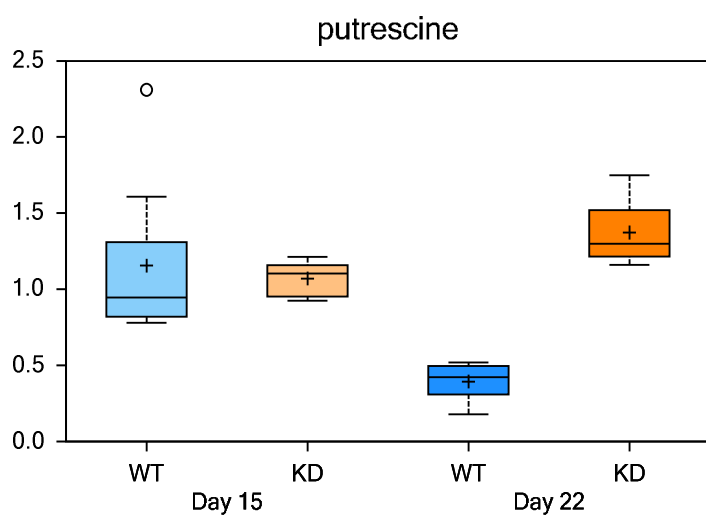

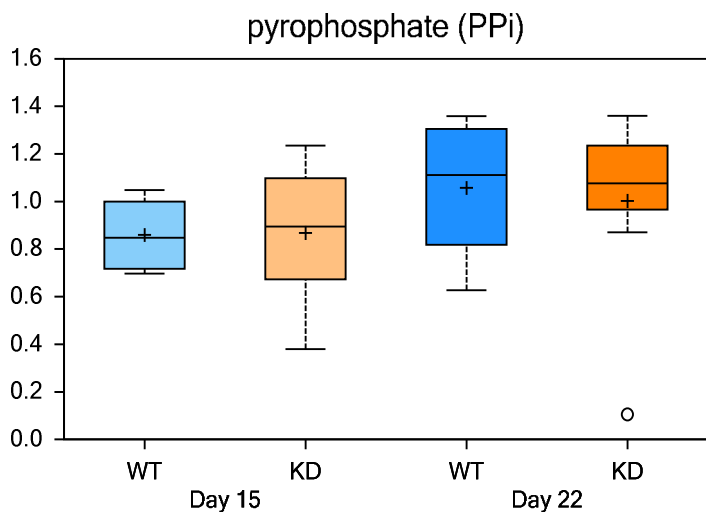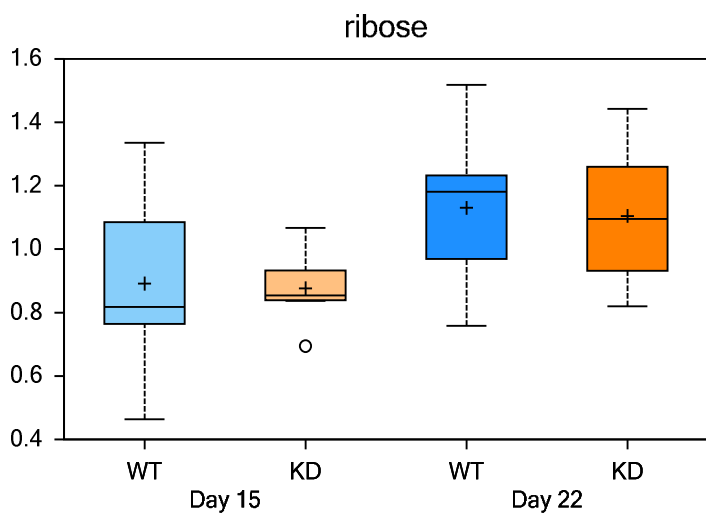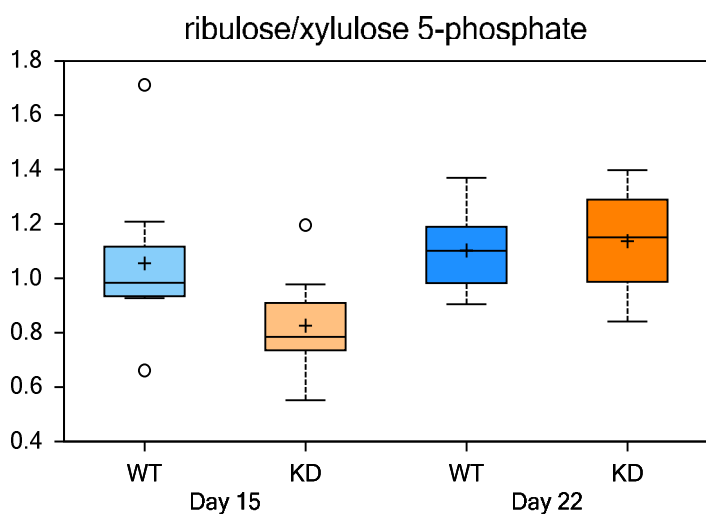



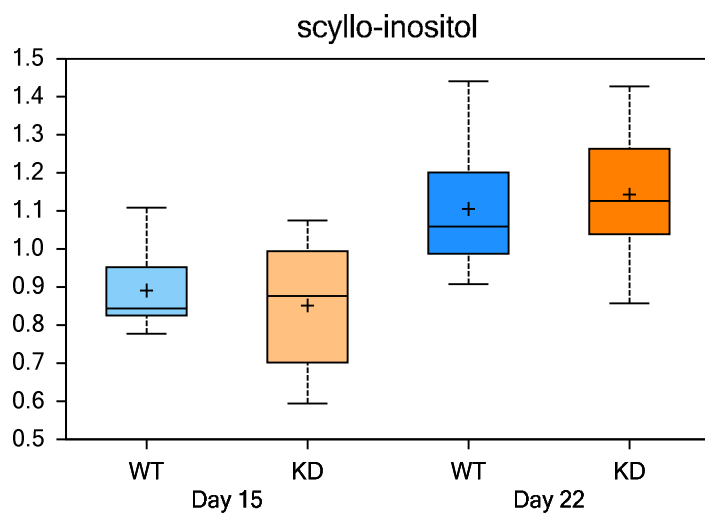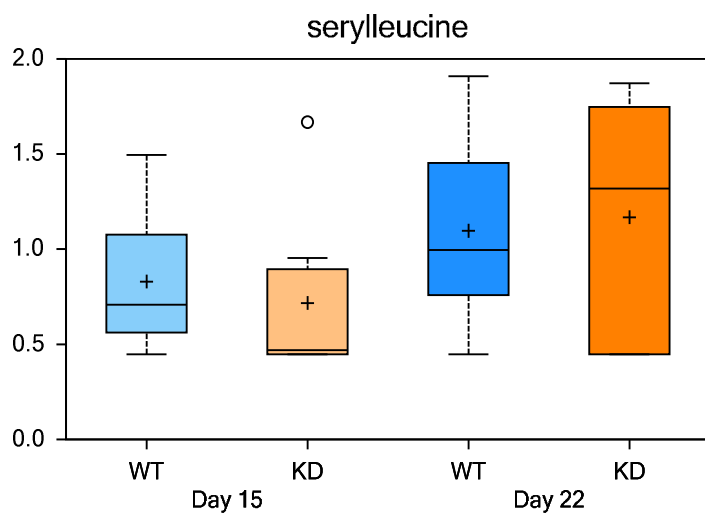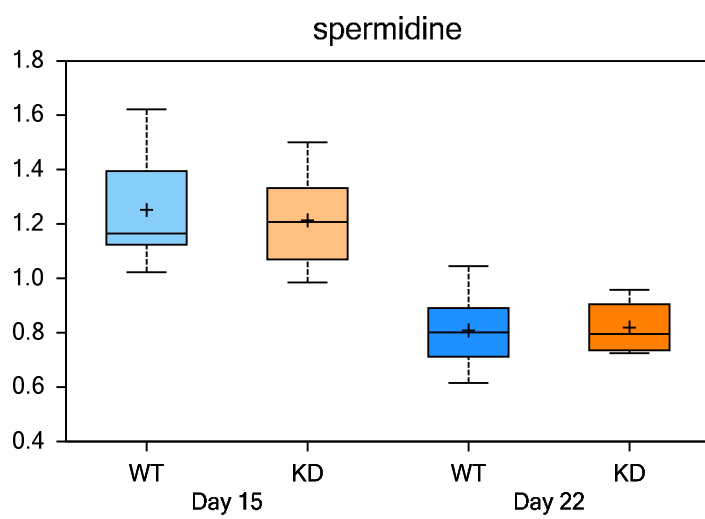

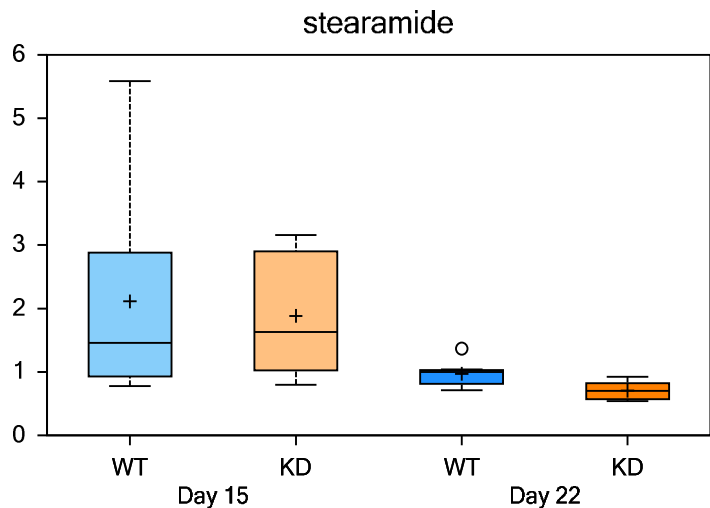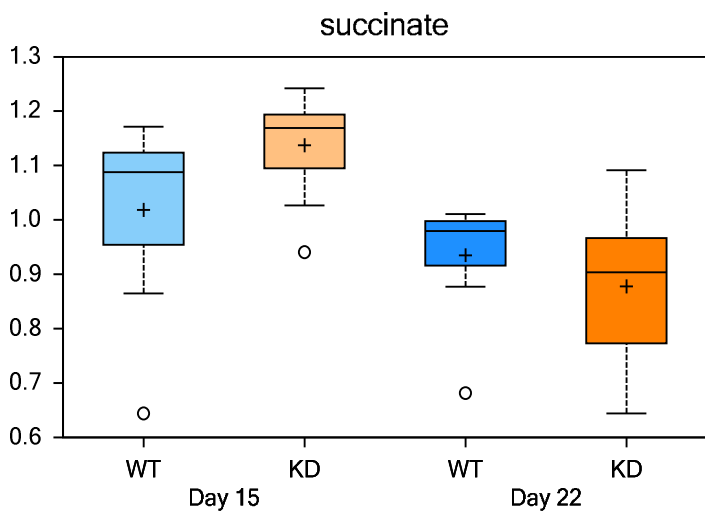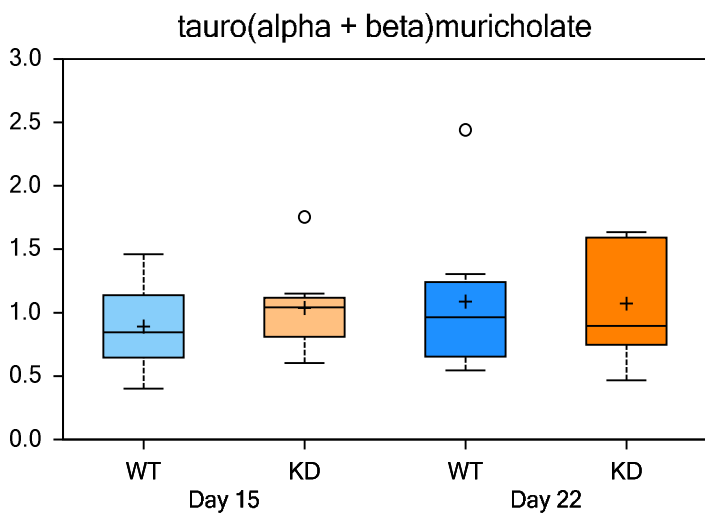

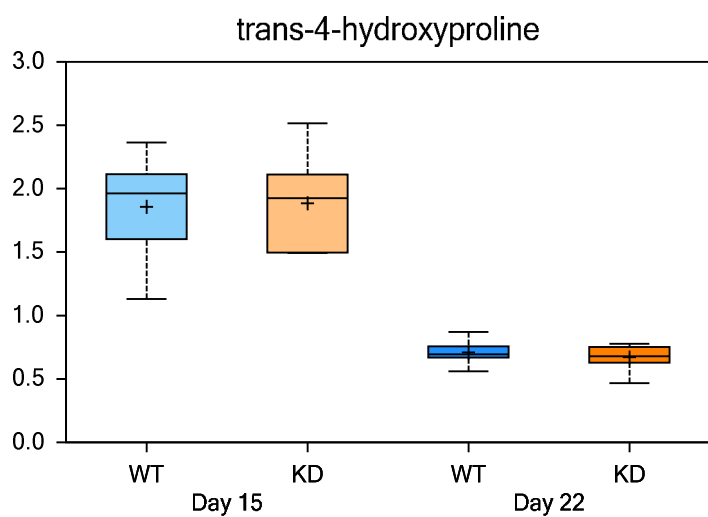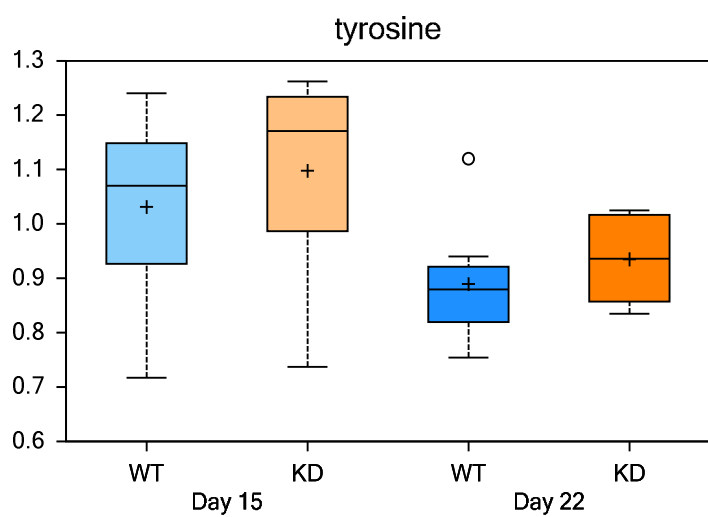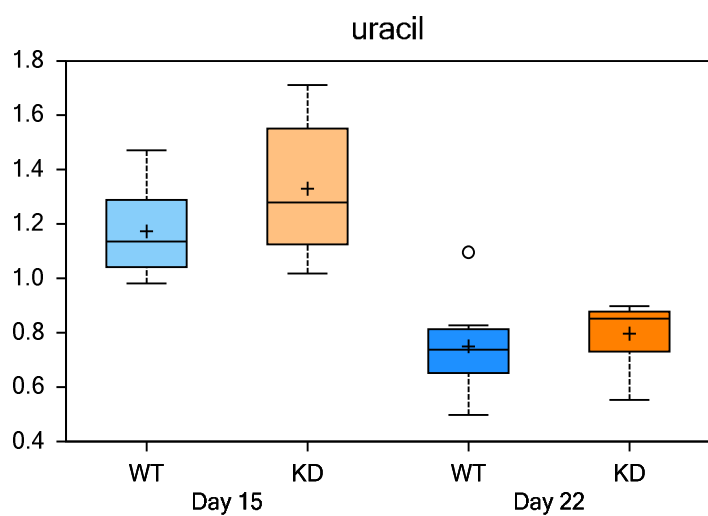

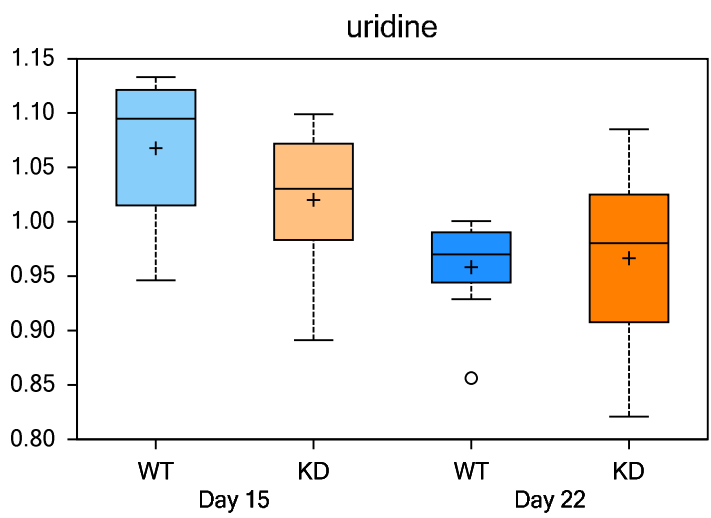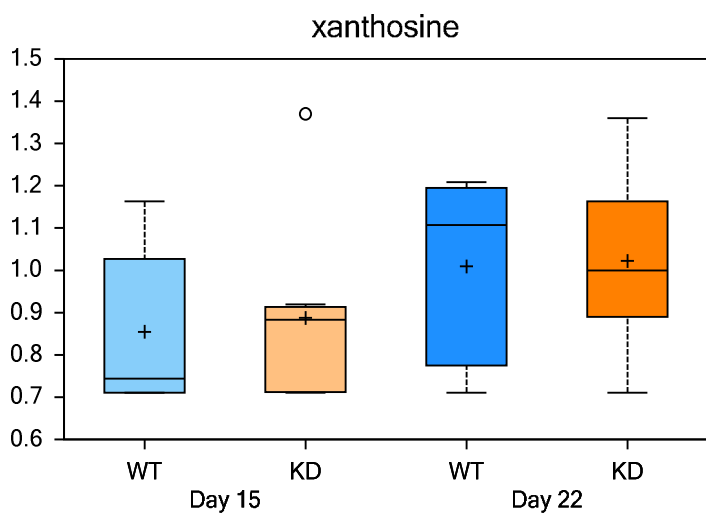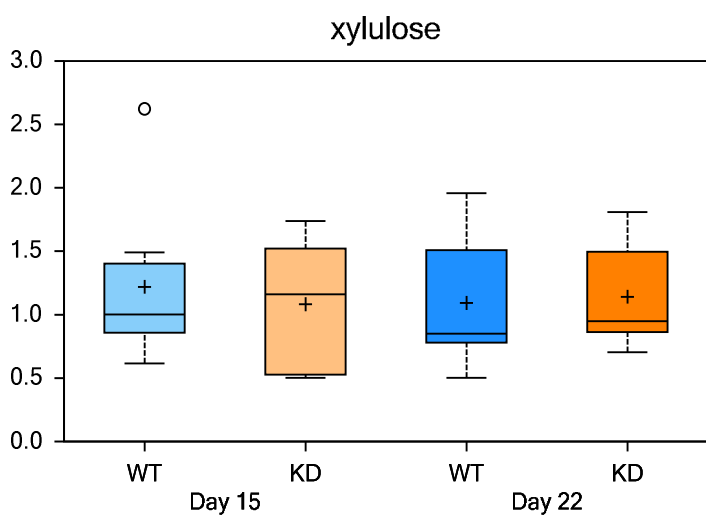

## 1,3-dipalmitoylglycerol

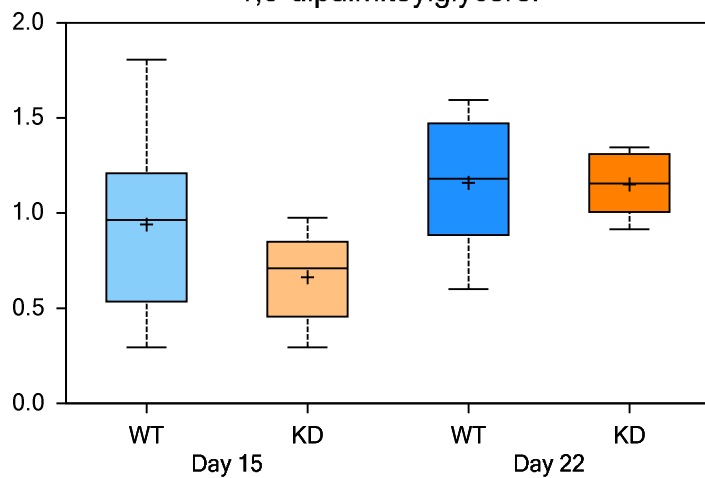

## 10-heptadecenoate (17:1n7)

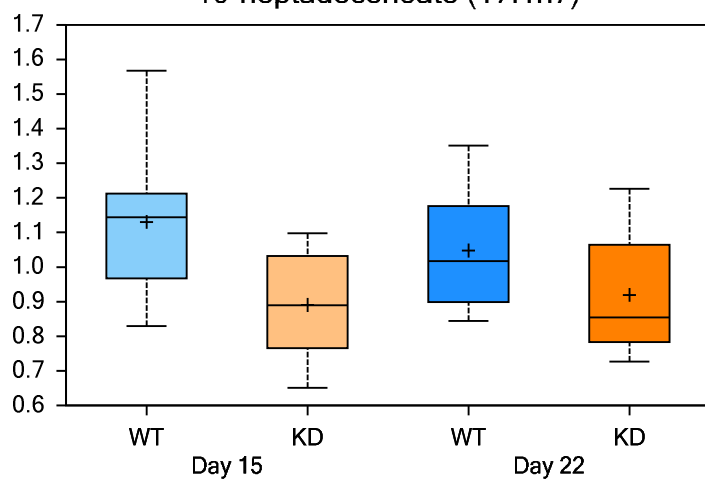

## 15-HETE

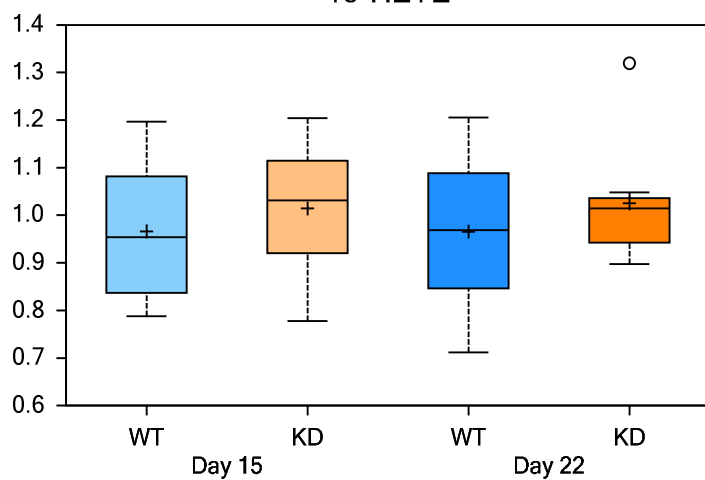

## Box Plot L

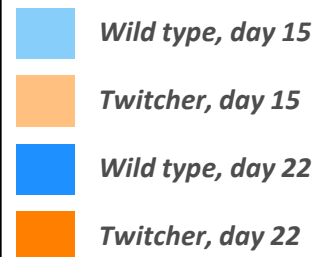

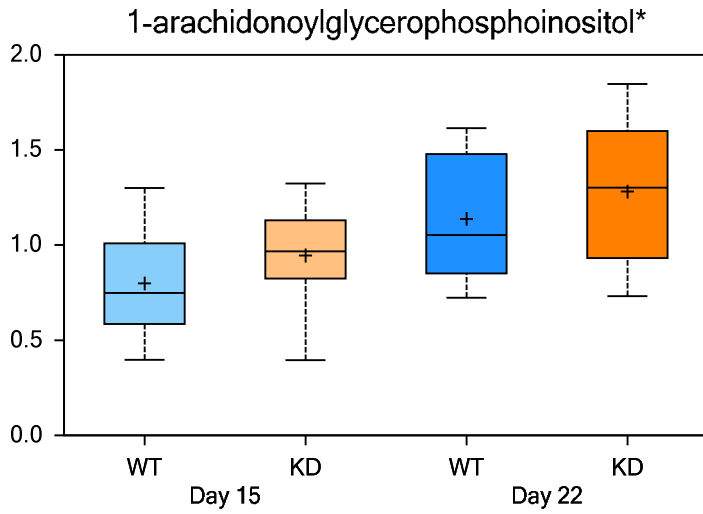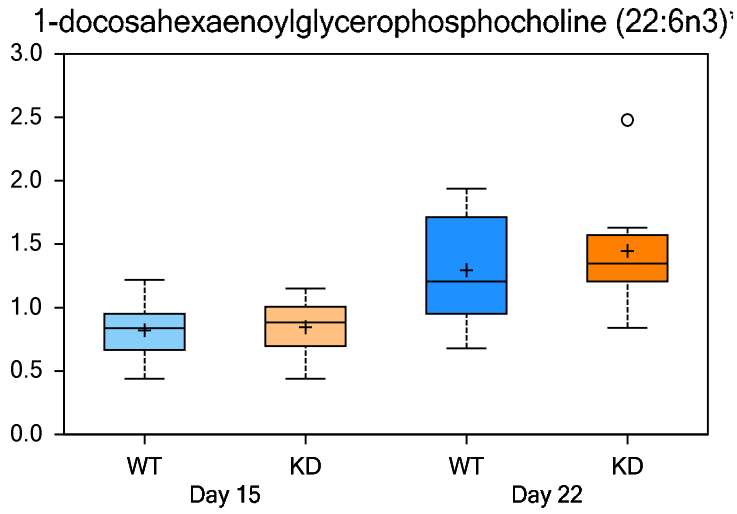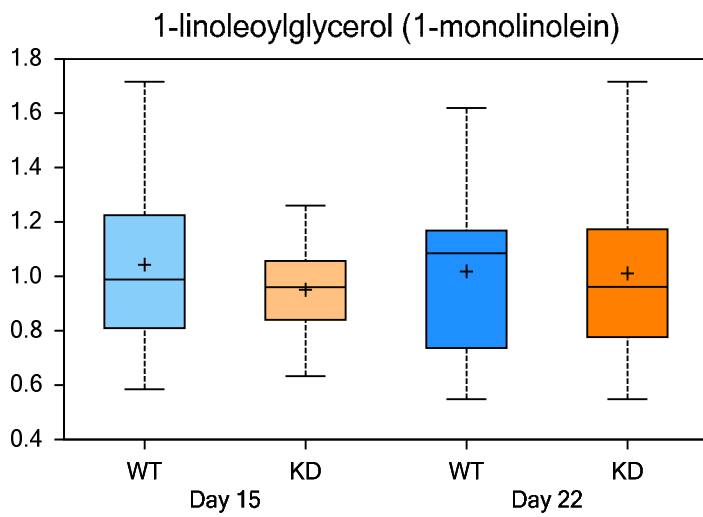

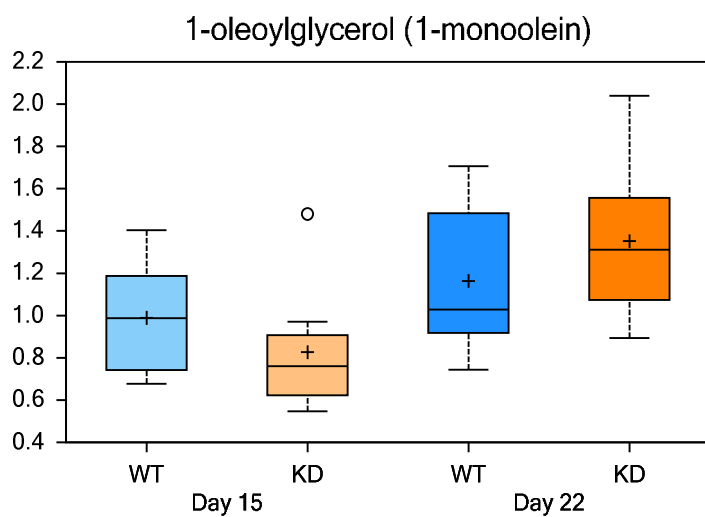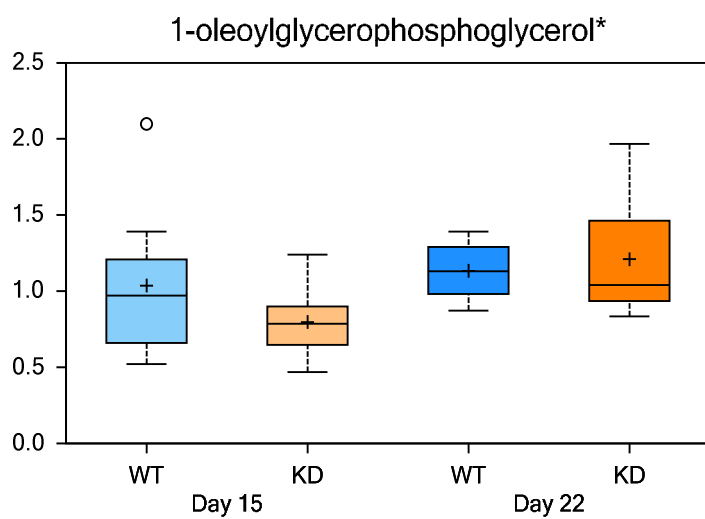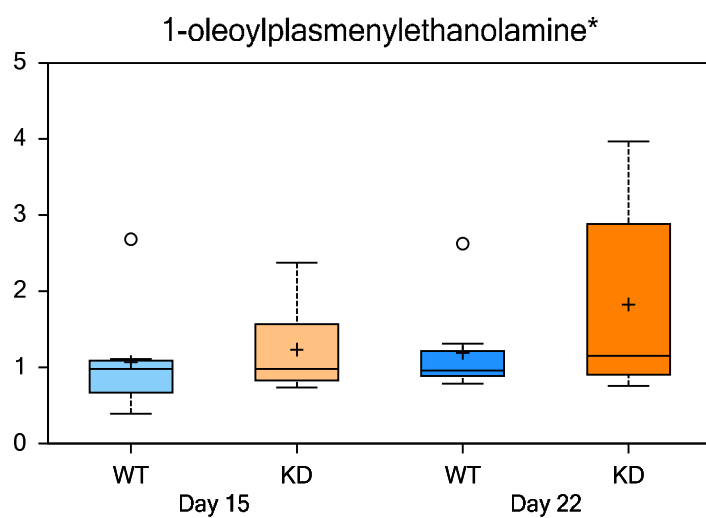

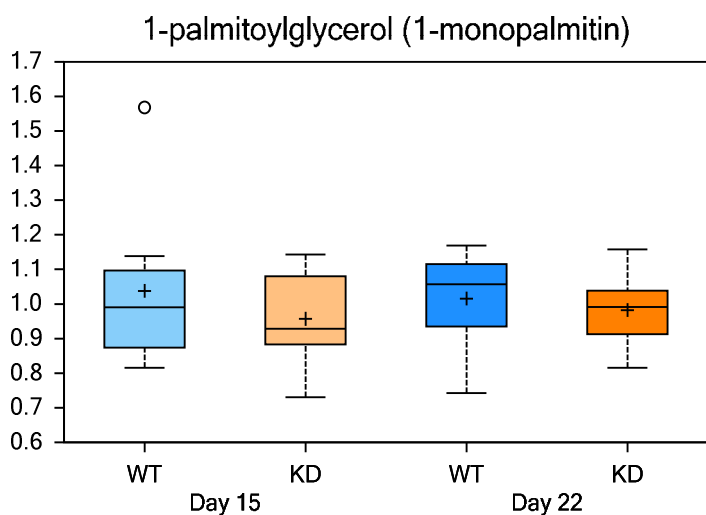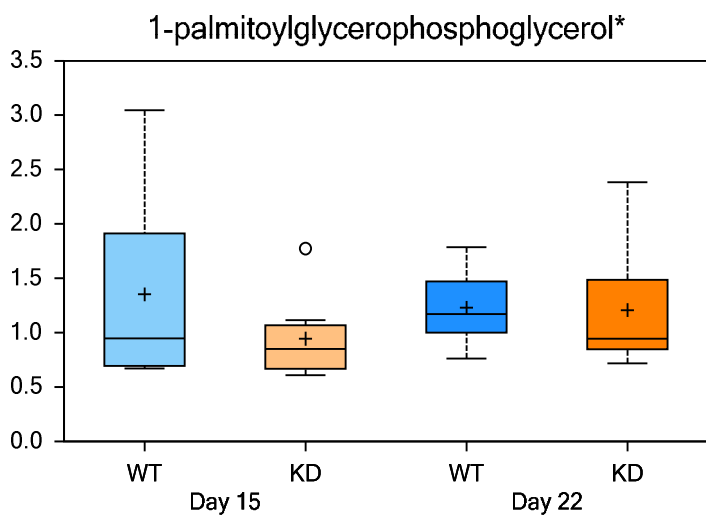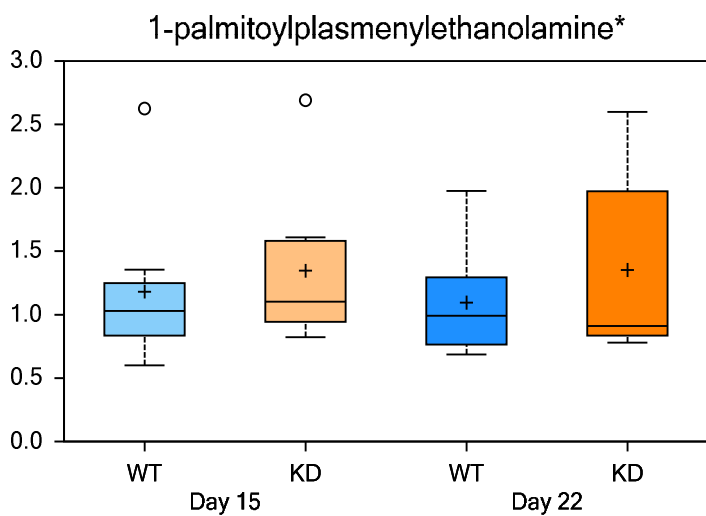



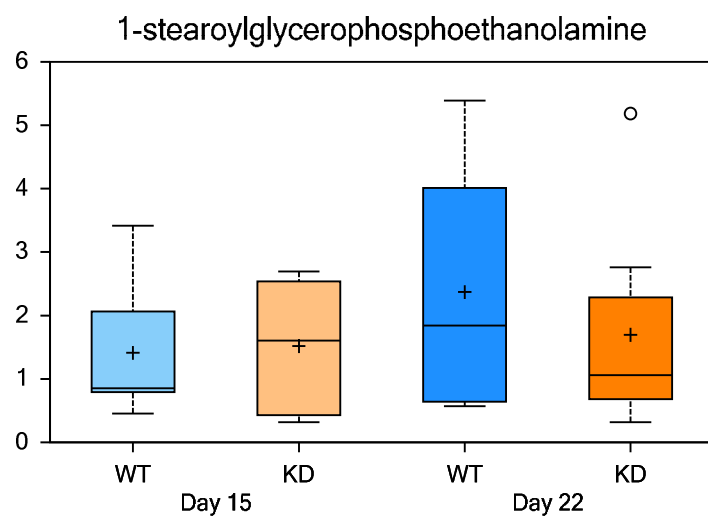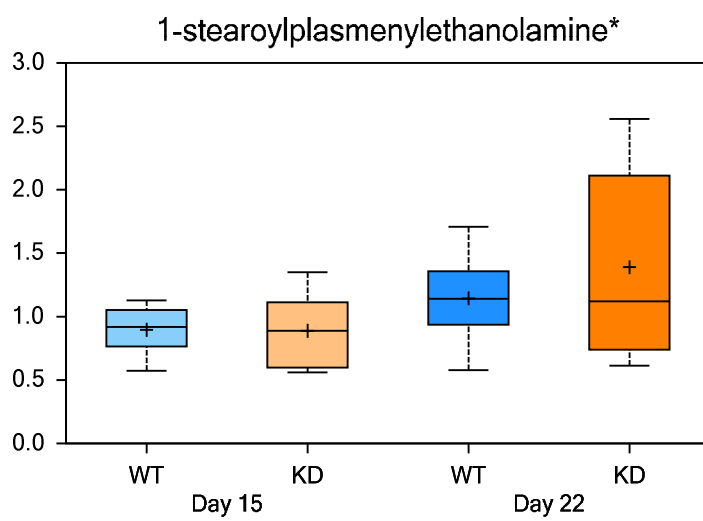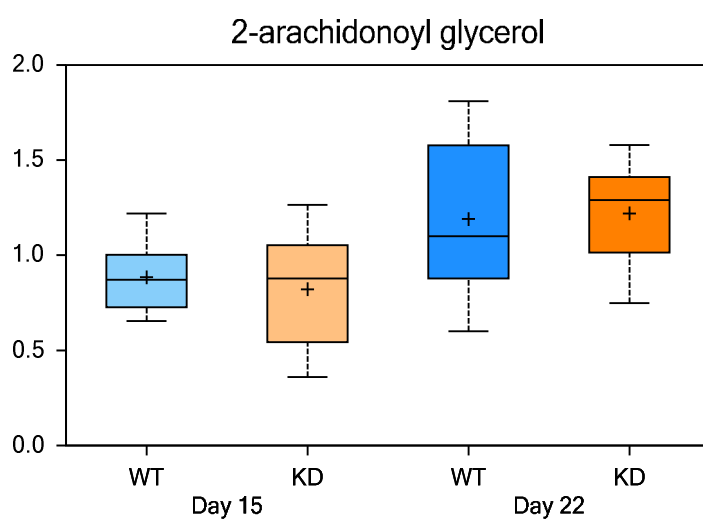

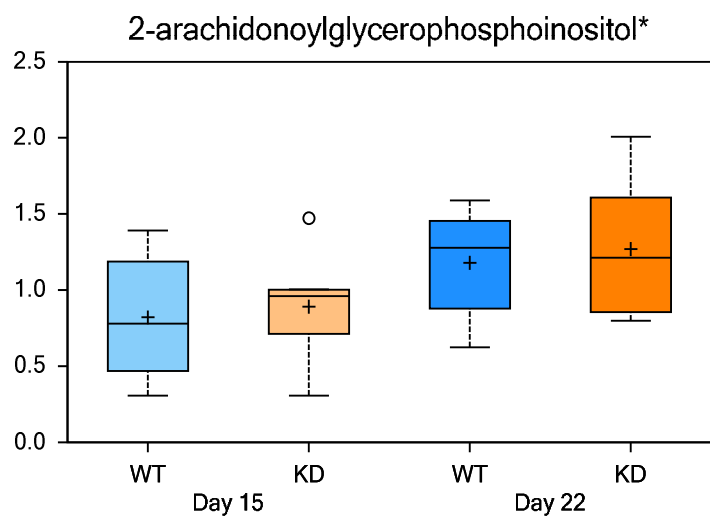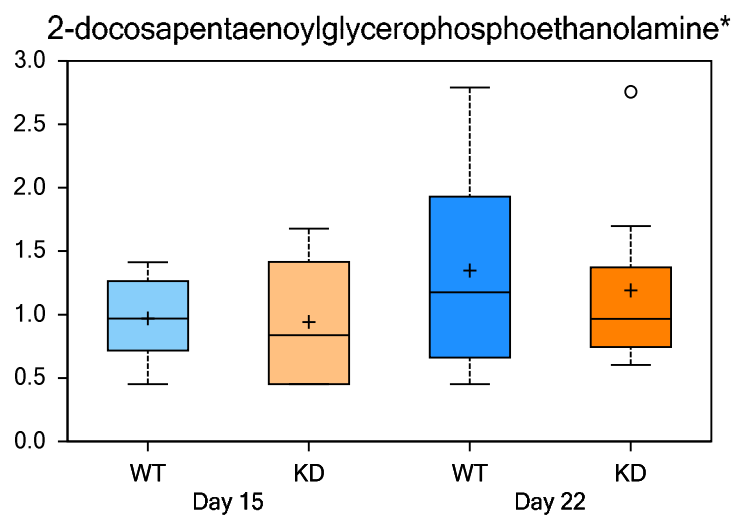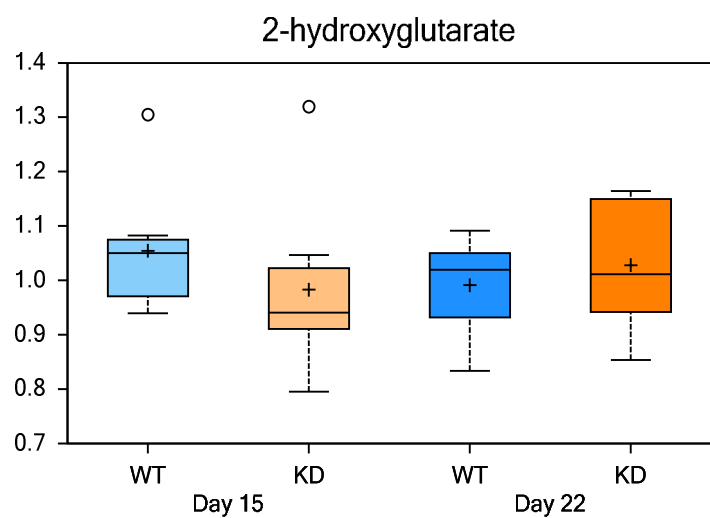

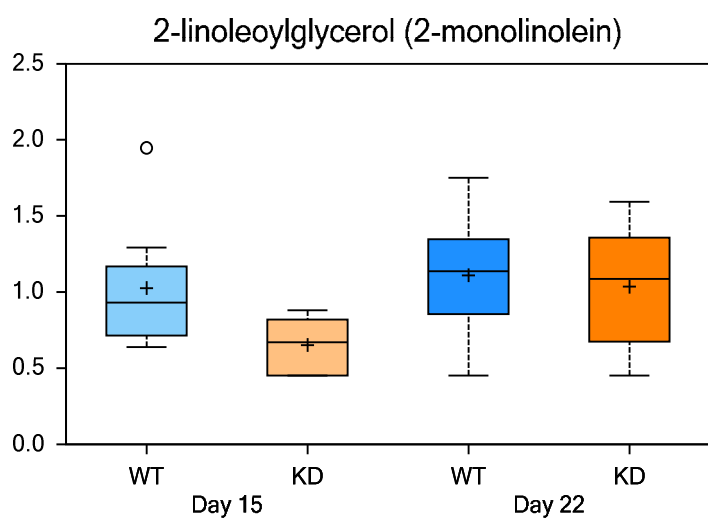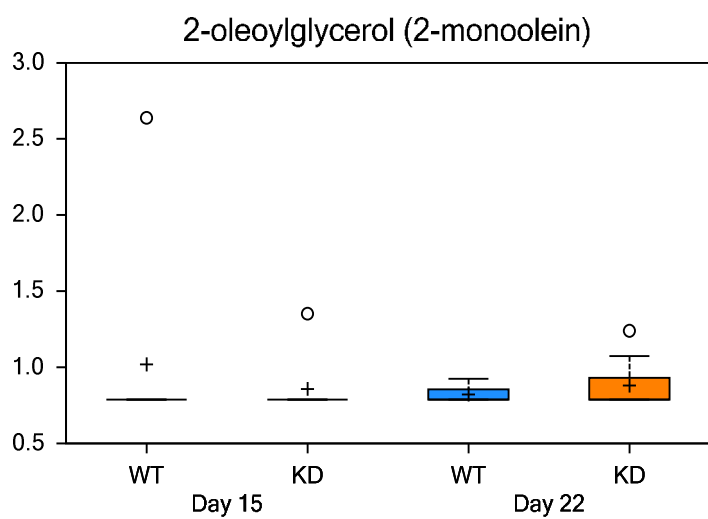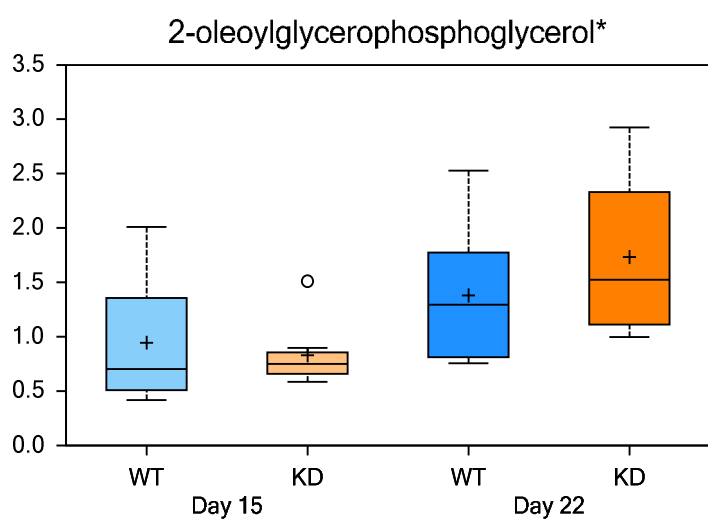

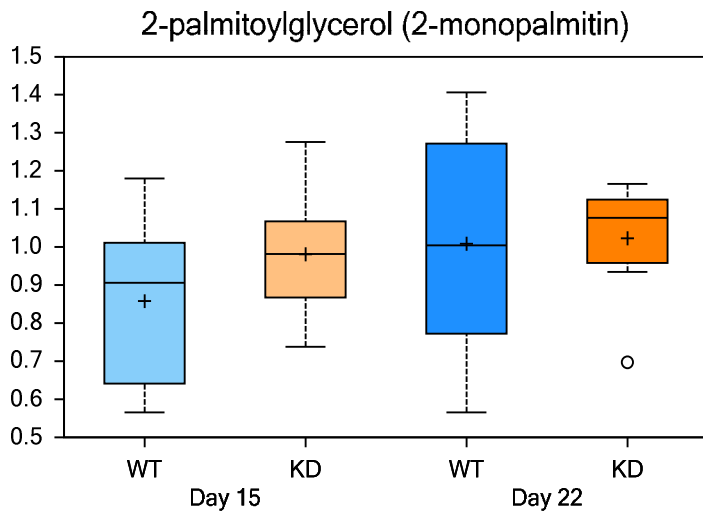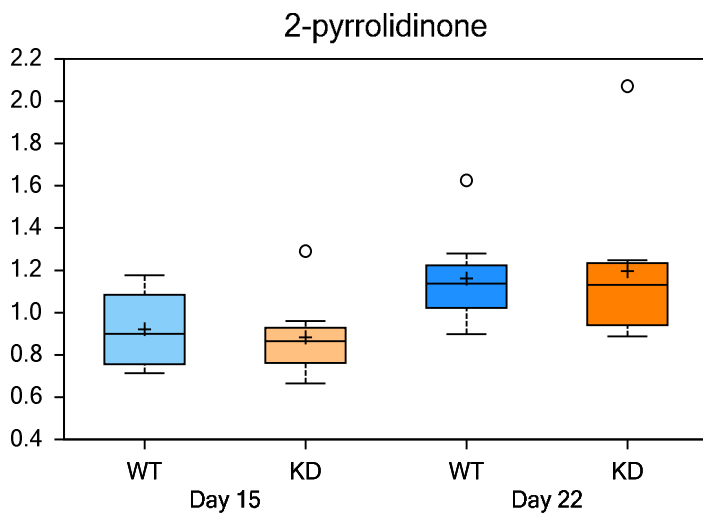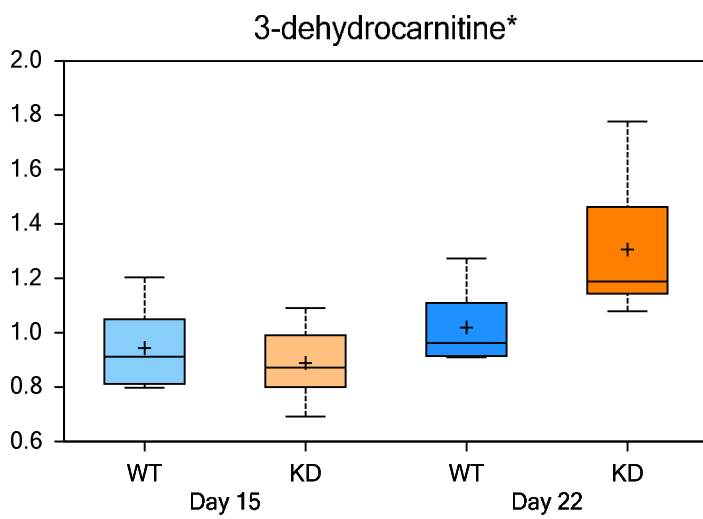

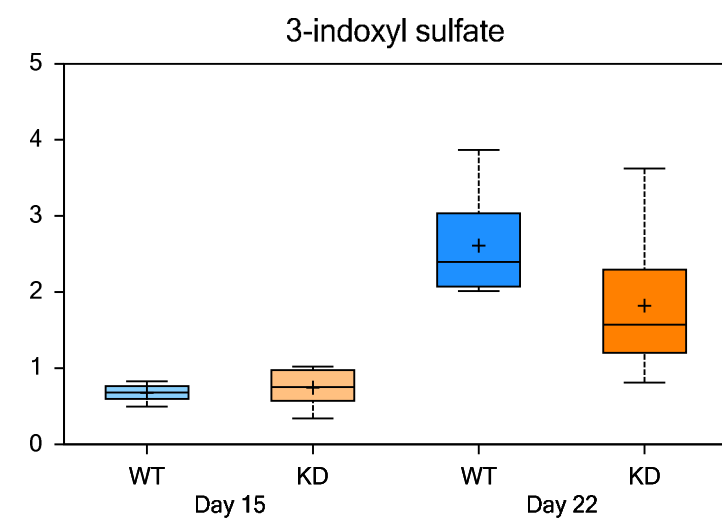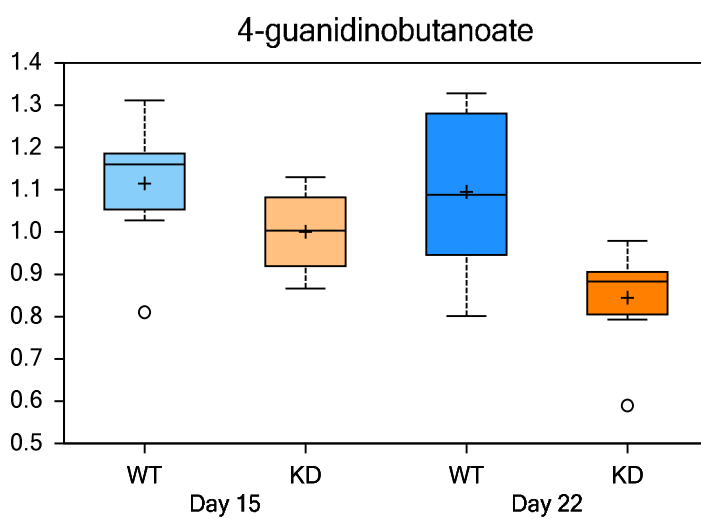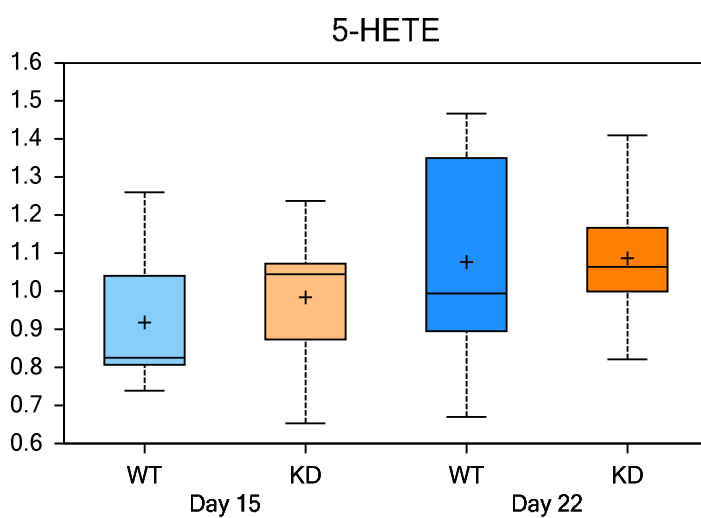

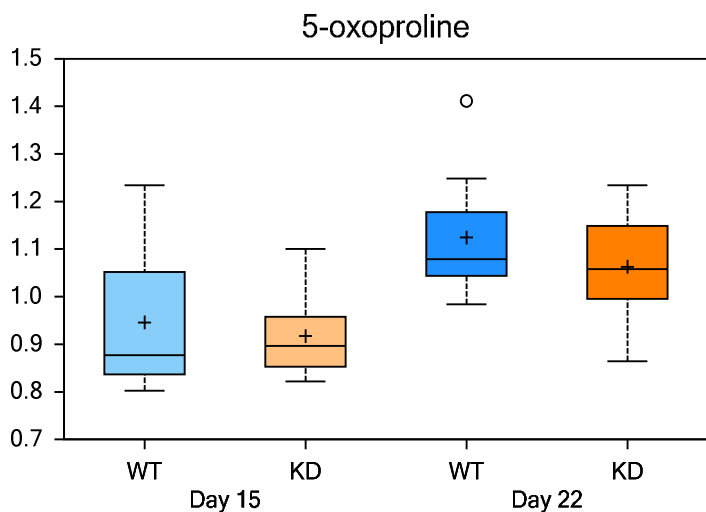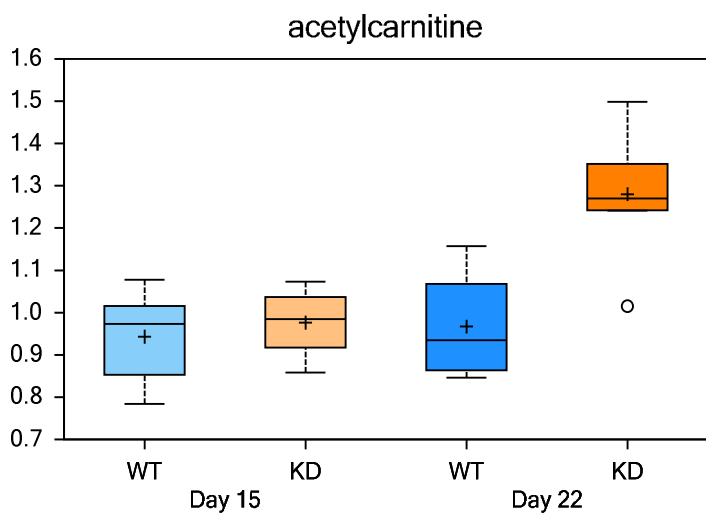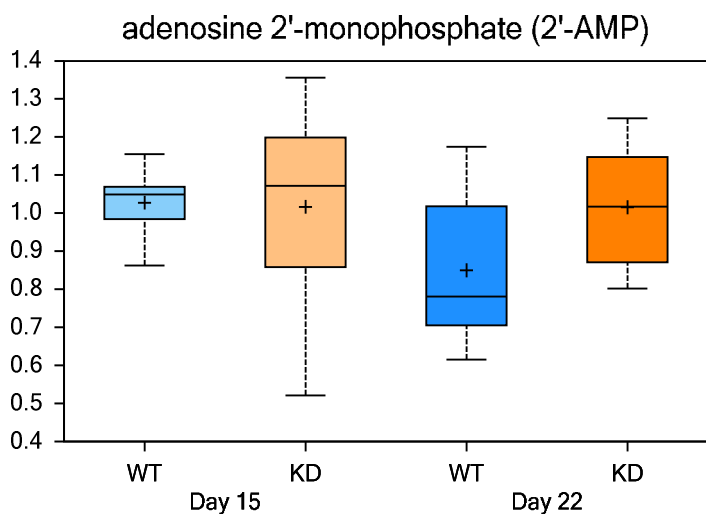

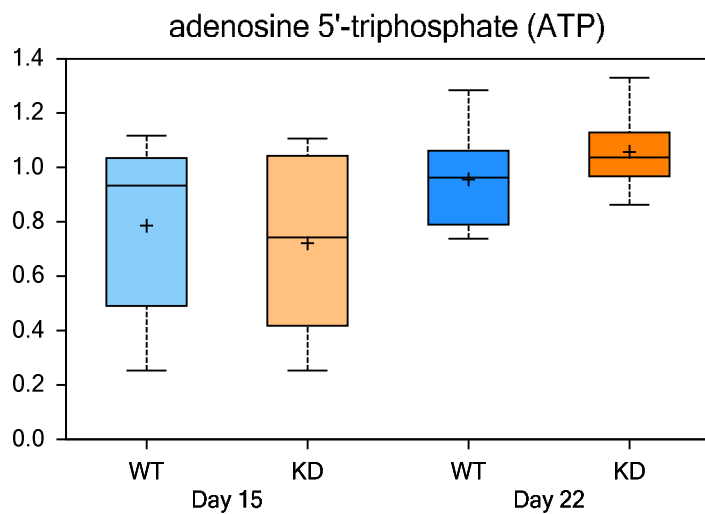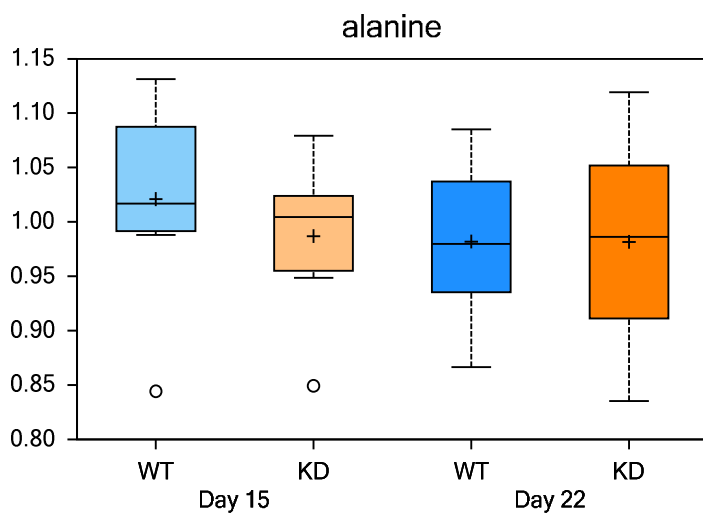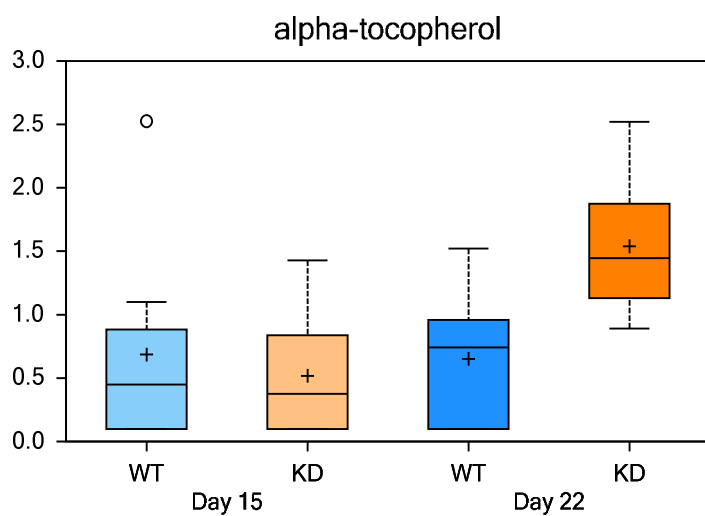

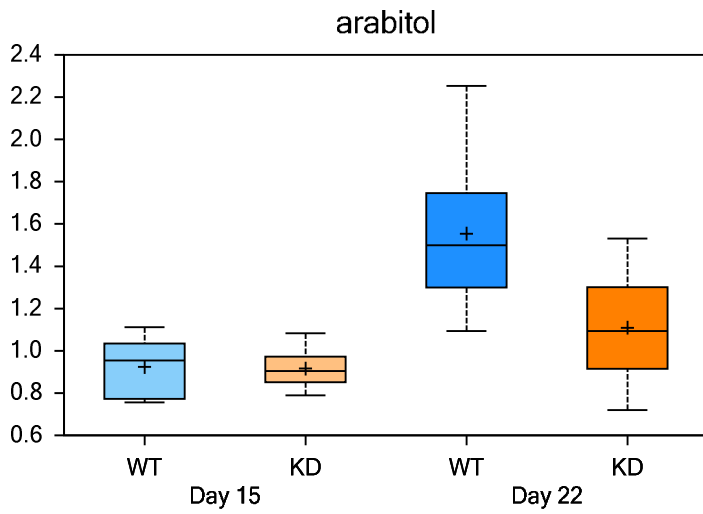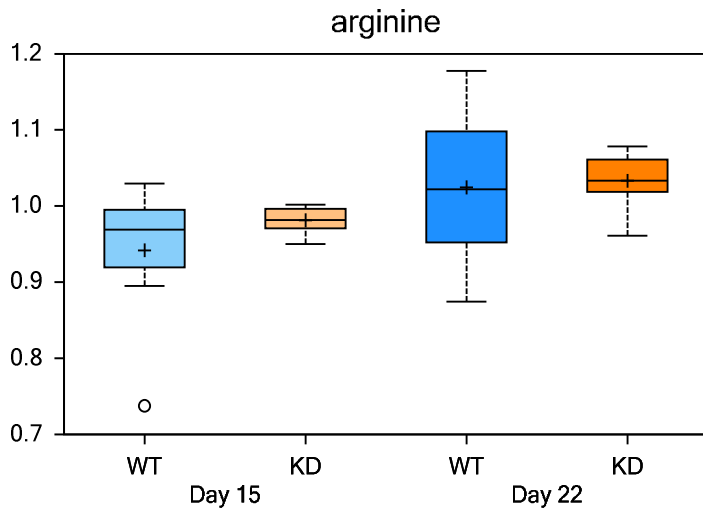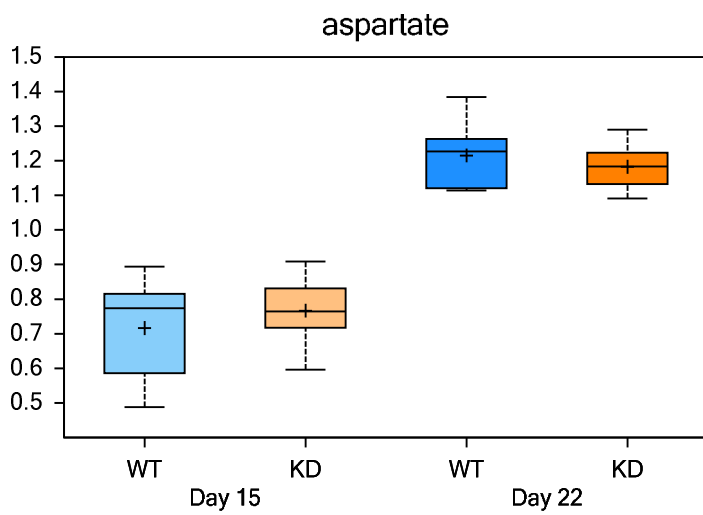



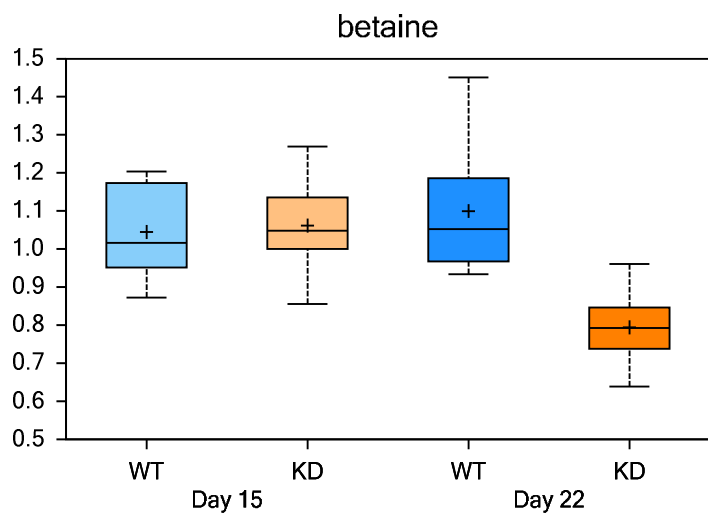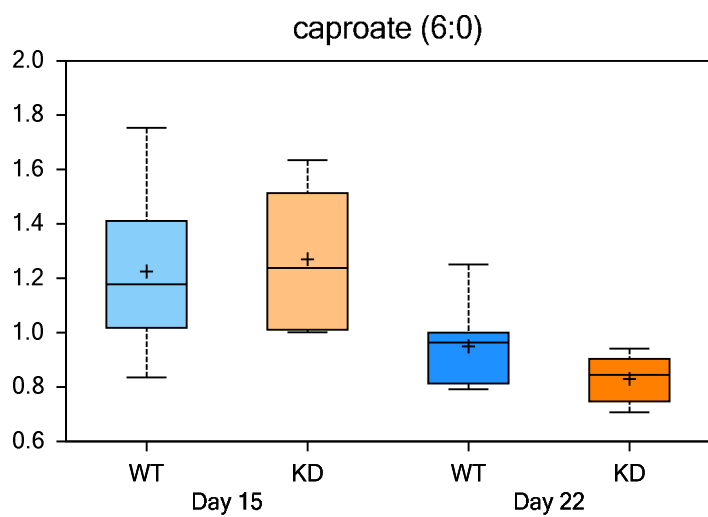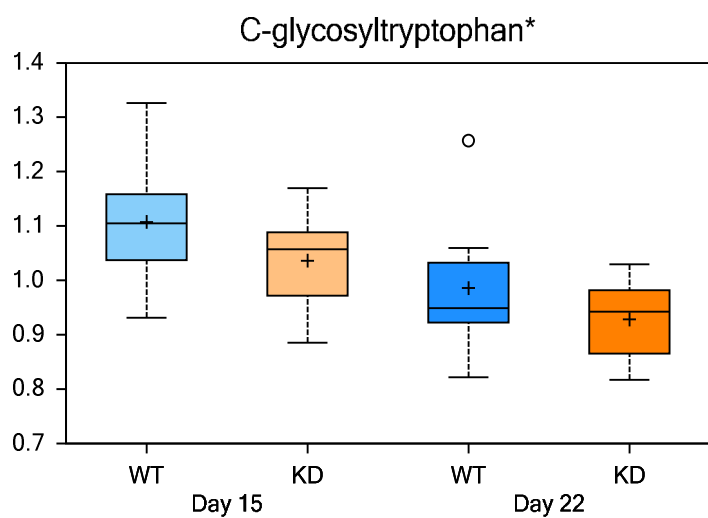

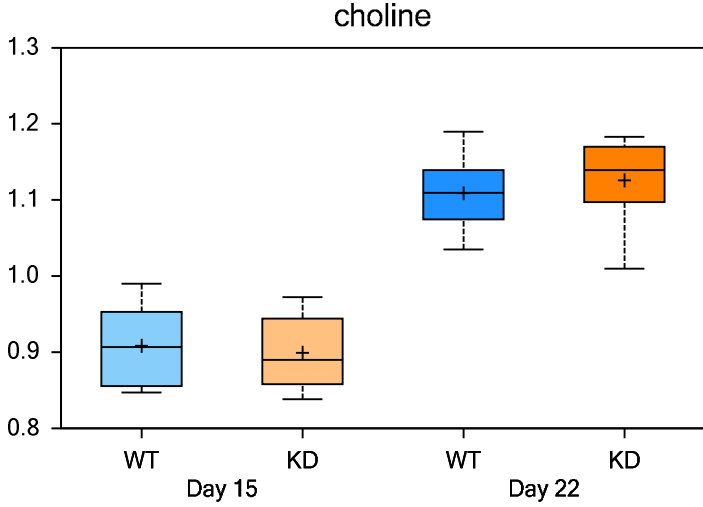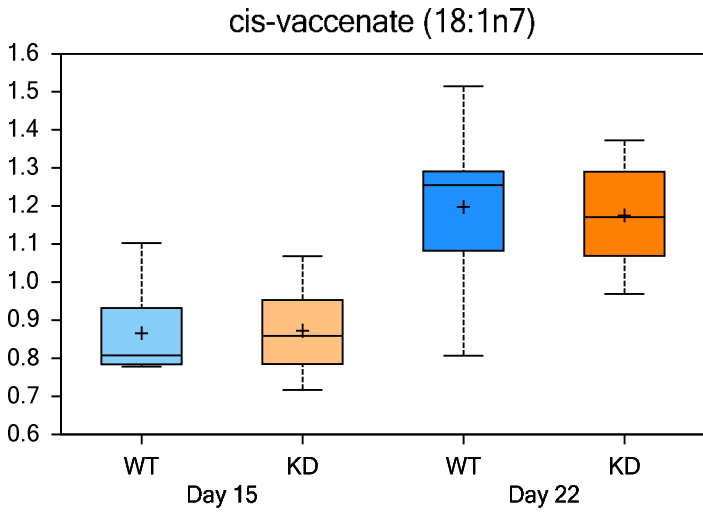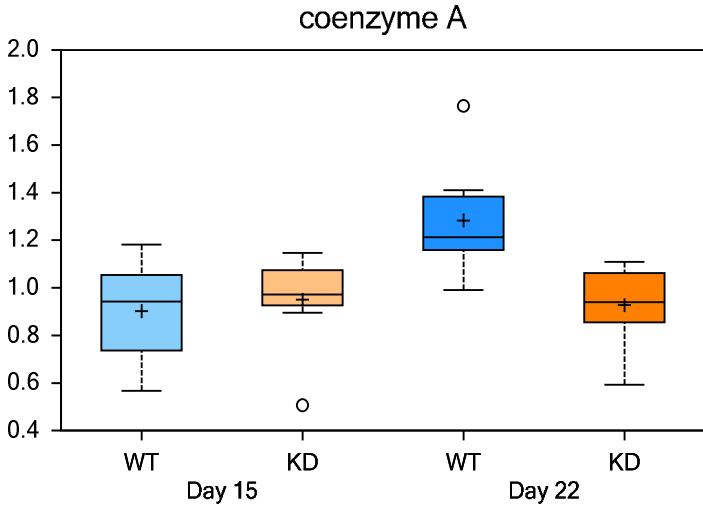

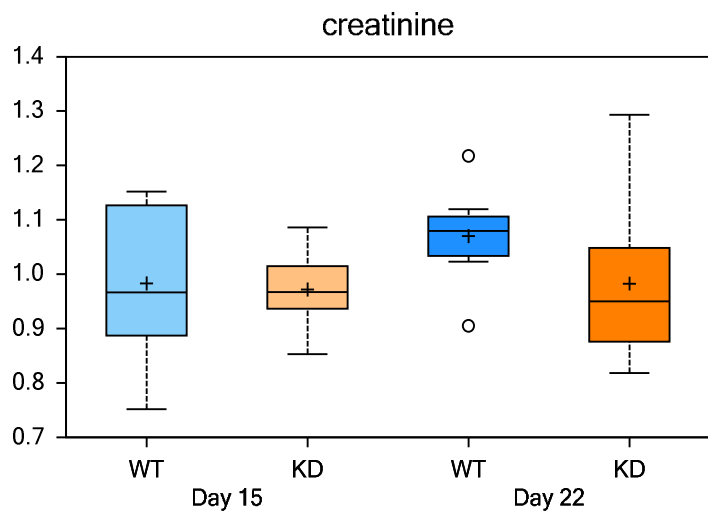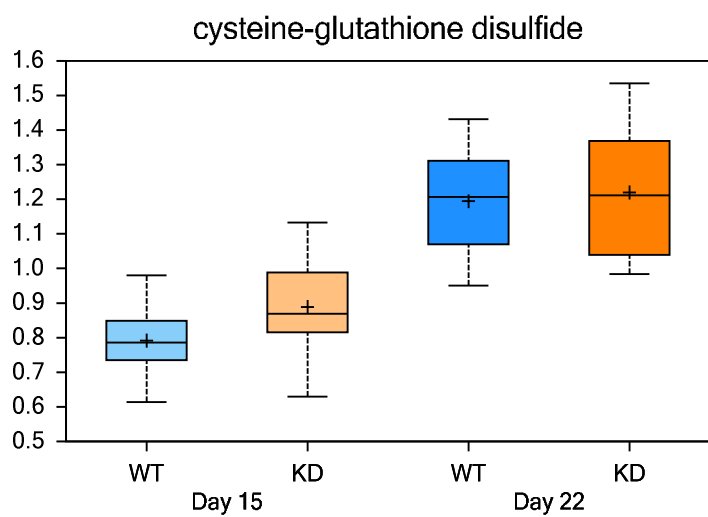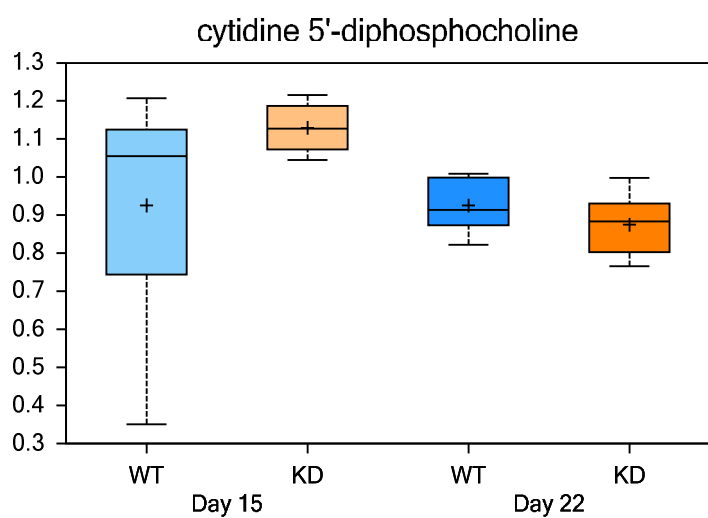

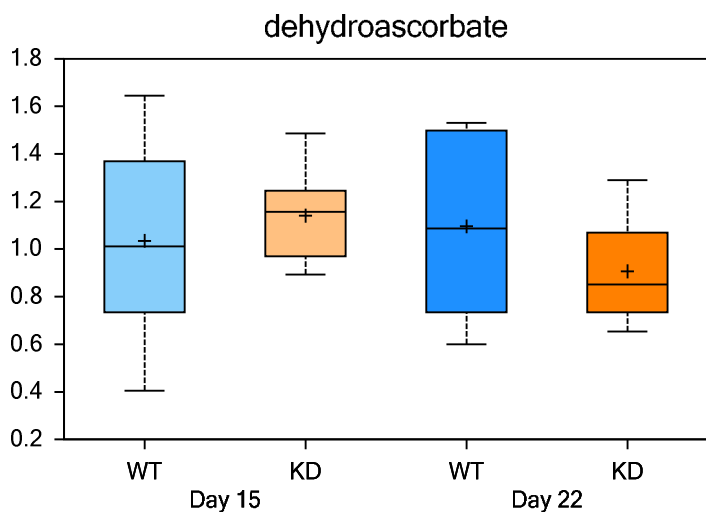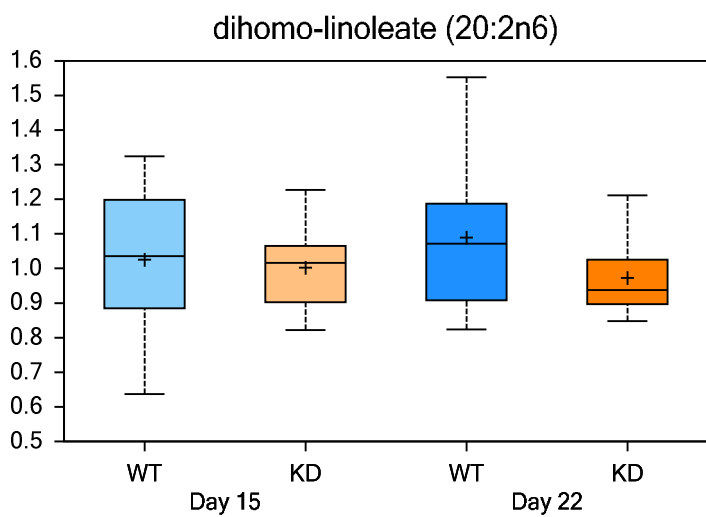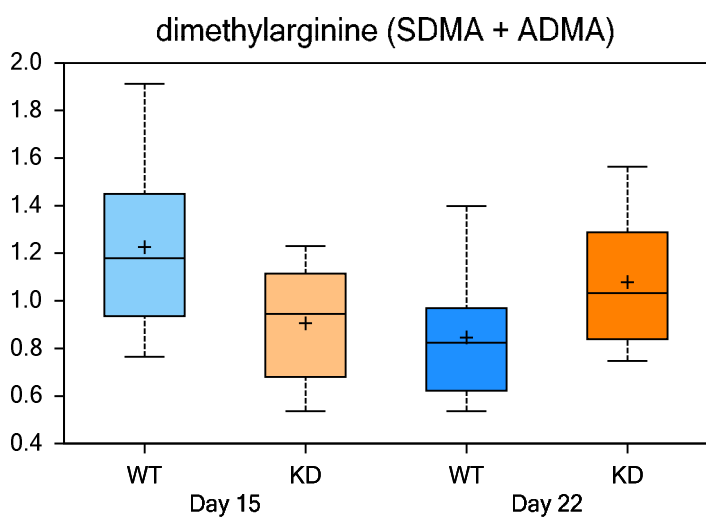

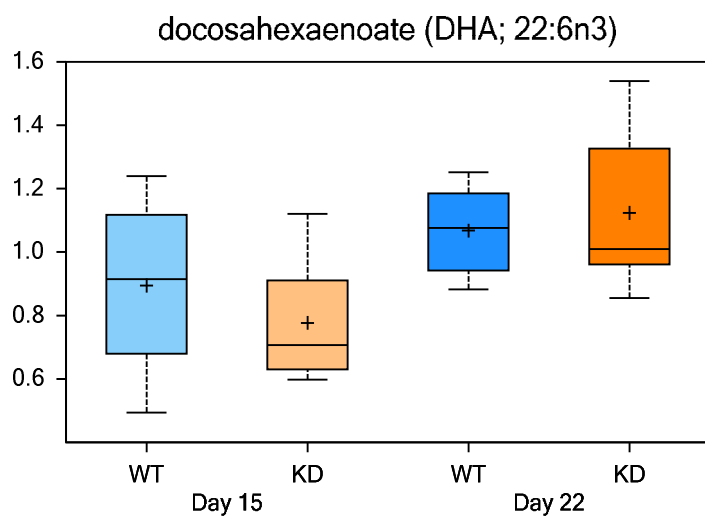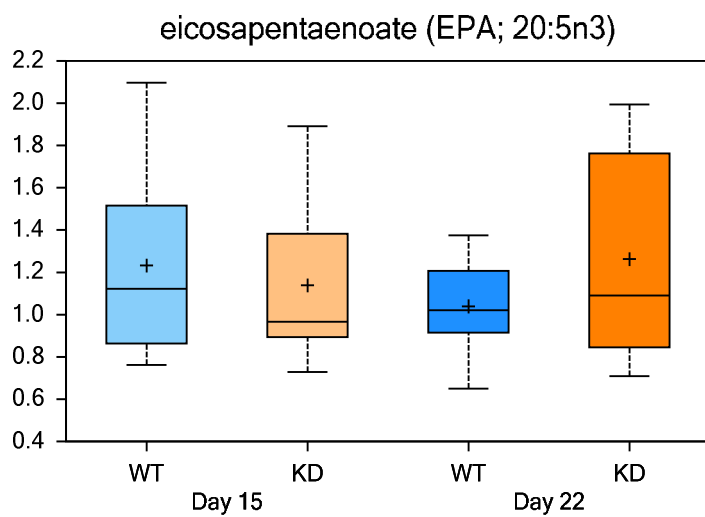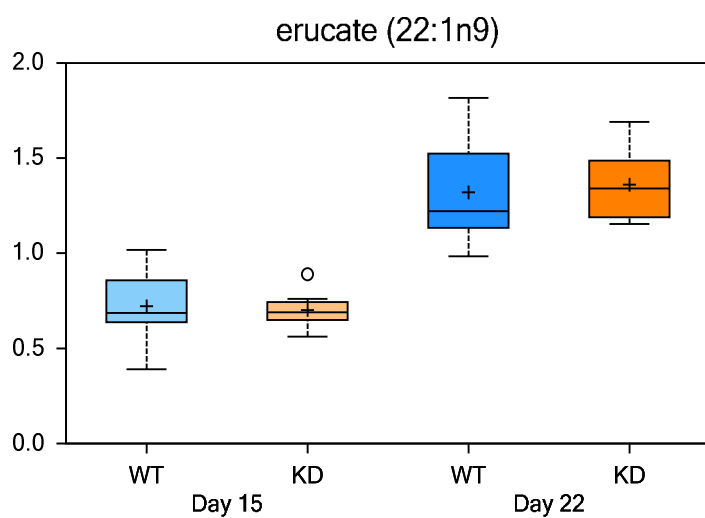

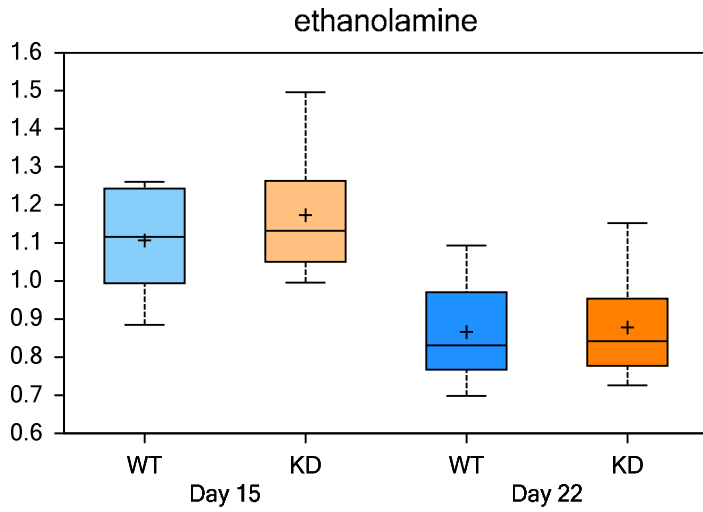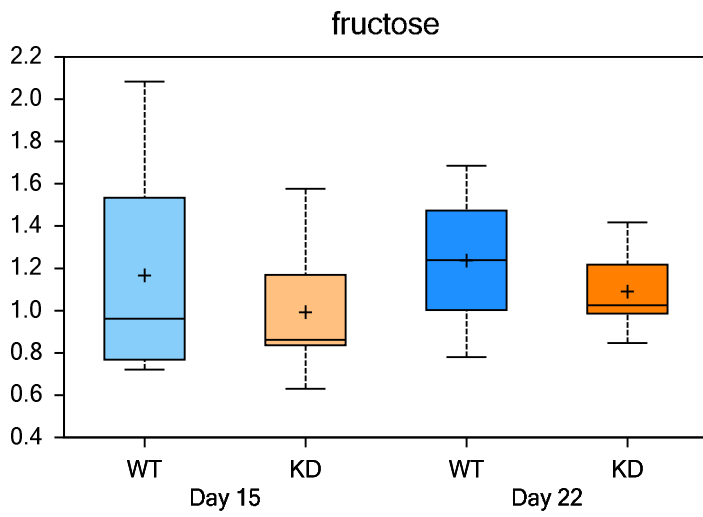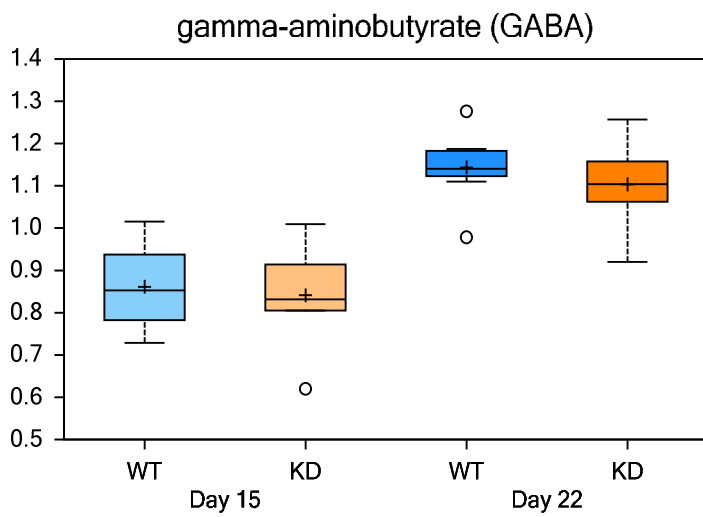

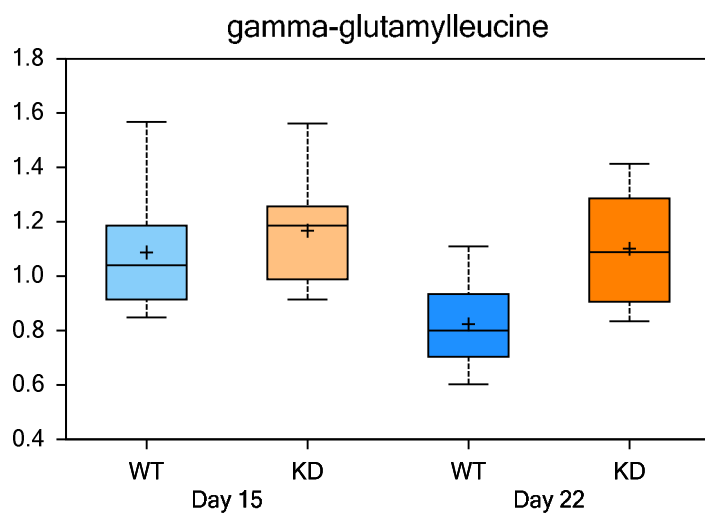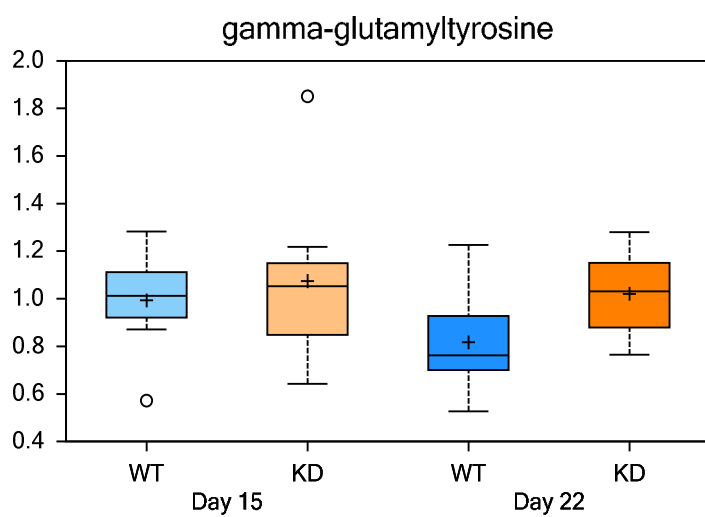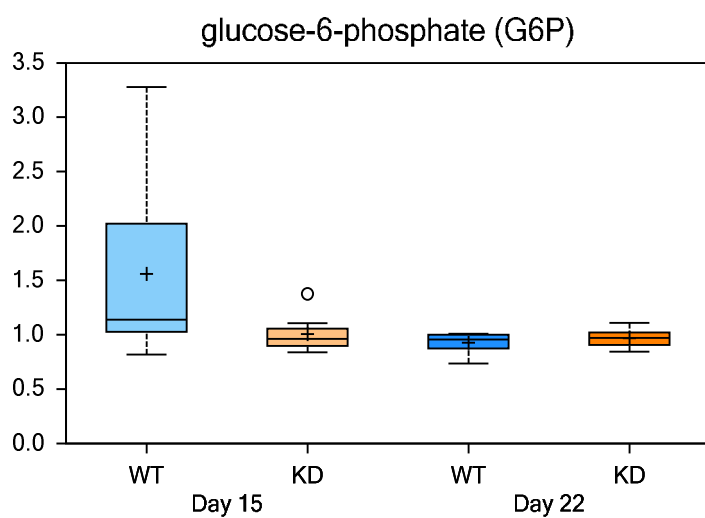

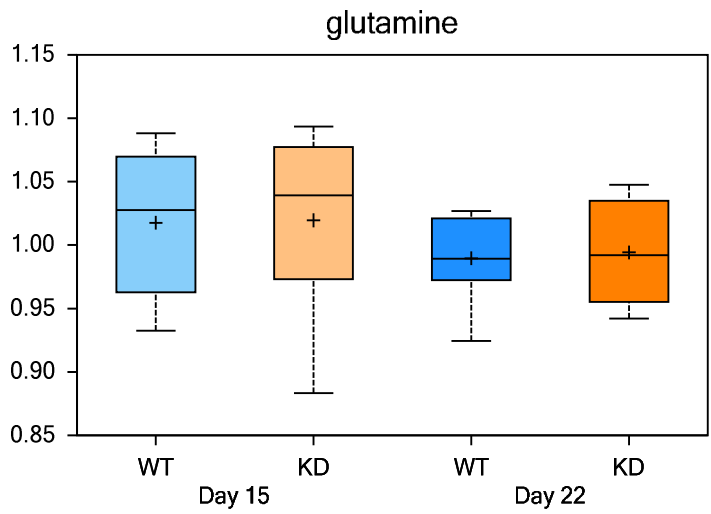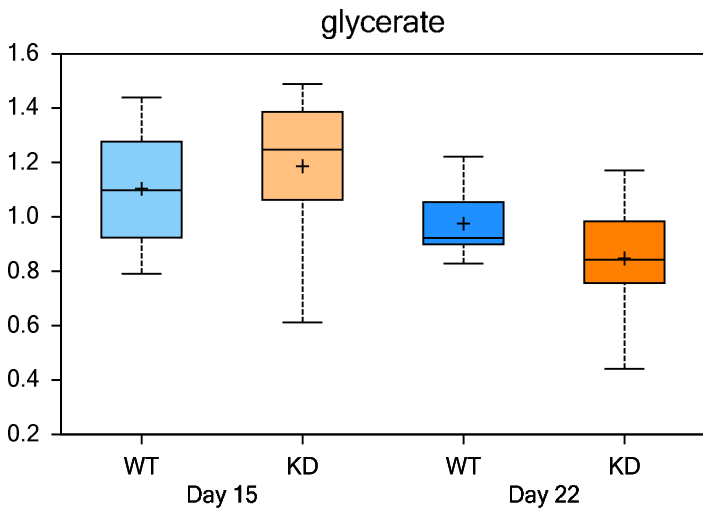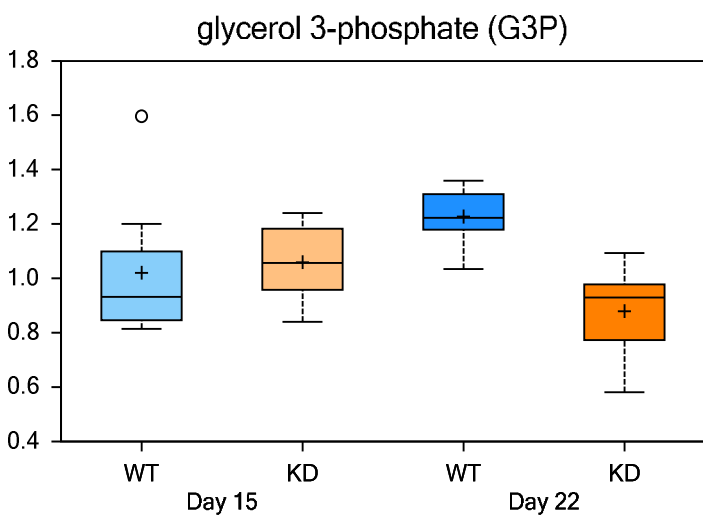



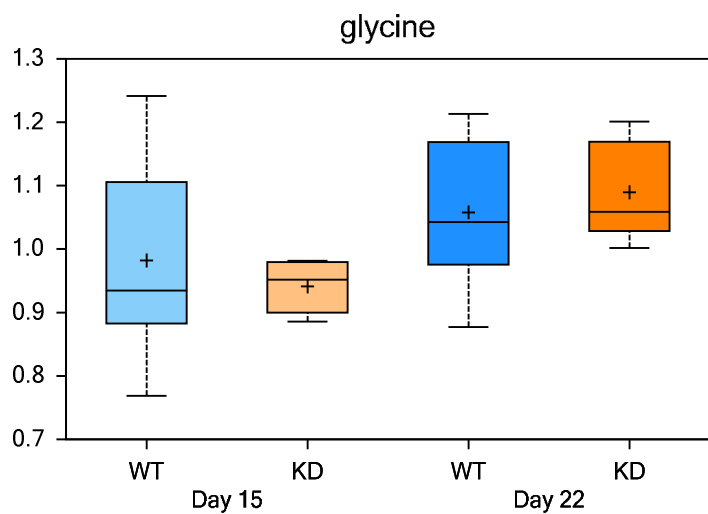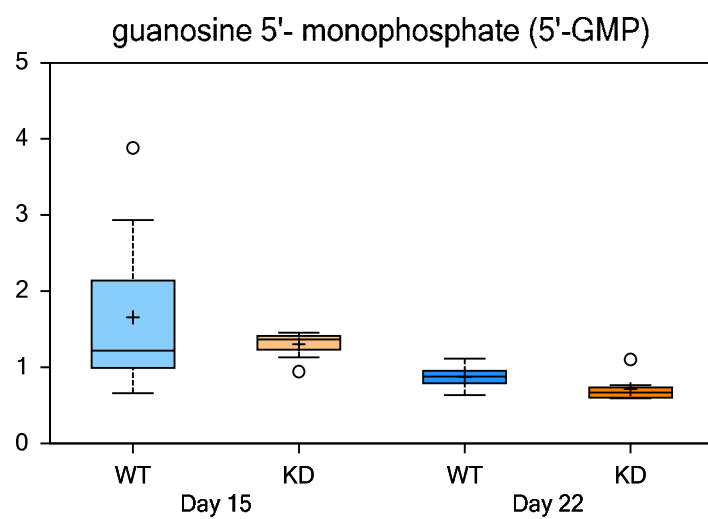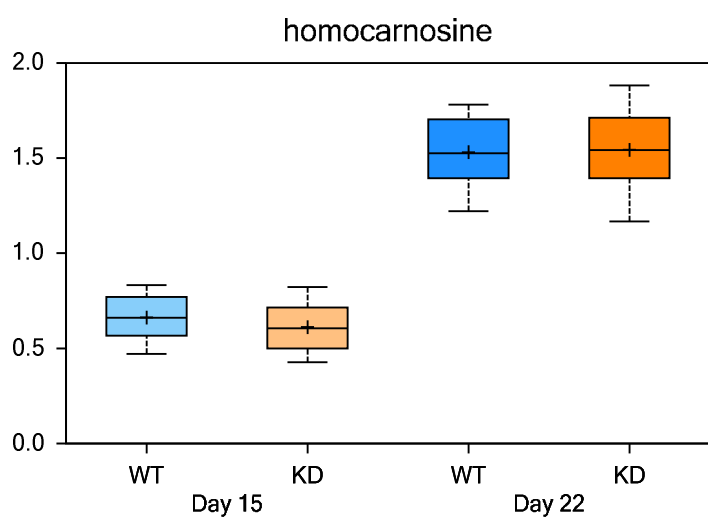

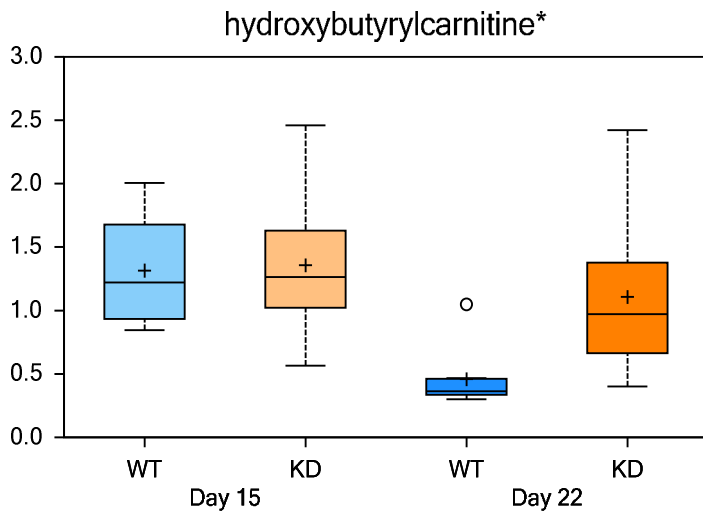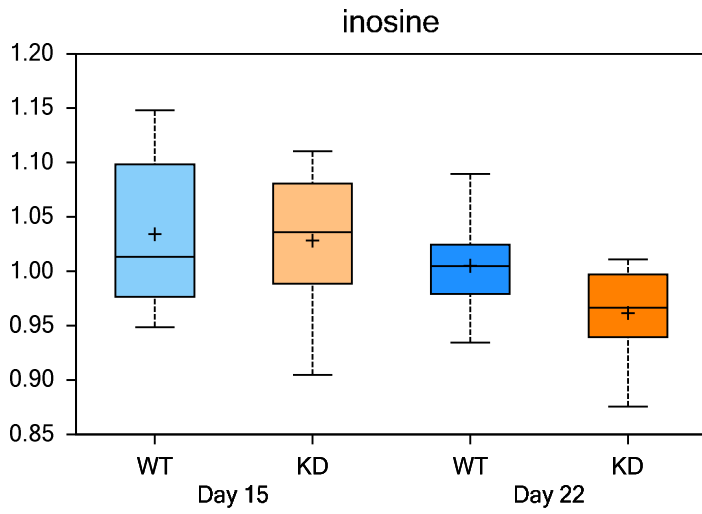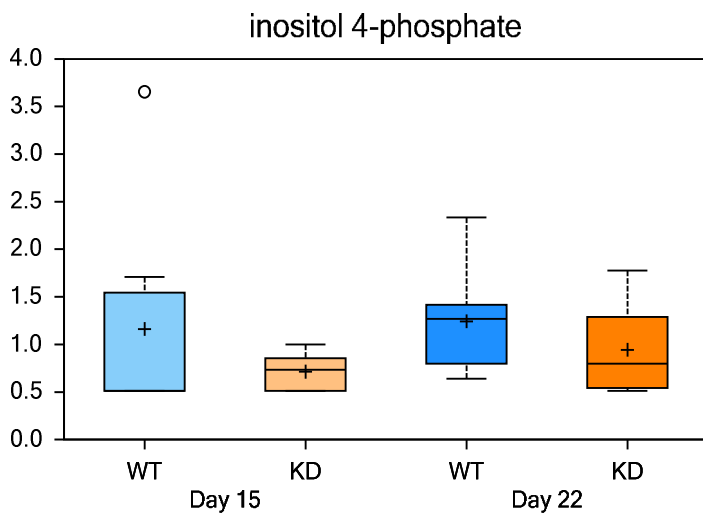

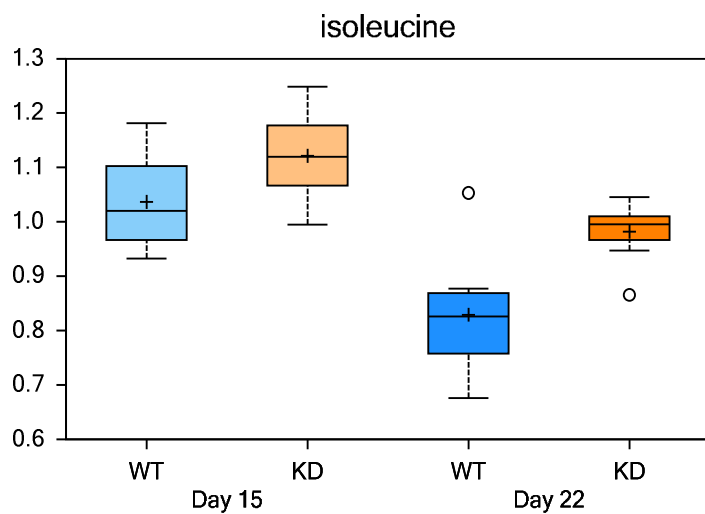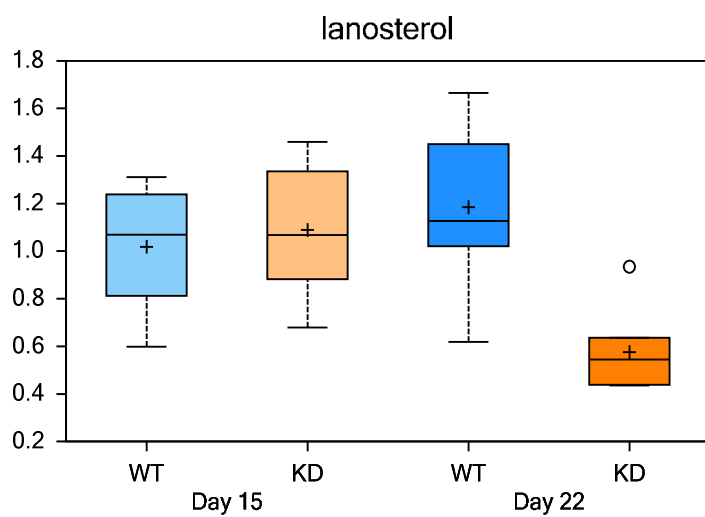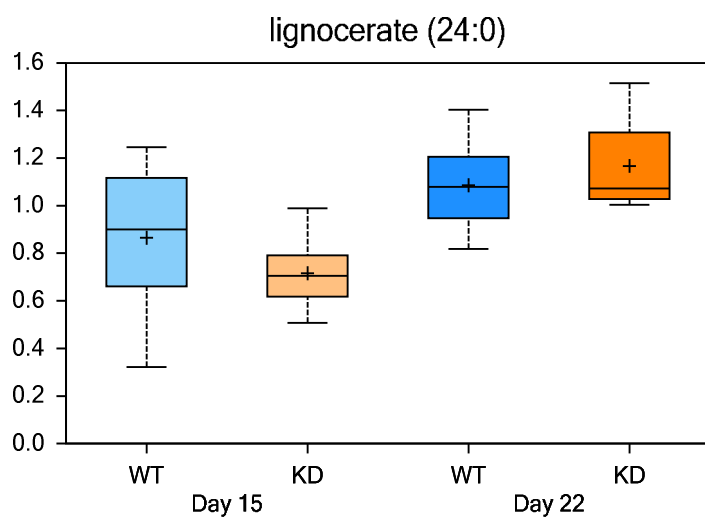

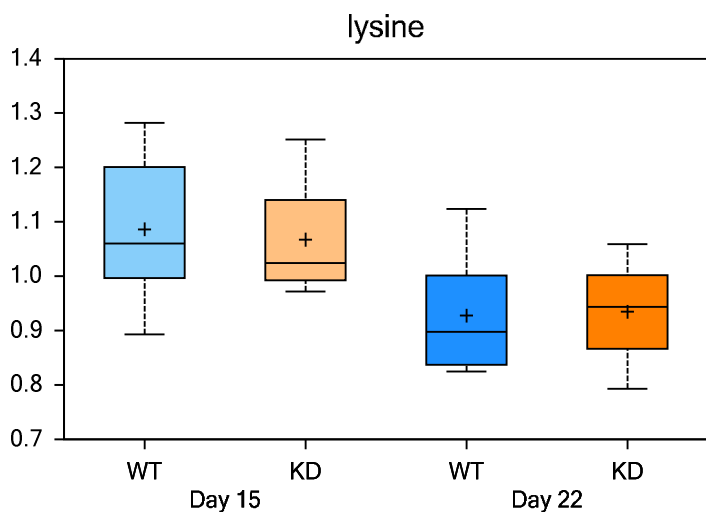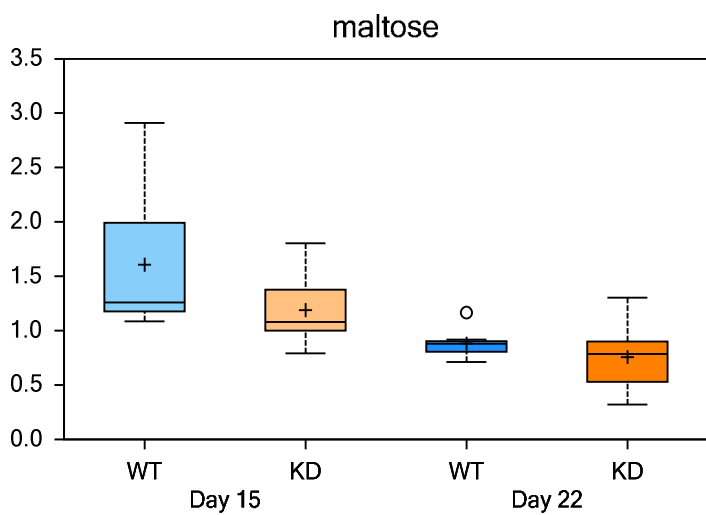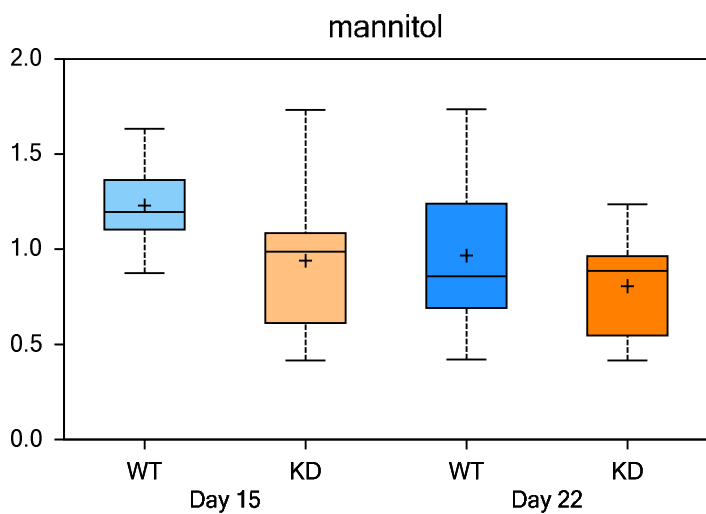

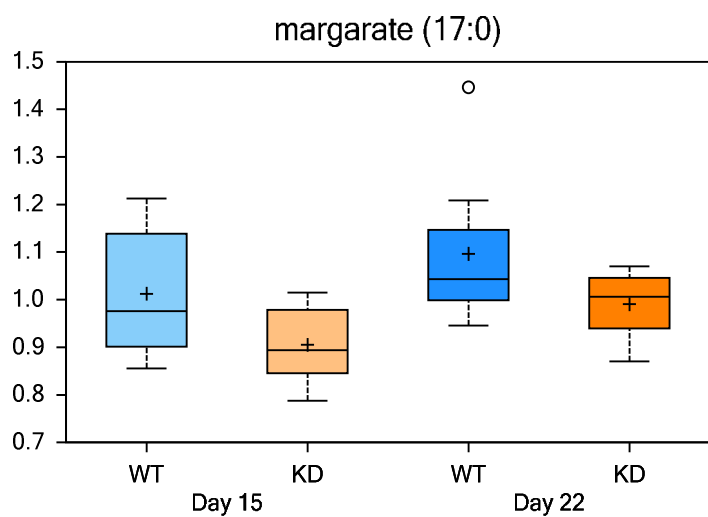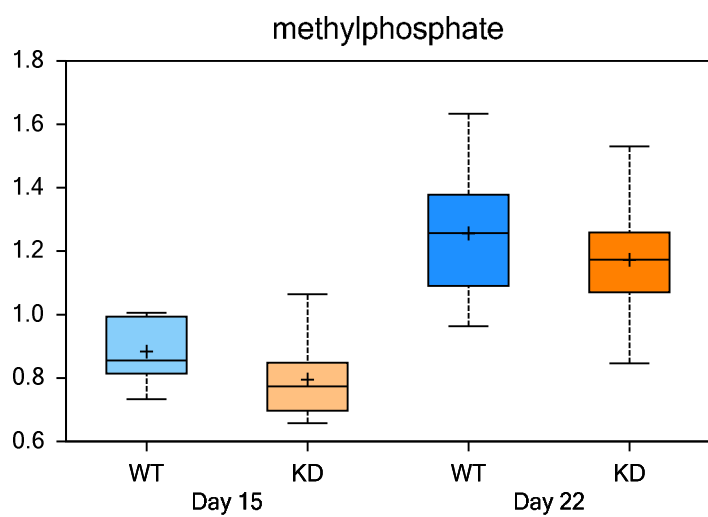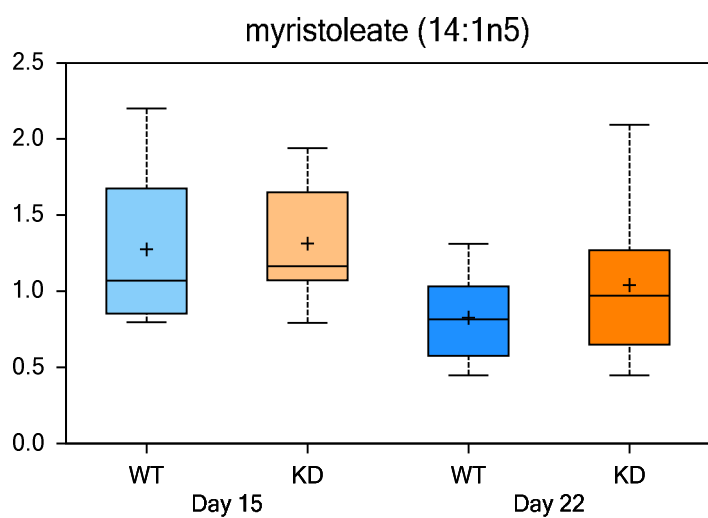

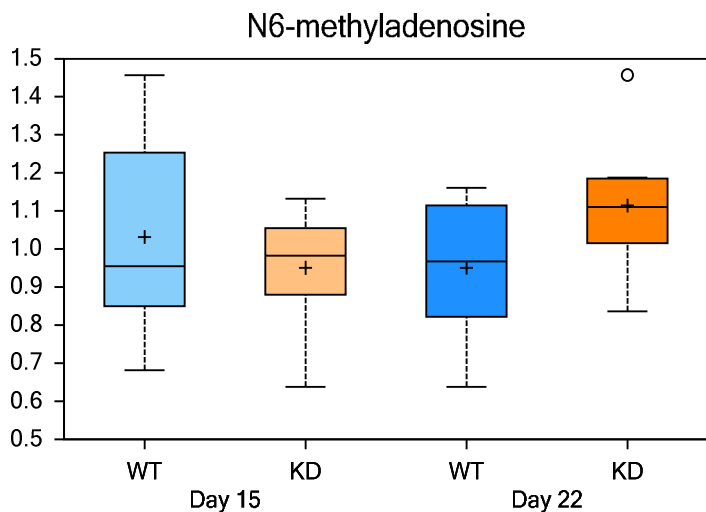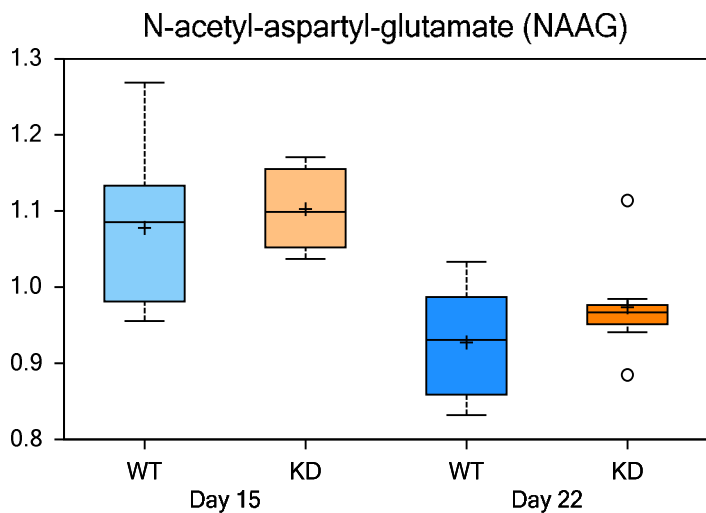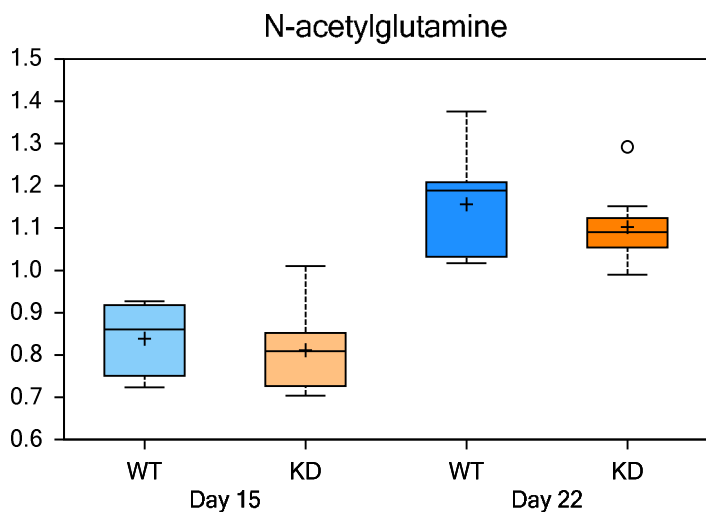

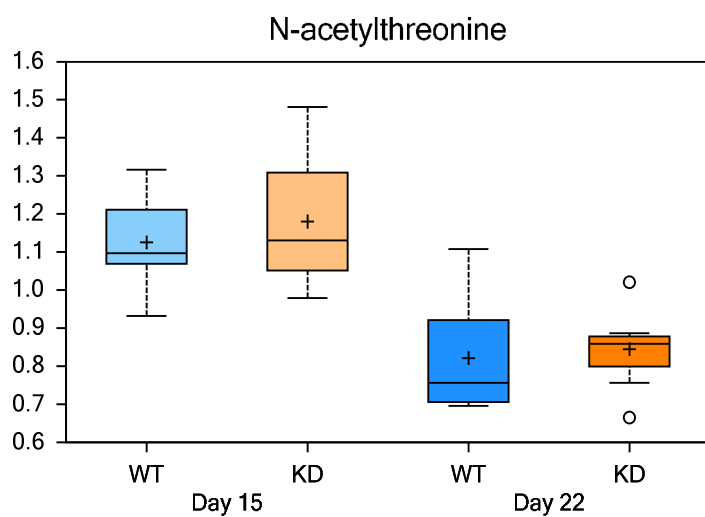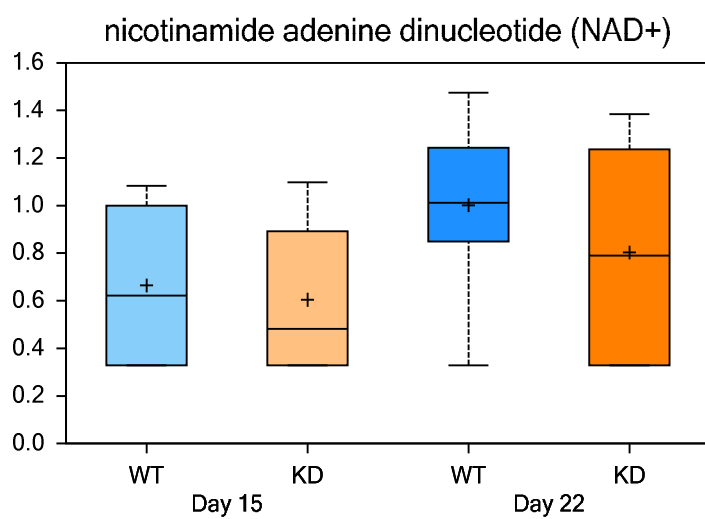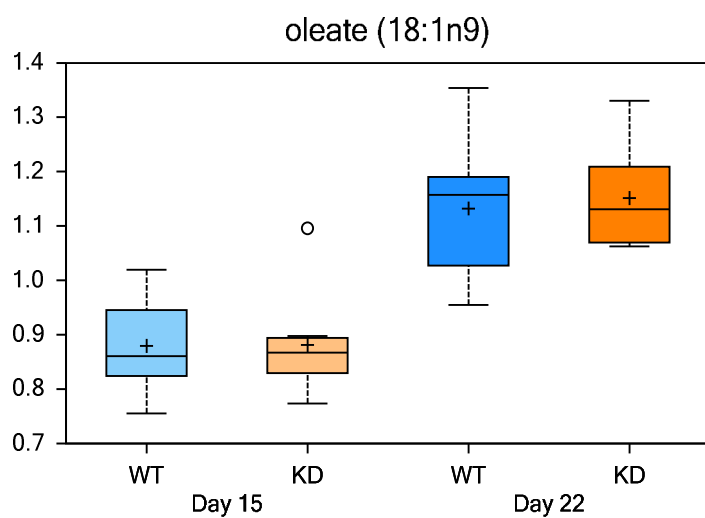

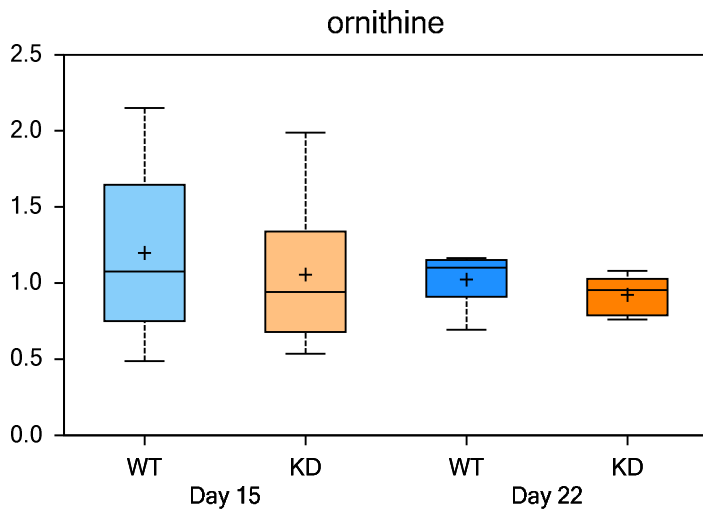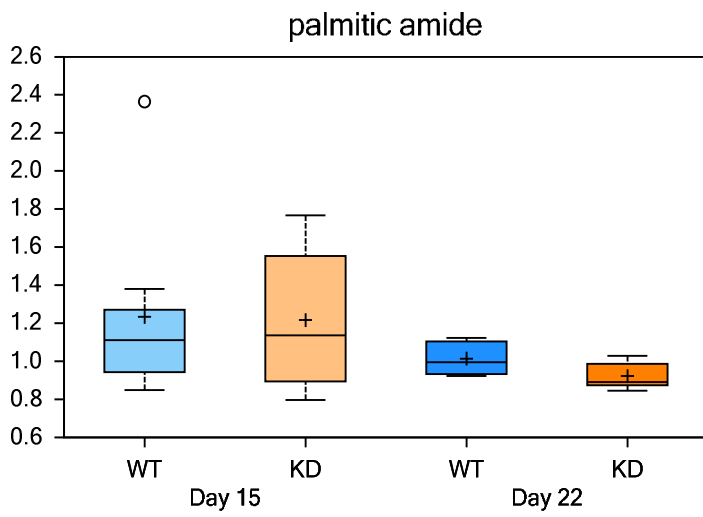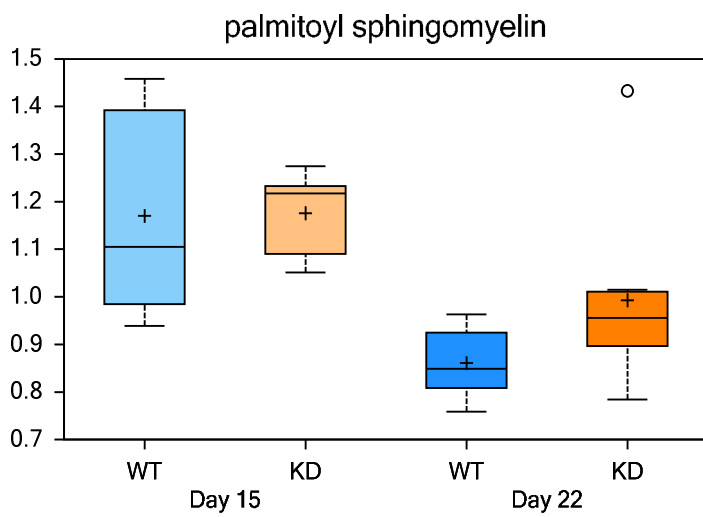



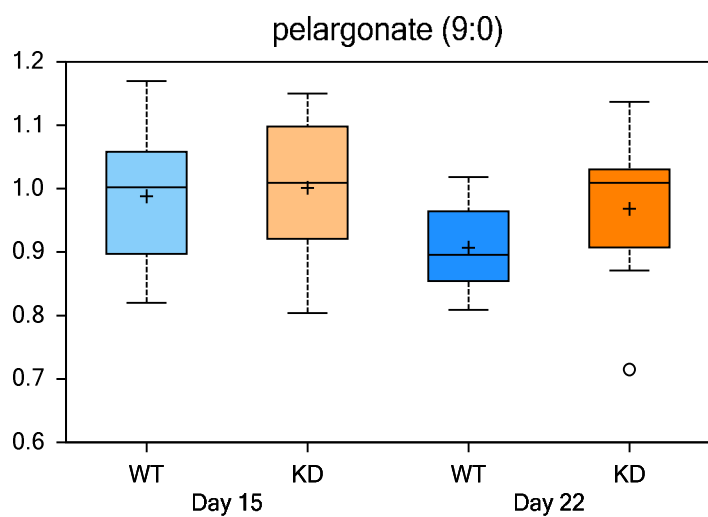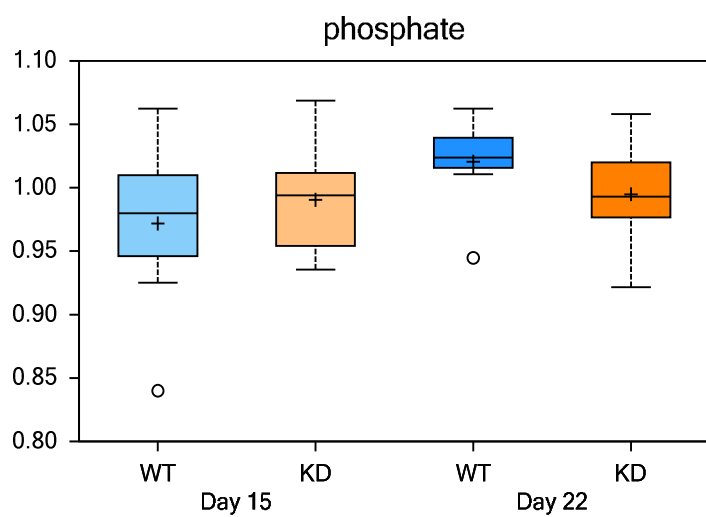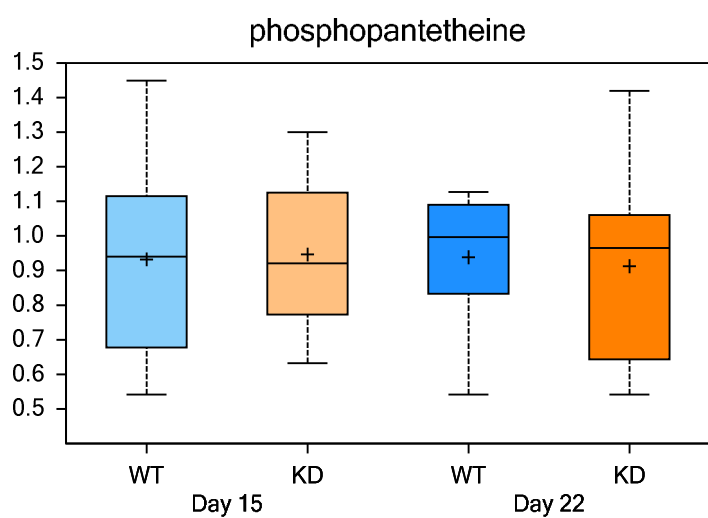

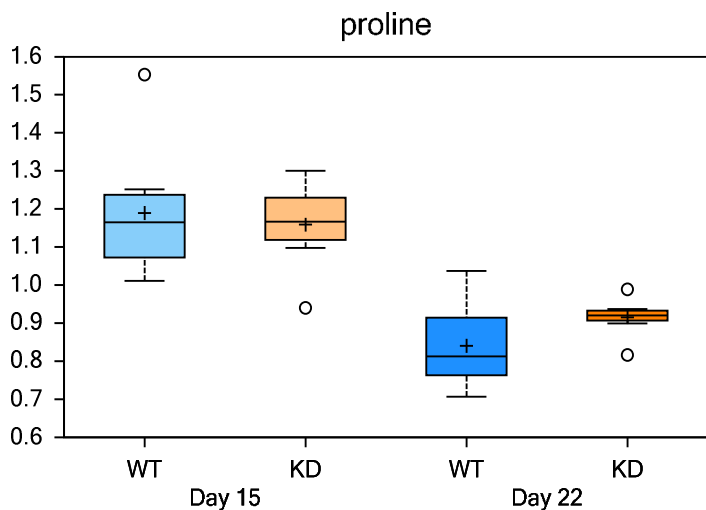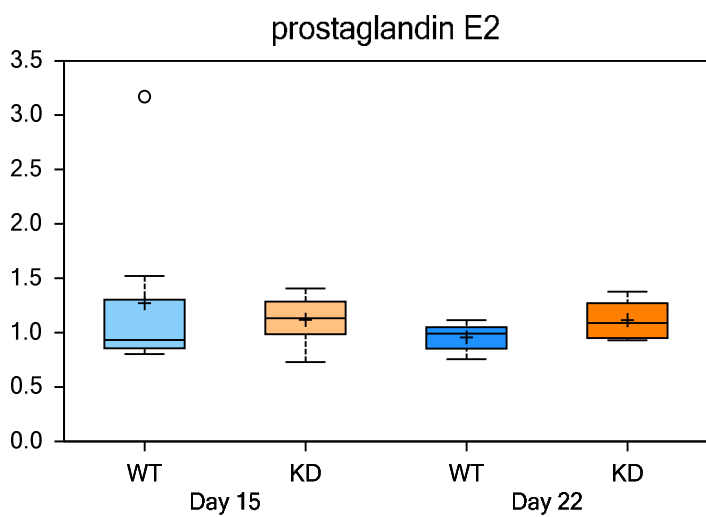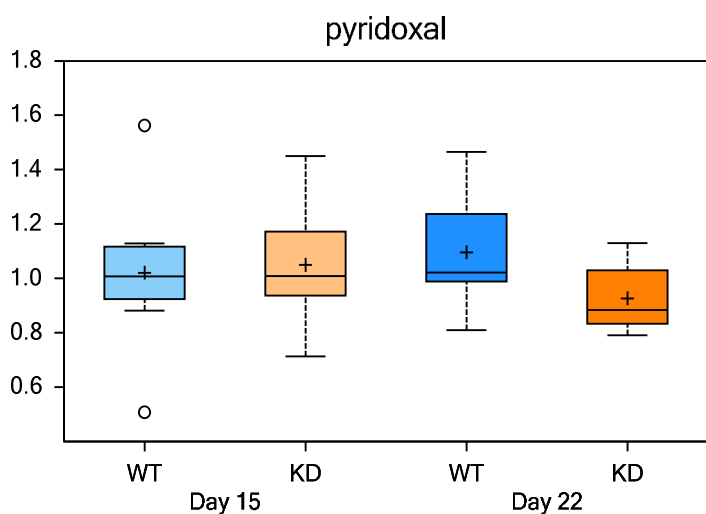

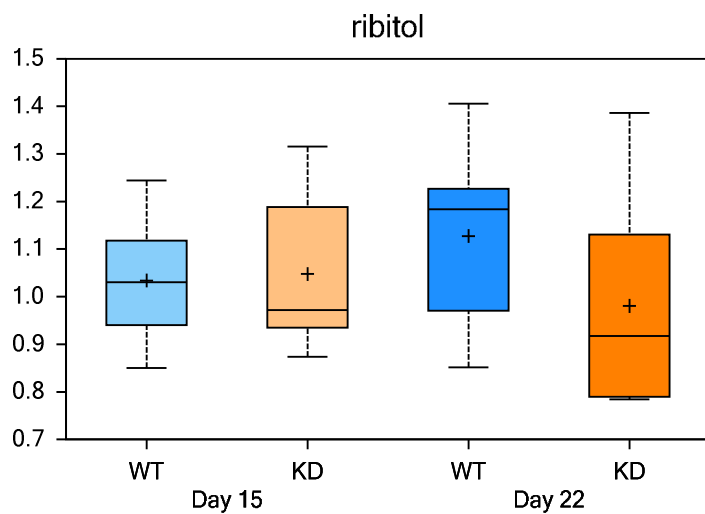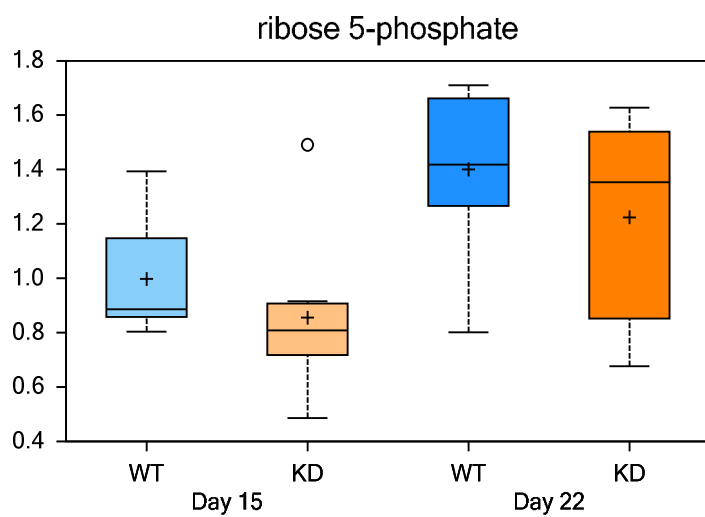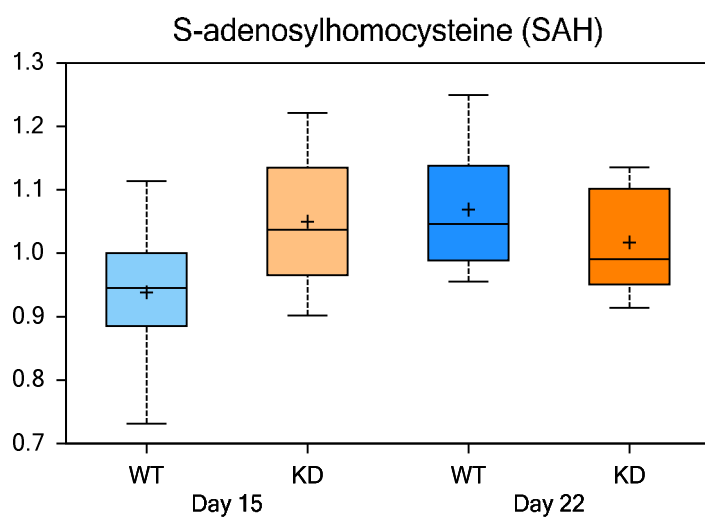

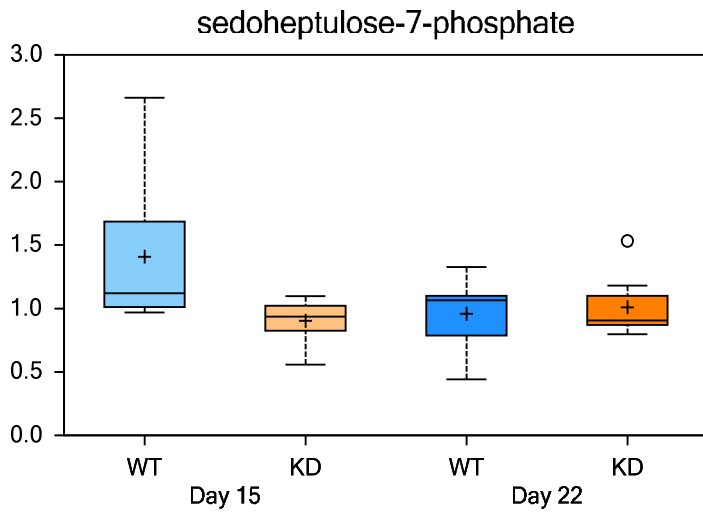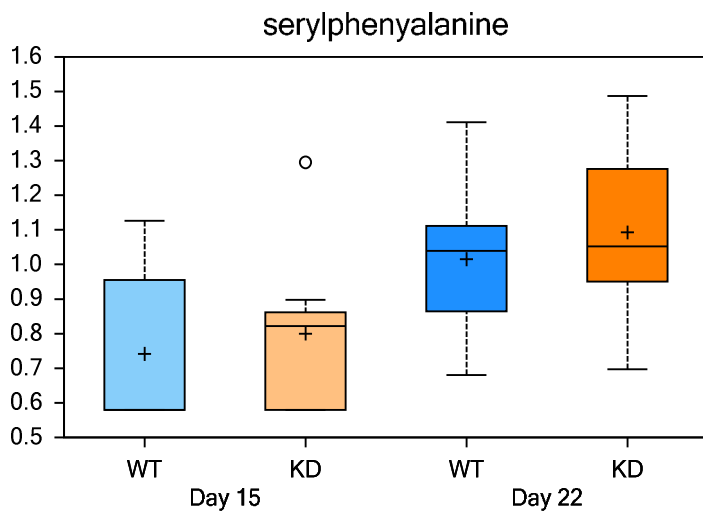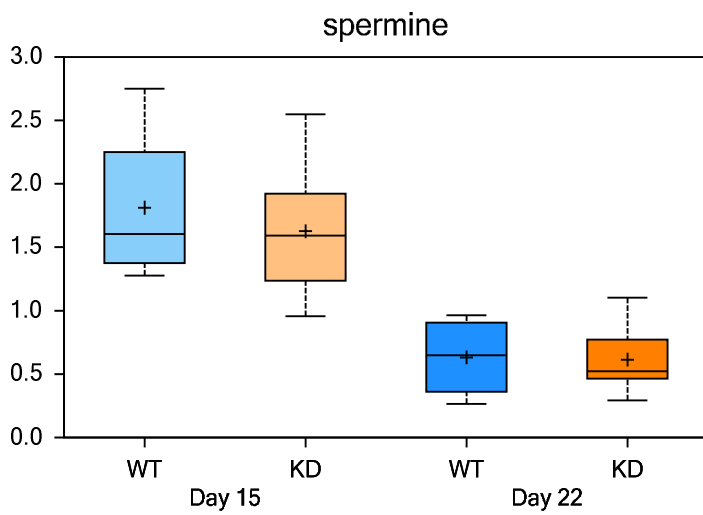

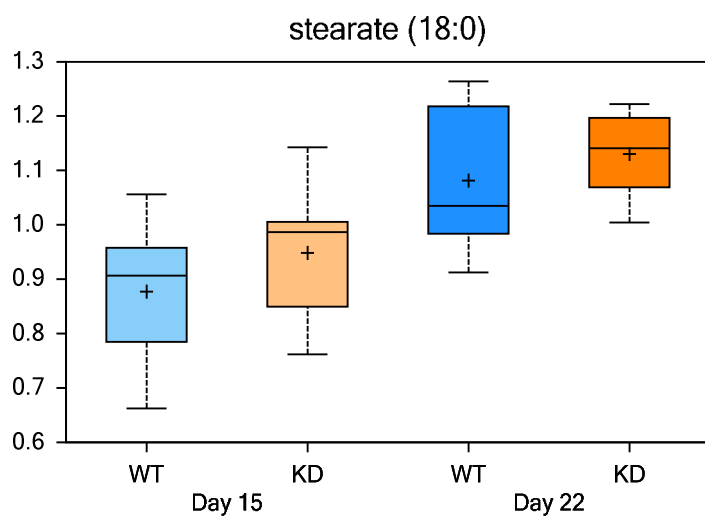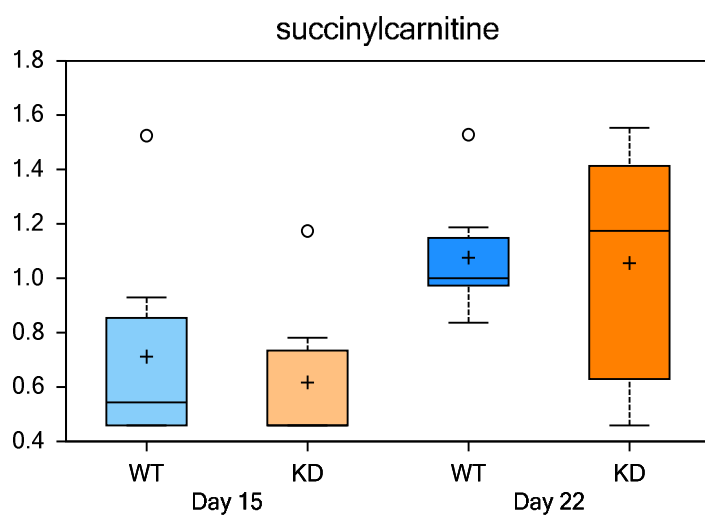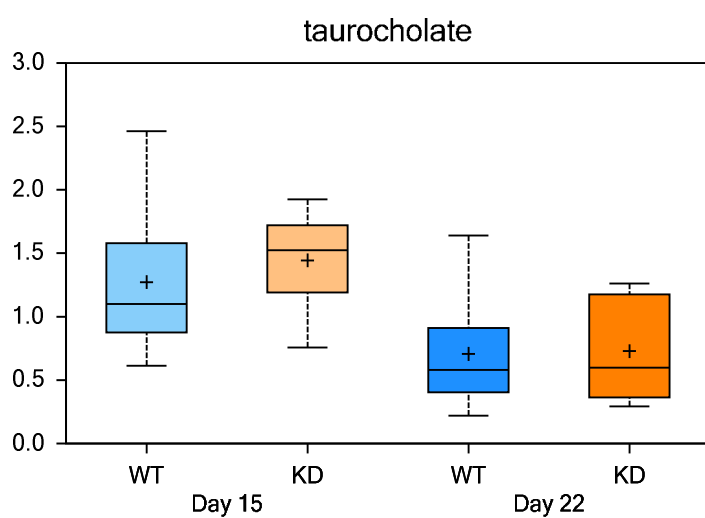

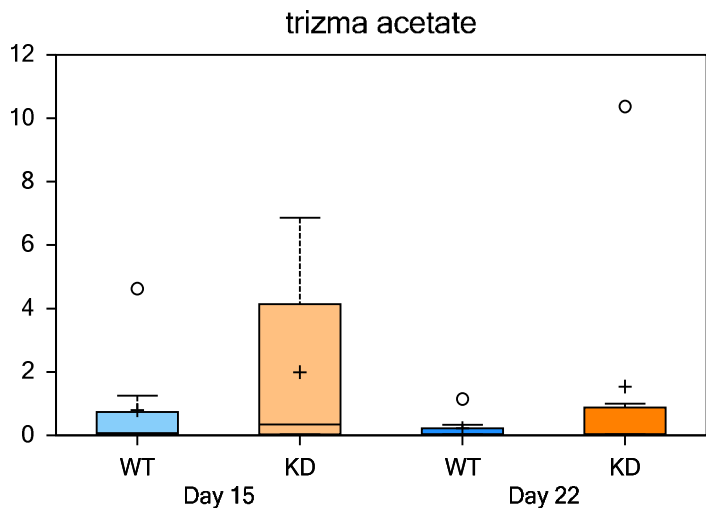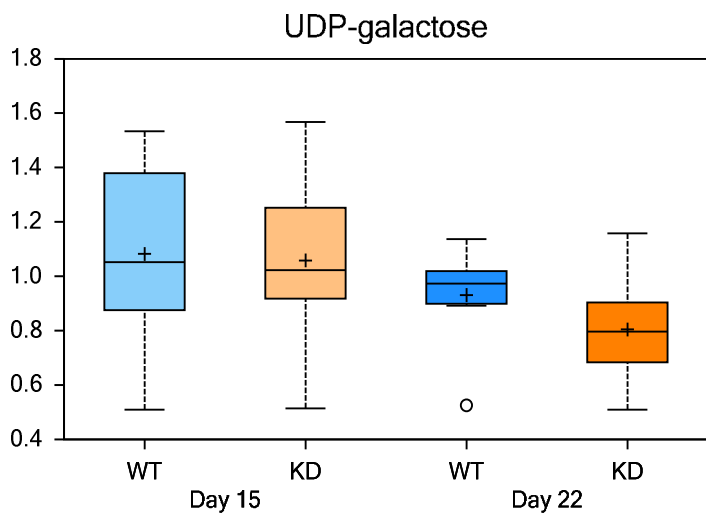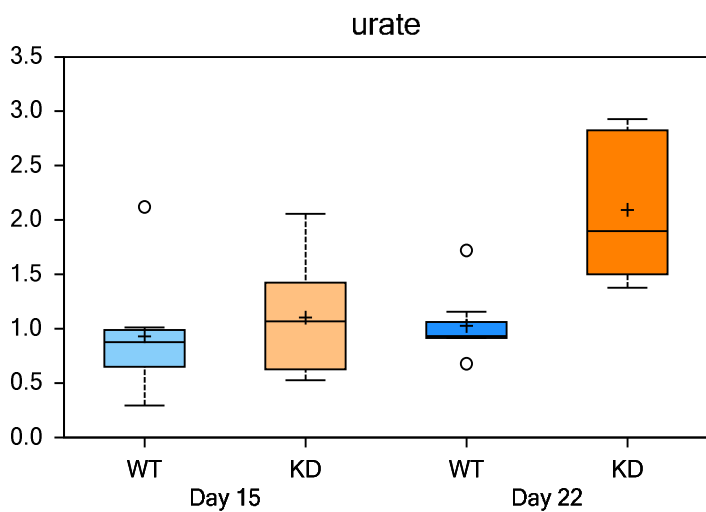

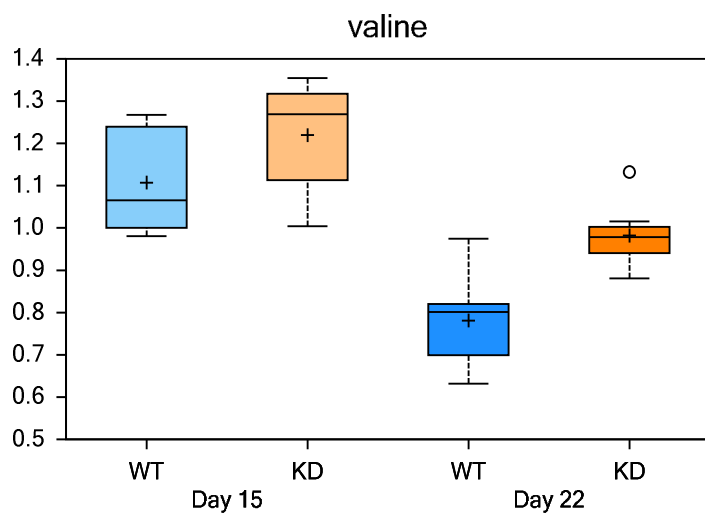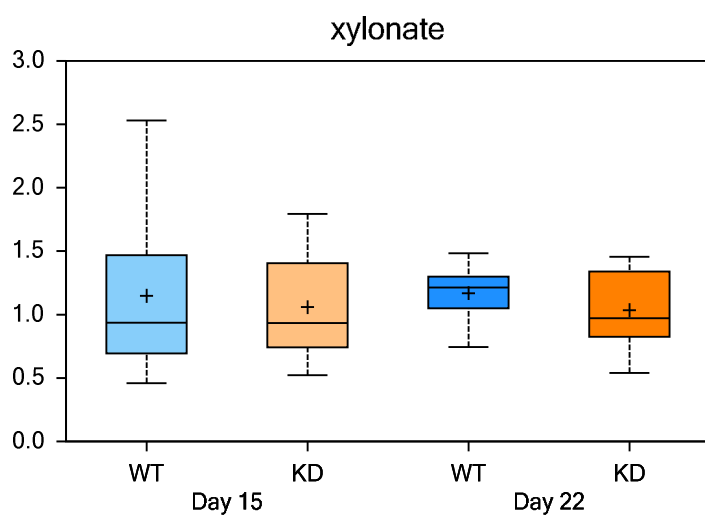

### *egend*

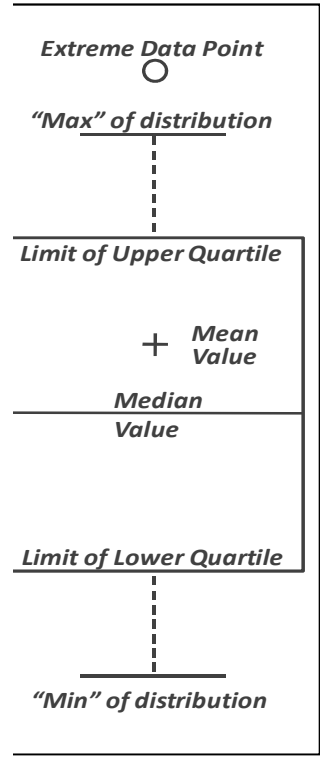



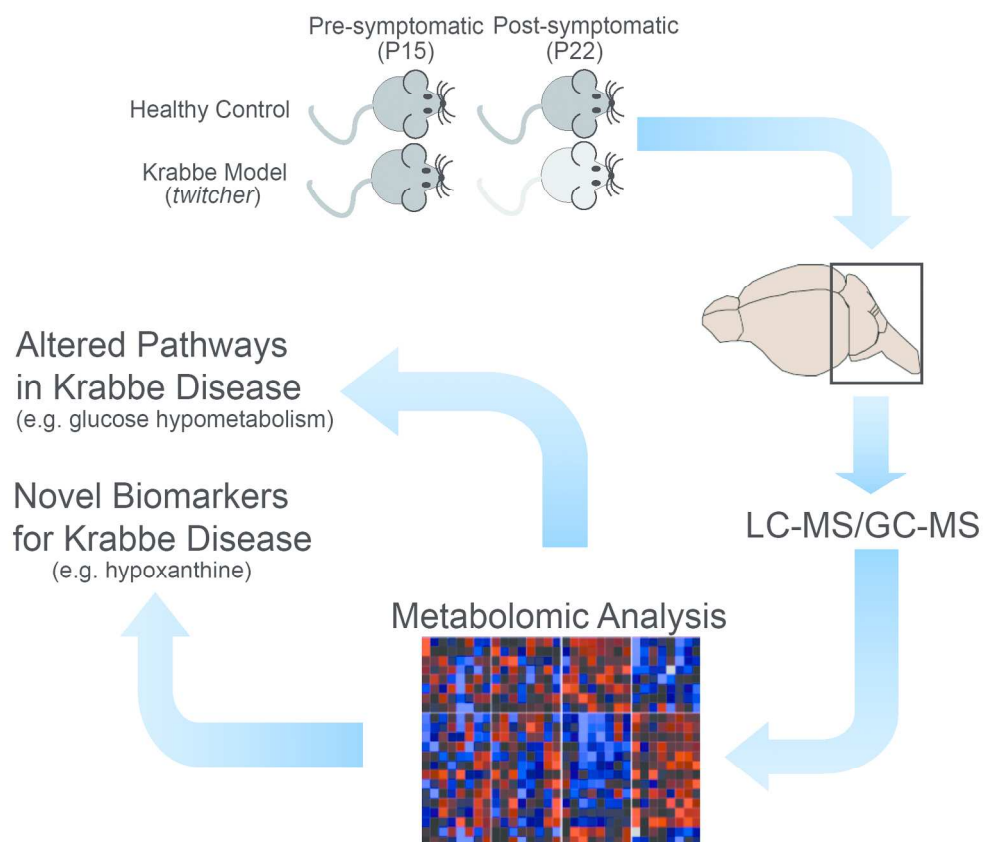

We performed a global metabolomic analysis from the hindbrains of pre-symptomatic and post-symptomatic Krabbe mice. We identified several altered metabolic pathways and a number of novel potential biomarkers that may be beneficial for patients with Krabbe disease.

173x150mm (300 x 300 DPI)

We performed a global metabolomic analysis from the hindbrains of pre-symptomatic and post-symptomatic Krabbe mice. We identified several altered metabolic pathways and a number of novel potential biomarkers that may be beneficial for patients with Krabbe disease.
